# Supplementary material
Source: PubMed Central journal article supplement (PMC2731558)
Supplement: NIHMS96575-supplement-Supp__Data.pdf [file NIHMS96575-supplement-Supp__Data.pdf]

## SUPPLEMENTAL METHODS

### Large scale culture and isolation of *C. elegans* males

High-density, large scale *C. elegans* culture was carried out using egg plates (A. Skop, K. Van Doren, *pers. comm.*). 300mls LB and 300mls raw egg yolks were heated to 70°C, strained through cheesecloth, and cooled to 35°C before addition of 100mls of concentrated HB101 bacterial suspension. 15mls of egg suspension were poured over solidified 150mm Super NG plates (3g NaCl, 18.75g Bacto Agar, 20g Bacto Peptone, 1ml 15mg/ml cholesterol in ethanol, and 975ml water), then dried to gel consistency over 1-2 days at 20°C.

Spermatogenic samples were isolated from *him-8(e1489)* males. *him-8(e1489)* animals, which produce 37% XO males, were grown on egg plates, rinsed off with 1xM9, subjected to centrifugation at 3000xg for 5 minutes, and resuspended in 1xM9. An equal volume of 60% sucrose solution was added, and the mixture was subjected to centrifugation at 2000xg for 5 minutes at 4°C. Animals were removed from the top of this sucrose float and rinsed over 35mm mesh with 1xM9. For synchronous populations of animals, embryos were collected and hatched overnight in 1xM9. L1 larvae were collected, seeded onto egg plates, and grown at 20°C for 3-4 days on egg plates. Adults were collected by sucrose flotation and rinsed in 1xM9. Filtration through 35mm Nyltex nylon mesh separated male worms from hermaphrodites to over 95% purity as observed by microscopic examination.

**Spermatogenic and oogenic chromatin purification**

Spermatogenic germ cells and germ nuclei were purified as previously described<sup>1</sup> except that male worms were subjected to 20,000 psi for 1 minute 3 times in succession to maximize yield. Spermatogenic material was pelleted by centrifugation at 475xg for 10 minutes, and either used immediately for chromatin preparation or frozen at  $-80^{\circ}\text{C}$ . Using 4',6-diamidino-2-phenylindole (DAPI) staining to observe chromosome cytology, we found 5-20% of spermatogenic cells and nuclei to be in characteristic stages of meiosis, an increase over the 5% of cells in meiosis previously observed<sup>1</sup>. This increase in isolated meiotic nuclei is likely due to the increased force we applied to achieve large-scale isolation of spermatogenic cells and nuclei.

Unfertilized oocytes were purified from *fer-1(hc1)* animals. The *fer-1(hc1)* mutant produces defective sperm at  $25^{\circ}\text{C}$ <sup>2,3</sup>, causing XX animals to be functional females in which some of the oocytes mature, are ovulated but fail to be fertilized and eventually become polyploid through endomitotic duplication (Emo)<sup>4</sup>. Unlike fertilized embryos that have a tough eggshell, oocytes are amenable to the same homogenization procedures used to isolate spermatogenic chromatin and were therefore chosen as the cell type for subtractive analysis.

Synchronous cultures of *fer-1(hc1)* animals were established as described above except L1 animals were grown overnight at  $20^{\circ}\text{C}$ , then shifted to  $25^{\circ}\text{C}$  for 3 days when adults were collected by sucrose filtration. Oocytes were purified as previously described<sup>5</sup>, except animals were disrupted briefly in a Waring blender to release more oocytes from within the body cavity after serotonin treatments. Germ cells in oogenesis after purification were collected by centrifugation at 500xg for 5 minutes at  $4^{\circ}\text{C}$  and used

for chromatin preparation or frozen at  $-80^{\circ}\text{C}$ . Using DAPI staining and cytological examination, we observed 50-70% Emo oocytes, as well as 10-30% of cells in diakinesis, and 20-30% fertilized embryos, indicating that the temperature shift did not completely block fertilization.

Chromatin from both germ cell populations was isolated as follows. Approximately 75-200ml of packed spermatogenic germ cells and nuclei were washed 2x in 50mls Monovalent Free Sperm Medium (MSM)<sup>1</sup> and isolated by centrifugation at 750xg for 5 minutes at  $4^{\circ}\text{C}$ . These spermatogenic cells or 200-750ml of packed oogenic cells were resuspended in 2 mls of Buffer A (250mM sucrose, 10mM Tris HCl pH 8.0, 10mM  $\text{MgCl}_2$ , 1mM EGTA and 1x protease inhibitor cocktail III (PIC) (Boehringer Mannheim). Both spermatogenic and oogenic germ cells were disrupted by homogenization with 100 strokes of a tight fitting pestle. The homogenate was subjected to centrifugation at 4,000xg for 5 minutes. The pellet, containing germ nuclei and chromatin, was resuspended in 2mls Buffer A plus 0.1% Triton X-100, 0.25% NP-40, and 1x PIC. Nuclear membranes were removed by further homogenization of 20 strokes and centrifugation at 40xg for 5 minutes at  $4^{\circ}\text{C}$ . The resulting pellet was extracted 3x in Buffer A. The extracted material and original supernatant were combined and subjected to centrifugation at 4000xg 5 minutes  $4^{\circ}\text{C}$ . The pellet was washed 1x in Tris Buffer (10mM Tris HCl pH 8.0, 0.2mM EDTA) plus 0.1% Triton X-100 1x, 2x in Tris Buffer alone, then resuspended in 1ml Tris Buffer. Chromatin was purified by centrifugation through a sucrose gradient. 0.5mls were layered over 5mls of 1.7M sucrose, 10mM EDTA pH 8.0. The top 1/3 was stirred gently to create a gradient, then subjected to centrifugation at 50,000xg for 1 hour at  $4^{\circ}\text{C}$ . The resulting pellets were resuspended in

1ml Tris Buffer, washed 2x in Tris Buffer, then resuspended in 1ml Tris Buffer.

Chromatin proteins were precipitated with 20% TCA on ice overnight, subjected to centrifugation at 14,000xg for 15 minutes at 4°C, washed 1x in acetone then air-dried. (TCA precipitation was not performed on one spermatogenic and one oogenic chromatin preparation.)

SDS-PAGE and colloidal blue staining (Novex) revealed that core histones were the most abundant proteins in both preparations, suggesting that this procedure results in similar enrichment of chromatin proteins in both sample types (Supplemental Fig. 2). Major sperm proteins (MSPs), the most abundant proteins in sperm cytosol and pseudopods required for amoeboid locomotion of *C. elegans* sperm<sup>6</sup>, were undetectable in our chromatin preparations by colloidal blue staining, indicating that sperm cellular components had been effectively removed. Subsequent tandem mass spectral analysis detected MSP proteins in very low abundance (Supplemental Tables 2 and 3).

### **Multidimensional Protein Identification Technology (MudPIT) identification of chromatin-associated proteins**

A total of eleven 12-step LC/LC/MS/MS experiments were performed: six using spermatogenic chromatin, and five using oogenic chromatin. Precipitated chromatin protein preparations were dissolved in digestion buffer and sequentially digested with Lys-C and trypsin. 50-100 µg of protein were used for each experiment. A digested peptide mixture was loaded onto a biphasic (strong cation exchange/reversed phase) capillary column (0.1 mm ID) and washed with a buffer that contained 95% DDI water, 5% acetonitrile, and 0.1% formic acid. Two-dimensional liquid chromatography (2DLC)

separation and tandem mass spectrometry were used for the analysis<sup>7</sup>. The flow rate at the tip of the biphasic column was  $\sim 300$  nL/min when the mobile phase composition was 95% H<sub>2</sub>O, 5% acetonitrile, and 0.1% formic acid. The ion trap mass spectrometer, ThermoElectron LCQ Deca (Thermo Electron, San Jose, CA) was set to the data-dependent acquisition mode with dynamic exclusion turned on, and maximum ion injection time was set to 100 ms. One MS survey scan, with mass range 400~1400 m/z, was followed by four MS/MS scans. The target value for MS was  $1 \times 10^8$  and for MS/MS was  $7 \times 10^7$ . Roughly 50,000 tandem mass spectra were acquired per experiment. Tandem mass spectra obtained were analyzed by SEQUEST Ver. 27 (rev 9) using the Wormpep database (Ver. wormpep80)<sup>8</sup>. All searches were performed using a precursor mass tolerance of 3 amu calculated using average isotopic masses. Cysteine mass was modified by the addition of 57 amu to represent carboxyamidation. A fragment ion mass tolerance of 1 amu was used. Enzyme cleavage specificity was set to non-specific. The SEQUEST outputs were then analyzed by DTASelect 1.9<sup>9</sup>. The DTASelect filter settings were: XCorr: +1 ions 2.0, +2 ions 2.9, +3 ions 3.8; delta CN: 0.08; only half or full tryptic peptides were considered.

To enhance subtraction of low abundance oogenic factors in later steps, more stringent criteria were adopted for protein identification from spermatogenic germ cells (a minimum of two different peptides per protein per individual preparation) than from oogenic ones (a minimum of two different peptides per protein from all datasets of five preparations combined). Both spermatogenic and oogenic data sets had comparable percentages of proteins in different functional categories (see Supplemental Table 5). Functional categories were determined by using *C. elegans* protein sequences in BLAST

searches of the GenBank database to determine homology/orthology for homologous proteins with E values  $\leq 10^{-10}$  and/or annotations in WormBase ([www.wormbase.org](http://www.wormbase.org) Release 155) and Worm Protein Database (BIOBASE).

### **Subtractive Analysis**

We found subtractive analysis removed appropriate factors. Subtracted proteins included those expected to associate with chromatin in both meiotic cell types, including canonical histone proteins, cohesin proteins SMC-1 and SMC-3 [Structural Maintenance of Chromosomes], the condensin SMC protein MIX-1 (Mitosis and X-associated protein)<sup>10</sup>, and DPY-26 (DumPY) a protein that has roles meiosis as well as dosage compensation<sup>11</sup>. Likely contaminants such as spindle, nuclear envelope/pore, ribosomal, and general housekeeping proteins were also subtracted (Supplemental Table 5).

A unique feature of our approach using abundance measurement is the ability to pinpoint proteins that may have been inappropriately subtracted. A high spermatogenic to oogenic TSC ratio (S/O TSC) (Supplemental Table 1) indicates high enrichment in spermatogenic samples, and can identify bona fide spermatogenesis-enriched proteins that are incorrectly subtracted due to sperm contaminants in oocyte preparations. In such instances, the appropriateness of subtraction can then be assessed by separate means. For example, in our preparations, shared proteins with high S/O TSC included nucleolar residents (e.g. small nucleolar RNA [snoRNA] binding proteins, ribosomal subunits, and FIB-1, *C. elegans* FIBrillarin) as well as components of P-granules, *C. elegans* germ granules (CGH-1 [Conserved Germline Helicase], PGL-1 [P-GranuLe], and GLH-1 [Germ Line Helicase])<sup>12-15</sup>. Antibody staining experiments showed that FIB-1 (nucleolus)

and GLH-1 (P-granule) were similarly localized during both spermatogenesis (Fig. 2f, h) and oogenesis<sup>14,15</sup> but were not associated with mature sperm chromatin, indicating their appropriate subtraction.

### **RNAi analysis**

PCR products corresponding to predicted *C. elegans* genes were synthesized using Ahringer Lab RNAi feeding vectors as templates<sup>16,17</sup>. Primers used to amplify ORFs were: DT7 ForA (TGCGTTATCCCCTGATTCTG) and DT7 RevB (GTAAAACGACGGCCAGTGAG). Alternatively, PCR products were generated by including T7 promoter sequences (TAATACGACTCACTATAG) to the 5' ends of primers designed to each gene. PCR products were verified for yield and size then used as templates for dsRNA synthesis using the Megascript T7 kit from Ambion. RNA was precipitated with a one tenth volume of 3M sodium acetate.

dsRNA corresponding to each gene was injected at 1-4 mg/ml into *him-8(e1489)* L4 hermaphrodites. Animals were plated and transferred to fresh plates after 18 hours, and F1 progeny collected for the next 48 hours. To determine whether low penetrance or subtle defects occurred during gamete formation, the germ cell chromosomes of 50-100 F1 hermaphrodites and males were cytologically observed. After overnight fixation of whole worms in STF (Streck Laboratories), F1 progeny of RNAi-treated animals were rinsed 1x in 1xPBS, 1x in 95% ethanol, 2x in 1xPBS and then stained with 10ng/ml DAPI and mounted using Vectashield (Vector Labs). Germline nuclei in whole animals were visualized using a Zeiss AxioPlanII microscope and OpenLab software (Improvision). Images were captured using an ORCA Hamamatsu CCD camera.

The impact of RNAi on hermaphrodite and male fertility was assessed. F1 hermaphrodites (n=10) were plated individually and serially transferred every 24 hours for 72 hours. The number of embryos and oocytes was counted just after each transfer, and hatched L1 larvae were counted 1 day later to determine number of progeny (the number of viable progeny, dead embryos, and unfertilized oocytes), embryonic lethality (the number of unhatched embryos), and fertilization competence (assessed by the presence of unfertilized oocytes). To assess male fertility, 8 sets of 4 F1 males were mated to either *unc-29(e258)* or *spe-8 dpy-4* hermaphrodites, mating pairs were transferred daily for 4 days, embryos and oocytes counted after transfer, and adult progeny counted after 3 days. Uninjected and mock-injected *him-8(e1489)* F1 male progeny were also scored as controls.

### **Statistical analysis**

To determine statistically meaningful differences in progeny production, numbers of viable progeny, dead embryos, and unfertilized oocytes, F1 hermaphrodite progeny from animals subjected to RNAi (n=10) were compared by a two-tailed T test in each category to a control group from either mock injected or uninjected *him-8(e1489)* animals (n=27). P-values of  $\leq 0.04$  were considered statistically relevant. Because in some cases only 2-3 animals were observed with severely affected fertility (that would be missed by a standard T test), a two-tailed F test was also applied to determine significant variability in numbers of progeny for the ten F1 animals assessed for each experiment. P-values of  $\leq 0.04$  were considered meaningful. We used four categories to assess the extent of sterility (Supplemental Table 6): overall progeny production, variability in progeny



production of individual animals, unfertilized oocyte levels, and embryonic lethality levels. An overall descriptor was also given to each gene to represent the degree of severity and/or penetrance of affected individuals by phenotypic and cytological analysis. High sterility (High Ste) is defined as highly significantly decreased overall progeny number (T-test P value  $\leq 0.00001$ ). High male sterility (High Male Ste) is defined as highly significantly decreased overall progeny number (T-test P value  $\leq 0.00001$ ) not rescued by mating with wild-type N2 males. Moderate sterility (Moderate Ste) is defined as decreased overall progeny number with T-test P values of between 0.00001 and 0.04. Low sterility (Low Ste) have overall progeny numbers that are not statistically different than the control group, but show either significantly increased progeny number variability (F-test P-value  $\leq 0.04$ ), increased unfertilized oocyte levels (T-test P value  $\leq 0.04$ ), embryonic lethality levels (T-test P value  $\leq 0.04$ ), or obvious cytological defects. Fertility defects were also obtained when N2 animals were injected with dsRNA corresponding 10 genes tested (*eft-1*, *hcp-4*, *top-1*, *smz-1*, *smz-1*, *gsp-3*, *gsp-4*, F23B12.7, B0261.6, and F27C8.5).

We found a number of genes (C31H1.1, T28F2.4, C25D7.2, T27E7.1, F32E10.6, F21H7.5, *nex-1* (ZC155.1), and C05B5.5) with increased progeny numbers when compared statistically to the control group. Repeated RNAi analysis against these genes, however, did not show consistently high effects. The variability in the maximum progeny seen, an increase of progeny production of up to 10%, may be due to small changes in environmental factors, such as fluctuations in temperature or levels of food. The following genes showed larval arrest or lethality: B0511.6, C43E11.9, *efk-1* (F42E10A.10), Y48B6A.1, Y54E10A.10, ZK1193.5, *lpd-7* (R13A5.12), Y46E12BL.2.

Y75B8A.7 showed larval arrest and slow growth. C16C8.9 was strongly Egl. The following genes showed no or very slight/low penetrance defects: B0252.5, B0286.3, C05C12.5, *spch-2* (C10G11.9), *ppw-1* (C18E3.7), C25D7.12, C33G3.5, C39E9.6, C39H7.1, C45G9.10, C49C3.12, C52E4.7, *glh-2* (C55B7.1), E03H12.5, F07A5.2, F13E9.10, F18E9.7, F21H7.5, F25B4.5, F25E5.10, F25E5.7, F26A1.12, F26F4.2, F36D3.4, F36F12.5, F36F12.6, F36H12.8, *ifc-2* (F37B4.2), *lec-11* (F38A5.3), F42G9.1, F44G3.2, F46H5.7, *spe-11* (F48C1.7), F49C12.15, F53B6.4, F56A6.1, K01G5.5, K12H6.9, M151.5, R02D3.1, R13H9.5, T08G11.1, T22H6.2, T23B3.5, *qrs-4* (T25C8.3), T26A8.3, *spch-3* (T27A3.4), T27E7.1, *rsp-1* (W02B12.3), Y110A2AL.7, *lys-1* (Y22F5A.4), Y37E11B.10, Y38E10A.17, Y43F8A.2, Y48B6A.12, Y51A2D.8, Y76A2A.1, ZC116.3, ZC204.12, ZK1248.1, *htas-1* (ZK1251.1), ZK354.2, ZK39.8, ZK430.1, ZK512.8, and ZK945.3.

### **Antibodies and immunolocalization**

Anti-GSP-3 (W09C3.6) and GSP-4 (T03F1.5) rabbit (animals 1494 and 1495) and rat (animals 1496 and 1497) antibodies were raised and affinity purified against a C-terminal peptide CTFVMYKPTPKSMRRG. Anti-SPCH-1 (C04G2.8), SPCH-2 (C10G11.9), and SPCH-3 (T27A3.4) rabbit (animals 1338 and 1339) and rat (animals 1340 and 1341) antibodies were raised and affinity purified against the N-terminal peptide MPKSKSQKNKLRPRDSKGRFTPLADADRTV with a C-terminal cysteine linker. Anti-SMZ-1 (C25G4.6) and SMZ-2 (T21G5.4) rabbit antibodies (animals 2256 and 2257) were raised and affinity purified against the C-terminal peptide EQTQTHEIGHDHEGKALRKVK with an N-terminal cysteine-glycine linker. Anti-

HTAS-1 (ZK1251.1) rabbit antibodies (animals 2390 and 2391) were raised and affinity purified against the N-terminal peptide MARLKQRPNRILNTSTKTSSA with a C-terminal cysteine linker. Peptides were coupled to Imject mcKLH (Pierce) for injection and coupled to divinylsulfone (Sigma) for affinity purification. Covance Research Products, Inc. conducted all antibody production. The following antibodies were gifts: anti-SPE-11 from S. Strome<sup>18</sup>, anti-GLH-1 and anti-GLH-2 from K. Bennett<sup>19,20</sup>, anti-TOP-1 from H.-S. Koo<sup>21</sup>, anti-HCP-4<sup>CENP-C</sup>, anti-HCP-3<sup>CENP-A</sup>, and HCP-1 from L. Moore<sup>22-24</sup>. Monoclonal Ab D77, provided by J. Aris, recognizes Nop1p (yeast fibrillarin) and FIB-1 (*C. elegans* fibrillarin)<sup>15,25,26</sup>.

Immunostaining of gonads from wild-type or *him-8(e1489)* gravid hermaphrodites and males was conducted as described previously<sup>27</sup>. An alternative harsher methanol/acetone fixation method<sup>28</sup> was also used to rule out antibody inaccessibility of sperm chromatin. Under these conditions, we observed uniform distribution of histone H1 protein on chromosomes, while HCP-4<sup>CENP-C</sup> remained excluded from inner parts of sperm meiotic chromosomes (data not shown).

## SUPPLEMENTAL METHODS REFERENCES

1. L'Hernault, S.W. & Roberts, T.M. Cell biology of nematode sperm. *Methods Cell Biol.* **48**, 273-301. (1995).
2. Ward, S. & Miwa, J. Characterization of temperature-sensitive, fertilization-defective mutants of the nematode *Caenorhabditis elegans*. *Genetics* **88**, 285-303. (1978).
3. L'Hernault, S.W., Shakes, D.C. & Ward, S. Developmental genetics of chromosome I spermatogenesis-defective mutants in the nematode *Caenorhabditis elegans*. *Genetics* **120**, 435-52. (1988).
4. Iwasaki, K., McCarter, J., Francis, R. & Schedl, T. *emo-1*, a *Caenorhabditis elegans* Sec61p gamma homologue, is required for oocyte development and ovulation. *J. Cell Biol.* **134**, 699-714. (1996).
5. Aroian, R.V., Field, C., Pruliere, G., Kenyon, C. & Alberts, B.M. Isolation of actin-associated proteins from *Caenorhabditis elegans* oocytes and their localization in the early embryo. *Embo J.* **16**, 1541-9. (1997).
6. Ward, S. & Klass, M. The location of the major protein in *Caenorhabditis elegans* sperm and spermatocytes. *Dev. Biol.* **92**, 203-8. (1982).
7. Washburn, M.P., Wolters, D. & Yates, J.R., 3rd. Large scale analysis of the yeast proteome by multidimensional protein identification technology. *Nature Biotechnology* **19**, 242-7 (2001).
8. Eng, J.K., McCormack, A. & Yates, J.R., 3rd. An approach to correlate tandem mass spectral data of peptides with amino acid sequences in a protein database. *J. Am. Soc. Mass Spectrom.* **5**, 976-989 (1994).
9. Tabb, D.L., McDonald, W.H. & Yates, J.R., 3rd. DTASelect and Contrast: tools for assembling and comparing protein identifications from shotgun proteomics. *J. Proteome Research* **1**, 21-6 (2002).
10. Hagstrom, K.A., Holmes, V.F., Cozzarelli, N.R. & Meyer, B.J. *C. elegans* condensin promotes mitotic chromosome architecture, centromere organization, and sister chromatid segregation during mitosis and meiosis. *Genes Dev.* **16**, 729-42. (2002).
11. Lieb, J.D., Capowski, E.E., Meneely, P. & Meyer, B.J. DPY-26, a link between dosage compensation and meiotic chromosome segregation in the nematode. *Science* **274**, 1732-6. (1996).
12. Navarro, R.E., Shim, E.Y., Kohara, Y., Singson, A. & Blackwell, T.K. *cgh-1*, a conserved predicted RNA helicase required for gametogenesis and protection from physiological germline apoptosis in *C. elegans*. *Development* **128**, 3221-32 (2001).
13. Kawasaki, I. et al. The PGL family proteins associate with germ granules and function redundantly in *Caenorhabditis elegans* germline development. *Genetics* **167**, 645-61 (2004).
14. Gruidl, M.E. et al. Multiple potential germ-line helicases are components of the germ-line-specific P granules of *Caenorhabditis elegans*. *Proc. Natl. Acad. Sci. U S A* **93**, 13837-42 (1996).
15. MacQueen, A.J. & Villeneuve, A.M. Nuclear reorganization and homologous chromosome pairing during meiotic. *Genes. Dev.* **15**, 1674-87 (2001).

16. Fraser, A. et al. Functional genomic analysis of *C. elegans* chromosome I by systematic RNA. *Nature* **408**, 325-30 (2000).
17. Kamath, R.S. et al. Systematic functional analysis of the *Caenorhabditis elegans* genome using RNAi. *Nature* **421**, 231-7. (2003).
18. Browning, H. & Strome, S. A sperm-supplied factor required for embryogenesis in *C. elegans*. *Development* **122**, 391-404 (1996).
19. Kuznicki, K.A. et al. Combinatorial RNA interference indicates GLH-4 can compensate for GLH-1; these two P granule components are critical for fertility in *C. elegans*. *Development* **127**, 2907-16 (2000).
20. Smith, P. et al. The GLH proteins, *Caenorhabditis elegans* P granule components, associate with CSN-5 and KGB-1, proteins necessary for fertility, and with ZYX-1, a predicted cytoskeletal protein. *Dev. Biol.* **251**, 333-47 (2002).
21. Lee, M.H., Park, H., Shim, G., Lee, J. & Koo, H.S. Regulation of gene expression, cellular localization, and *in vivo* function of *Caenorhabditis elegans* DNA topoisomerase I. *Genes Cells* **6**, 303-12. (2001).
22. Moore, L.L., Morrison, M. & Roth, M.B. HCP-1, a protein involved in chromosome segregation, is localized to the centromere of mitotic chromosomes in *Caenorhabditis elegans*. *J. Cell Biol.* **147**, 471-80 (1999).
23. Moore, L.L. & Roth, M.B. HCP-4, a CENP-C like protein in *Caenorhabditis elegans*, is required for resolution of sister centromeres. *J. Cell Biol.* **153**, 1199-208 (2001).
24. Buchwitz, B.J., Ahmad, K., Moore, L.L., Roth, M.B. & Henikoff, S. A histone-H3-like protein in *C. elegans*. *Nature* **401**, 547-8. (1999).
25. Aris, J.P. & Blobel, G. Identification and characterization of a yeast nucleolar protein that is similar to a rat liver nucleolar protein. *J. Cell Biol.* **107**, 17-31 (1988).
26. Saijou, E., Fujiwara, T., Suzaki, T., Inoue, K. & Sakamoto, H. RBD-1, a nucleolar RNA binding protein, is essential for *Caenorhabditis*. *Nucleic Acids Res.* **32**, 1028-36 (2004).
27. Chu, D.S. et al. A molecular link between gene-specific and chromosome-wide transcriptional repression. *Genes Dev.* **16**, 796-805. (2002).
28. Strome, S. Fluorescence visualization of the distribution of microfilaments in gonads and early embryos of the nematode *Caenorhabditis elegans*. *J. Cell. Biol.* **103**, 2241-52 (1986).

**SUPPLEMENTAL FIGURE LEGENDS****Supplemental Figure 1 | Comparative analysis of spermatogenic and oogenic proteins copurified with chromatin.**

Comparative Analysis: All spermatogenic (1099) and oogenic proteins (812) that copurify with chromatin are compared to identify 132 abundant spermatogenesis-enriched proteins with  $\geq 3$  occurrences (Supplemental Table 1), 427 low abundance spermatogenic proteins with  $\leq 2$  occurrences (Supplemental Table 2) as well as 540 all shared proteins (Supplemental Table 3) and 272 oogenic proteins (Supplemental Table 4).

**Supplemental Figure 2 | Fractionation of spermatogenic and oogenic extracts.**

Purified chromatin from spermatogenic or oogenic germ cells and nuclei was resolved through SDS-PAGE and stained with Colloidal Blue. Molecular weights (MW) correspond to protein size markers (Mark). **a**, Spermatogenic samples. **b**, Oogenic samples. Starting material (Start), supernatant (Sup), chromatin wash (Wash), chromatin (Chrom). Proteins in the chromatin preparations were subsequently analyzed by MudPIT. Brackets delineate core histone proteins. Asterisk marks major sperm proteins.

**Supplemental Figure 3 | HCP-4<sup>CENP-C</sup> associates with mature sperm chromatin.**

**a-c**, Immunolocalization of kinetochore components on mature sperm chromatin. **a**, HCP-4<sup>CENP-C</sup>. **b**, HCP-3<sup>CENP-A</sup>. **c**, HCP-1. DNA is shown in red, antibody (Ab) staining in green. HCP-4<sup>CENP-C</sup>, an inner kinetochore protein, (white arrows) is associated with mature sperm chromatin, unlike the inner kinetochore component HCP-3<sup>CENP-A</sup> and outer kinetochore component HCP-1. This localization illustrates why HCP-4<sup>CENP-C</sup> was identified by mass spectrometric analysis as a sperm-enriched chromatin-associated

protein.

**Supplemental Figure 4 | Spermatogenesis defects caused by RNAi-induced disruption of genes encoding abundant spermatogenesis-enriched chromatin-associated proteins.**

**a**, DAPI-visualized nuclei from a dissected and fixed wild-type male gonad show the progression and maturation of germ cell nuclei. **b**, Schematic of DNA in different sperm meiotic stages numbered for reference in lower panels. **c-e**, DAPI stained nuclei within boxed region shown in **a**. **c**, uninjected control male derived from a *him-8(e1489)* strain. **d**, *gsp-3*(RNAi) and *gsp-4*(RNAi) [*glc seven phosphatase*]; *him-8(e1489)* male. **e**, *smz-1*(RNAi) and *smz-2*(RNAi) [*sperm meiosis pdz domain*]; *him-8(e1489)* male. In **d**, **e**, chromosome segregation defects are apparent (white arrows) as are some normal meiotic figures (circles).

**Supplemental Figure 5 | Defects caused by *top-1*(RNAi) and *rsp-6*(RNAi) are similar.**

**a-c**, Complete adult gonads dissected from wild-type and RNAi-treated hermaphrodites and males that were stained with DAPI. **a**, wild-type, **b**, *top-1*(RNAi) or **c**, *rsp-6*(RNAi) animals. Dotted white lines show outline of gonad. All gonads are at the same magnification. Small arrows indicate oocytes that have undergone endomitotic reduplication (Emo) but have not been ovulated. Regions within yellow boxes are enlarged in insets. Large white arrowheads mark abnormally large sperm nuclei in comparison to normal mature sperm nuclei (small yellow arrows), suggesting

chromosome compaction or segregation defects.

## **SUPPLEMENTAL TABLE LEGENDS**

### **Supplemental Table 6 | Summary of RNAi analysis of abundant spermatogenesis-enriched proteins copurified with chromatin.**

Column headers are defined as follows:

Predicted gene, the predicted Open Reading Frame (ORF) corresponding to each protein from a set of identifying peptides.

*C. elegans* locus, gene name assigned for ORF.

Descriptor, protein description provided in WormBase or Worm Protein Database, (BIOBASE) annotations.

Previous Phenotype, previous RNAi phenotypes observed (see Wormbase).

Sterility Category, is defined by statistically significant variation (P-values are shown in parenthesis) in the following four categories:

% Progeny Production of Control, the average number of viable F2 progeny from 10 F1 progeny of injected animals divided by the average number of F2 progeny from 10 F1 progeny of uninjected animals. Statistically significant differences ( $P \leq 0.04$ ) were determined using a standard T test.

Progeny No. Variability, significantly high variations ( $P \leq 0.04$ ) in number of embryos laid or viable progeny between broods of 10 F1 animals scored as determined by a standard F-test.

% Oocytes, significantly high ( $P \leq 0.04$ ) percentage of oocytes laid as determined by T-test.



% Embryonic Lethality, significantly high ( $P \leq 0.04$ ) percentage of dead embryos produced as determined by T-test.

Cytological Defects, indicates if defects were observed in DAPI stained gonads of progeny of injected animals.

Sex Specificity, indicates if any defects observed were sperm specific.

New Evidence for Fertility Function (this study), indicates new information gained in this study about the function of the predicated gene in fertility.

Overall RNAi Class, degree of severity of RNAi phenotype observed in this study (number of animals exhibiting phenotype and the level of defect observed in each animal).

Complete F1 Lethality, all F1 progeny of injected animals died as embryos (Emb) or embryos and larvae (Emb Lva/Lvl).

Complete F1 Sterility, F1 progeny of injected animals were sterile.

High Ste, F1 progeny produce a significantly low number of embryos or viable progeny with P value  $\leq 0.00001$ .

High Male Ste, F1 progeny produce a significantly low number of embryos or viable progeny with P value  $\leq 0.00001$  and sperm-specific defects.

Moderate Ste, F1 progeny produce a significantly low number of embryos or viable progeny with P value  $\leq 0.00001 > 0.04$

Low Ste, overall F1 progeny production not statistically different than control, but show significant levels of progeny number variability, % oocytes, or % embryonic lethality with P values  $< 0.04$  or consistent cytological defects.

\*, †, § symbols denote highly identical genes whose products may be depleted simultaneously by RNAi. **Bolded text** denotes the new evidence from our study that indicates a role for the protein in fertility. Abbreviations: N/A, not applicable, Ste, sterile; Stp, sterile progeny; Lva, larval arrest; Pvl, protruding vulva; Mul, multi-nuclei in early embryo; Mlt, molting defective; Him, high incidence of males; Rvp, exploded; Gro, slow growth; Dpy, dumpy; Lvl, larval lethal; Emb, embryonic lethal; Sck, sick.

Supplemental Figure 1

All spermatogenic proteins copurified with chromatin (1099)

### Comparative Analysis

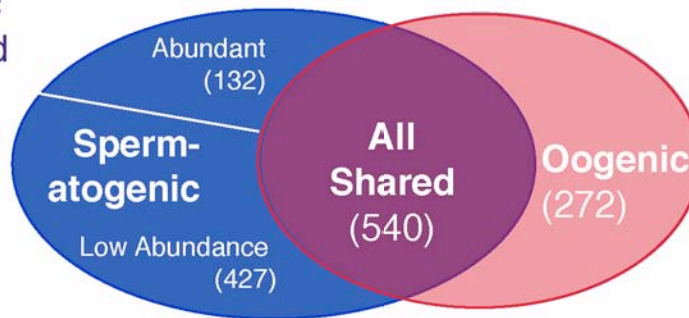

All oogenic proteins copurified with chromatin (812)

Supplemental Figure 2

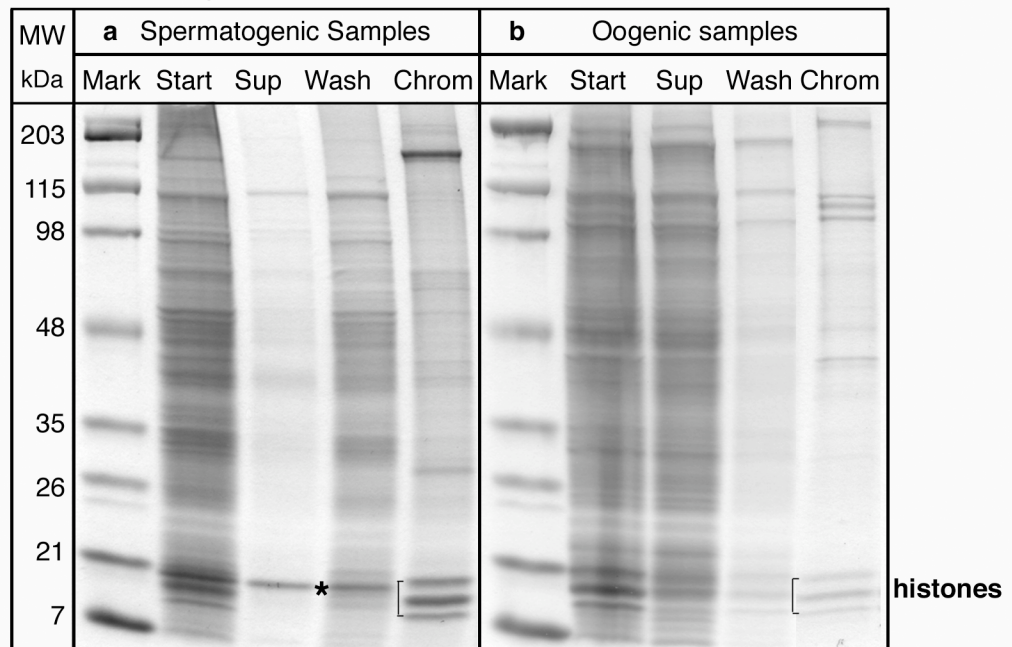

Supplemental Figure 3:

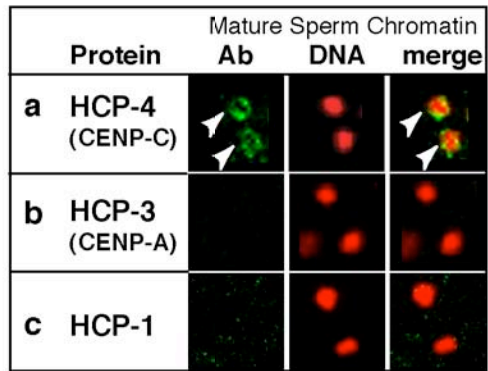

Supplemental Figure 4

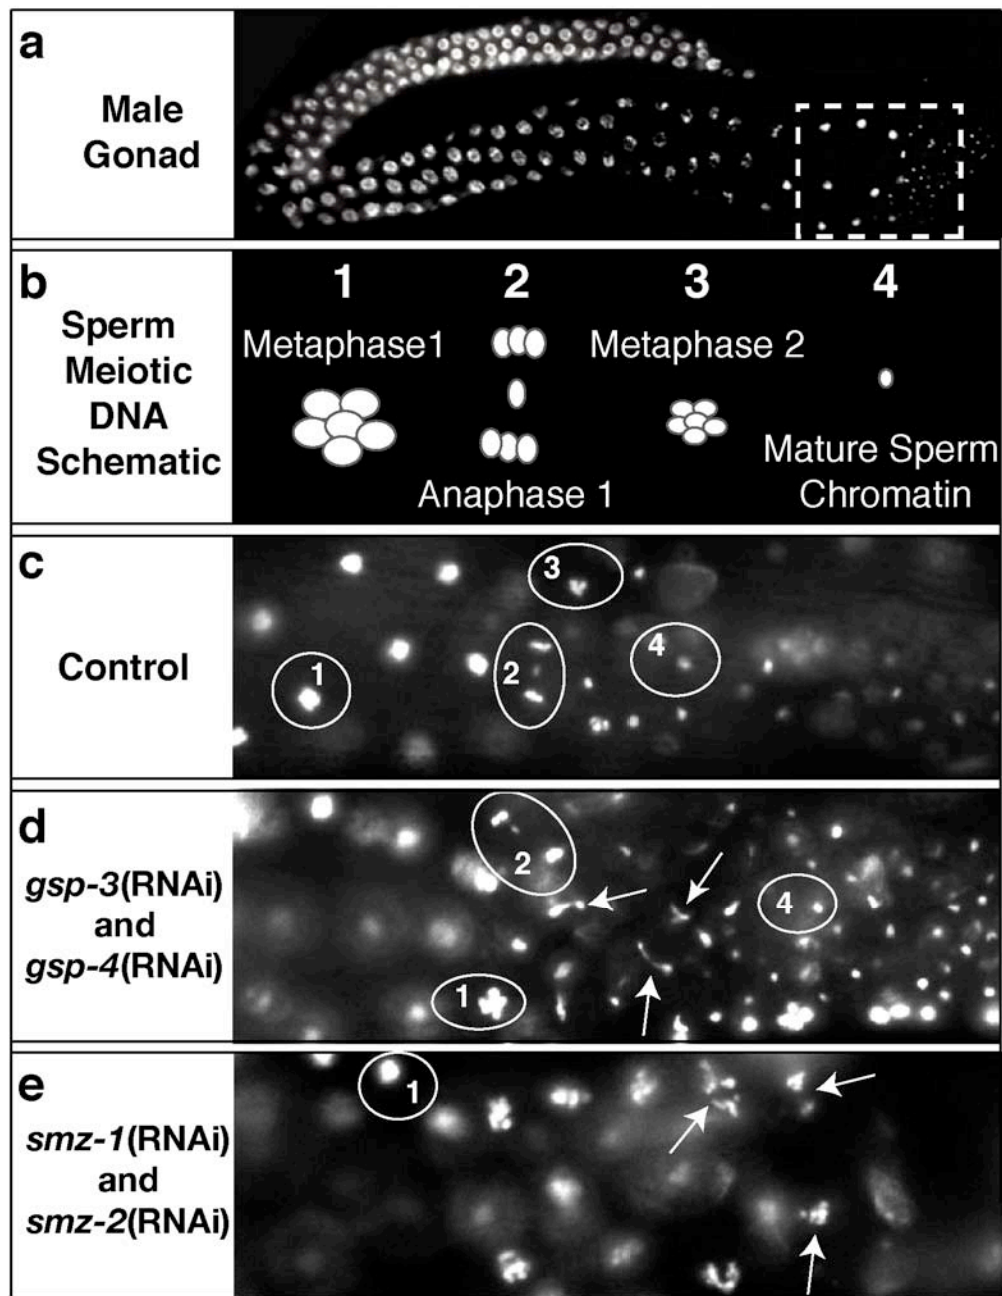

Supplemental Figure 5

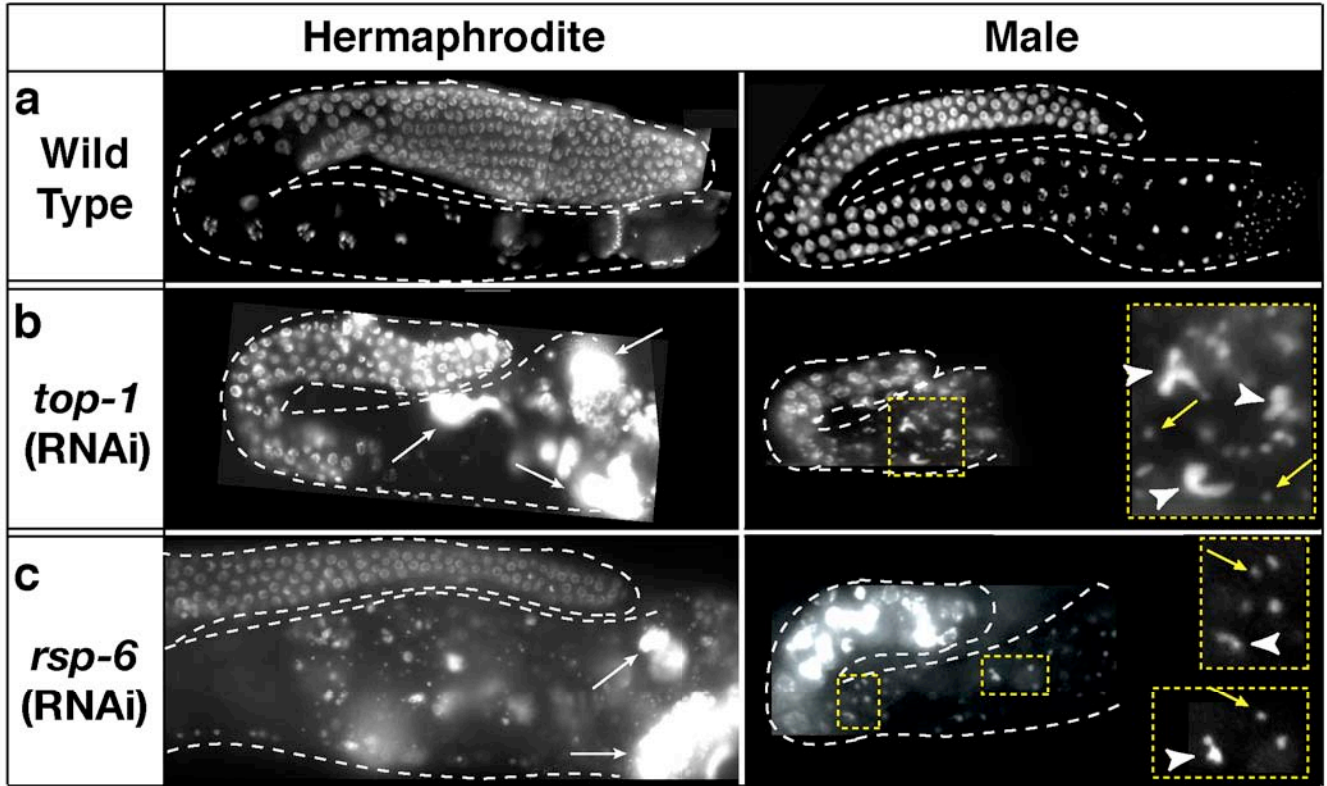

Supplemental Table 1 Abundant spermatogenesis-enriched proteins copurified with chromatin (132)

| Functional Category  | Predicted Gene | Family ID (when peptides identify more than 1 protein) | C. elegans Locus | LG  | Abundance   |                      | Sequence Count | Coverage (%) | Length | Descriptor                                               |
|----------------------|----------------|--------------------------------------------------------|------------------|-----|-------------|----------------------|----------------|--------------|--------|----------------------------------------------------------|
|                      |                |                                                        |                  |     | Occurrences | Total Spectrum Count |                |              |        |                                                          |
| DNA                  | F23B12.7       | F23B12.7                                               |                  | V   | 5           | 35                   | 13             | 12.7         | 953    | CCAAT binding factor 1 protein like, txn factor          |
| DNA                  | C18G1.5        | C18G1.5                                                | <i>hil-4</i>     | V   | 5           | 25                   | 12             | 15.8         | 253    | Histone H1                                               |
| DNA                  | ZK1251.1       | ZK1251.1                                               | <i>htas-1</i>    | IV  | 4           | 31                   | 8              | 26.2         | 145    | Histone H2A variant                                      |
| DNA                  | B0414.3        | B0414.3                                                | <i>hil-5</i>     | I   | 3           | 28                   | 11             | 19.6         | 225    | Histone H1                                               |
| DNA                  | K04C2.2        | K04C2.2                                                |                  | III | 3           | 23                   | 8              | 9.6          | 990    | DNA polymerase V                                         |
| DNA                  | ZK1193.5       | ZK1193.5                                               |                  | X   | 3           | 17                   | 3              | 10.9         | 596    | Homeobox                                                 |
| DNA                  | T03F1.9        | T03F1.9                                                | <i>hcp-4</i>     | I   | 3           | 10                   | 7              | 14.5         | 866    | Centromere protein CENP-C                                |
| DNA                  | M01E5.5        | M01E5.5                                                | <i>top-1</i>     | I   | 3           | 9                    | 4              | 8.3          | 806    | Topoisomerase I                                          |
| RNA                  | K01G5.5        | K01G5.5                                                |                  | III | 5           | 70                   | 26             | 41.8         | 445    | dyskerin, RNA processing                                 |
| RNA                  | Y54F10BM.2     | Y54F10BM.2                                             |                  | III | 5           | 29                   | 14             | 13.5         | 1173   | Elongation factor Tu domain 2                            |
| RNA                  | ZK328.2        | ZK328.2                                                | <i>eft-1</i>     | III | 5           | 22                   | 12             | 22.3         | 974    | elongation factor 2                                      |
| RNA                  | C33H5.12       | C33H5.12                                               | <i>rsp-6</i>     | IV  | 5           | 21                   | 8              | 25.1         | 179    | RNA binding protein - SR protein                         |
| RNA                  | ZK945.3        | ZK945.3                                                |                  | II  | 5           | 17                   | 7              | 13.6         | 766    | pumilio-repeat like domain                               |
| RNA                  | W07E6.1        | W07E6.1                                                |                  | II  | 4           | 34                   | 17             | 26.8         | 664    | NOL1/NOP2/sun family ribosomal subunit biogenesis        |
| RNA                  | JC8.3          | JC8.3                                                  | <i>rpl-12</i>    | IV  | 4           | 34                   | 10             | 45.5         | 165    | Ribosomal protein                                        |
| RNA                  | C16A3.3        | C16A3.3                                                |                  | III | 4           | 25                   | 19             | 14.6         | 1743   | spliceosome assembly; in mouse apoptosis                 |
| RNA                  | C55B7.1        | C55B7.1                                                | <i>glh-2</i>     | I   | 4           | 19                   | 15             | 7.9          | 974    | RNA helicase HAGE testes                                 |
| RNA                  | F36A4.7        | F36A4.7                                                | <i>ama-1</i>     | IV  | 4           | 14                   | 10             | 11.1         | 1852   | RNA polymerase II                                        |
| RNA                  | T07A9.9        | T07A9.9                                                |                  | IV  | 4           | 13                   | 8              | 17.9         | 681    | Small GTP-binding protein domain (ribosome biogenesis)   |
| RNA                  | Y48A6B.3       | Y48A6B.3                                               |                  | II  | 3           | 25                   | 15             | 65           | 163    | Ribosomal protein, rRNA processing                       |
| RNA                  | Y111B2A.18     | Y111B2A.18                                             | <i>rsp-3</i>     | III | 3           | 21                   | 5              | 20.9         | 235    | RNA binding protein - SR protein                         |
| RNA                  | C43E11.9       | C43E11.9                                               |                  | I   | 3           | 19                   | 10             | 37.8         | 180    | RNA binding                                              |
| RNA                  | Y48B6A.1       | Y48B6A.1                                               |                  | II  | 3           | 19                   | 10             | 19.6         | 674    | Ribosomal protein L7Ae                                   |
| RNA                  | B0511.6        | B0511.6                                                |                  | I   | 3           | 16                   | 6              | 13.2         | 544    | RNA helicase                                             |
| RNA                  | C32E8.2        | C32E8.2                                                | <i>rpl-13</i>    | I   | 3           | 16                   | 4              | 13           | 207    | Ribosomal protein                                        |
| RNA                  | Y75B8A.7       | Y75B8A.7                                               |                  | III | 3           | 15                   | 8              | 21.9         | 648    | MPP10, small nucleolar ribonucleoprotein                 |
| RNA                  | C18E3.7        | <i>ppw-1/F56A6.1</i>                                   | <i>ppw-1</i>     | I   | 3           | 14                   | 8              | 12.5         | 913    | Paz/piwi domain; RNAi                                    |
| RNA                  | F56A6.1        | <i>ppw-1/F56A6.1</i>                                   |                  | IV  | 3           | 14                   | 8              | 12.9         | 887    | Paz/piwi domain                                          |
| RNA                  | K12H4.3        | K12H4.3                                                |                  | III | 3           | 14                   | 6              | 24.1         | 352    | Brix domain-Ribosome biogenesis                          |
| RNA                  | E04A4.8        | E04A4.8                                                | <i>rpl-20</i>    | IV  | 3           | 14                   | 4              | 19.4         | 180    | Ribosomal protein                                        |
| RNA                  | ZK430.1        | ZK430.1                                                |                  | II  | 3           | 13                   | 9              | 7.9          | 1650   | HEAT, ARM repeat domain, yeast Nucleolar protein homolog |
| RNA                  | D1007.6        | D1007.6                                                | <i>rps-10</i>    | I   | 3           | 13                   | 8              | 38.9         | 149    | 40S ribosomal protein S10                                |
| RNA                  | R13A5.12       | R13A5.12                                               | <i>lpd-7</i>     | III | 3           | 13                   | 5              | 16.8         | 531    | Pescadillo, N-terminal, BRCA1 C Terminus,                |
| RNA                  | W02B12.3       | W02B12.3                                               | <i>rsp-1</i>     | III | 3           | 12                   | 9              | 9.3          | 312    | pre-mRNA splicing factor like -SR protein                |
| RNA                  | F25B4.5        | F25B4.5                                                |                  | V   | 3           | 11                   | 6              | 10.7         | 710    | RNA-processing protein, HAT helix                        |
| RNA                  | C18A3.3        | C18A3.3                                                |                  | II  | 3           | 11                   | 4              | 16.8         | 340    | rRNA processing                                          |
| RNA                  | Y54E10A.10     | Y54E10A.10                                             |                  | I   | 3           | 10                   | 6              | 13.8         | 297    | Brix domain-Ribosome biogenesis                          |
| RNA                  | F55F8.2        | F55F8.2                                                |                  | I   | 3           | 10                   | 5              | 13.5         | 746    | DEAD box RNA helicase                                    |
| Housekeeping         | K03H1.1        | K03H1.1                                                | <i>gln-2</i>     | III | 6           | 215                  | 62             | 61.3         | 367    | Glutamine synthetase, catalytic domain                   |
| Housekeeping         | T25C8.3        | T25C8.3                                                | <i>gln-4</i>     | III | 6           | 145                  | 44             | 46.2         | 290    | glutamine synthetase family                              |
| Housekeeping         | F44G3.2        | F44G3.2                                                |                  | V   | 5           | 48                   | 10             | 13.2         | 372    | arginine kinase                                          |
| Housekeeping         | F07A11.2       | F07A11.2                                               |                  | II  | 5           | 27                   | 11             | 25.5         | 725    | glucosamine-fructose-6-phosphate                         |
| Housekeeping         | C17G10.8       | C17G10.8                                               | <i>dhs-6</i>     | II  | 4           | 45                   | 22             | 43.1         | 418    | alcohol dehydrogenase                                    |
| Housekeeping         | F54C8.1        | F54C8.1                                                |                  | III | 4           | 34                   | 9              | 25.8         | 298    | 3-hydroxyacyl-CoA dehydrogenase                          |
| Housekeeping         | Y71H10A.1      | Y71H10A.1                                              |                  | X   | 4           | 12                   | 6              | 10.3         | 814    | Phosphofructokinase                                      |
| Housekeeping         | F26E4.9        | F26E4.9                                                | <i>cco-1</i>     | I   | 3           | 21                   | 9              | 54.5         | 132    | cytochrome C oxidase                                     |
| Housekeeping         | R02D3.1        | R02D3.1                                                |                  | IV  | 3           | 16                   | 11             | 17.3         | 934    | Saccharopine dehydrogenase                               |
| Housekeeping         | Y48B6A.12      | Y48B6A.12                                              |                  | III | 3           | 16                   | 8              | 20.2         | 620    | Malic oxidoreductase                                     |
| Housekeeping         | T13A10.11      | T13A10.11                                              |                  | IV  | 3           | 12                   | 12             | 37.6         | 404    | S-adenosylmethionine synthetase                          |
| Housekeeping         | C30F12.7       | C30F12.7                                               |                  | I   | 3           | 9                    | 9              | 26.8         | 373    | isocitrate dehydrogenase                                 |
| Housekeeping         | B0286.3        | B0286.3                                                |                  | II  | 3           | 8                    | 4              | 4.7          | 423    | SAICAR synthetase                                        |
| Housekeeping         | T22H6.2        | T22H6.2                                                |                  | X   | 3           | 7                    | 5              | 9.6          | 800    | 1-pyroline-5-carboxylate synthetase                      |
| Cytoskeletal         | F37B4.2        | F37B4.2                                                | <i>ifc-1</i>     | V   | 3           | 23                   | 11             | 21.8         | 500    | intermediate filament protein                            |
| Signalling           | T03F1.5        | T03F1.5/W09C3.6                                        | <i>gsp-4</i>     | I   | 5           | 27                   | 13             | 40           | 305    | serine/threonine protein phosphatase PP1                 |
| Signalling           | W09C3.6        | T03F1.5/W09C3.6                                        | <i>gsp-3</i>     | I   | 5           | 27                   | 13             | 40           | 305    | serine/threonine protein phosphatase PP1                 |
| Signalling           | C25G4.6        | C25G4.6                                                | <i>smz-1</i>     | IV  | 5           | 18                   | 9              | 28.5         | 274    | PDZ domain                                               |
| Signalling           | C39H7.1        | C39H7.1                                                |                  | IV  | 4           | 35                   | 15             | 26           | 308    | casein kinase                                            |
| Signalling           | Y38H8A.3       | Y38H8A.3                                               |                  | IV  | 4           | 35                   | 15             | 26           | 308    | serine/threonine kinase                                  |
| Signalling           | T21G5.4        | T21G5.4                                                | <i>smz-2</i>     | I   | 4           | 16                   | 7              | 21.2         | 274    | PDZ domain                                               |
| Signalling           | F36H12.8       | F36H12.8/R13H9.5                                       |                  | IV  | 3           | 20                   | 10             | 7.4          | 311    | serine/threonine kinase                                  |
| Signalling           | R13H9.5        | F36H12.8/R13H9.5                                       |                  | IV  | 3           | 20                   | 10             | 7.4          | 311    | serine/threonine kinase                                  |
| Signalling           | ZK354.2        | ZK354.2                                                |                  | IV  | 3           | 11                   | 4              | 20           | 390    | serine/threonine kinase                                  |
| Signalling           | F42G9.1        | F42G9.1                                                |                  | III | 3           | 10                   | 7              | 18.9         | 491    | protein phosphatase 2C gamma                             |
| Signalling           | F42A10.4       | F42A10.4                                               | <i>efk-1</i>     | III | 3           | 9                    | 6              | 9            | 687    | calcium/calmodulin-dependent protein kinase              |
| Major Sperm          | F53B6.4        | F53B6.4                                                |                  | I   | 4           | 125                  | 23             | 27.8         | 342    | Major Sperm Protein domain                               |
| Major Sperm          | F21H7.5        | F21H7.5                                                |                  | V   | 4           | 116                  | 24             | 35.3         | 306    | Major Sperm Protein domain                               |
| Major Sperm          | C25D7.12       | C25D7.12/C25D7.2                                       |                  | V   | 4           | 85                   | 18             | 12.9         | 341    | Major Sperm Protein domain                               |
| Major Sperm          | C25D7.2        | C25D7.12/C25D7.2                                       |                  | V   | 4           | 85                   | 18             | 15.4         | 286    | Major Sperm Protein domain                               |
| Major Sperm          | F36D3.4        | F36D3.4                                                |                  | V   | 4           | 65                   | 19             | 22.1         | 285    | Major Sperm Protein domain                               |
| Extracellular Matrix | C49C3.12       | C49C3.12                                               |                  | IV  | 6           | 65                   | 18             | 48.1         | 214    | Lectin C-type domain                                     |
| Extracellular Matrix | ZK39.8         | ZK39.8                                                 |                  | I   | 5           | 29                   | 11             | 40.3         | 226    | Lectin C-type domain                                     |
| Extracellular Matrix | F38A5.3        | F38A5.3                                                | <i>lec-11</i>    | IV  | 4           | 37                   | 14             | 33.2         | 232    | Lectin                                                   |
| Extracellular Matrix | Y52B11A.5      | Y52B11A.5                                              |                  | V   | 4           | 15                   | 11             | 31.5         | 219    | Lectin C-type domain                                     |
| Extracellular Matrix | F26A1.12       | F26A1.12                                               |                  | III | 3           | 28                   | 13             | 31.2         | 231    | Lectin C-type domain                                     |
| Extracellular Matrix | C49C3.11       | C49C3.11                                               |                  | IV  | 3           | 16                   | 9              | 17.6         | 404    | lectin/insulin IGF                                       |
| Extracellular Matrix | F36F12.6       | F36F12.6                                               |                  | V   | 3           | 16                   | 6              | 36.8         | 223    | Lectin                                                   |
| Extracellular Matrix | C39E9.6        | C39E9.6                                                |                  | IV  | 3           | 14                   | 5              | 24.8         | 210    | SCP-like extracellular Proteins                          |
| Extracellular Matrix | F36F12.5       | F36F12.5                                               |                  | V   | 3           | 12                   | 5              | 32.3         | 223    | Lectin C-type domain                                     |
| Other                | F48C1.7        | F48C1.7                                                | <i>spe-11</i>    | I   | 6           | 49                   | 23             | 39.1         | 299    | Paternally provided protein essential for embryogenesis  |
| Other                | Y51A2D.8       | Y51A2D.8                                               |                  | V   | 4           | 27                   | 7              | 19.4         | 386    | Cysteine protease                                        |
| Other                | B0365.3        | B0365.3                                                | <i>eat-6</i>     | V   | 4           | 12                   | 9              | 9.4          | 996    | Na(+)/K(+) ATPase alpha subunit                          |
| Other                | ZK1248.1       | ZK1248.1                                               |                  | II  | 4           | 12                   | 9              | 11.6         | 491    | Peptidase family M13                                     |
| Other                | F25E5.3        | F25E5.3                                                |                  | V   | 3           | 57                   | 13             | 35.8         | 377    | serine protease domain                                   |
| Other                | Y22F5A.4       | Y22F5A.4                                               | <i>lys-1</i>     | V   | 3           | 21                   | 7              | 31.5         | 298    | LYSozyme gene class                                      |
| Other                | ZC155.1        | ZC155.1                                                | <i>nex-1</i>     | III | 3           | 15                   | 9              | 18.9         | 322    | Annexin                                                  |
| Other                | F25E5.10       | F25E5.10                                               |                  | V   | 3           | 14                   | 8              | 20.9         | 401    | serine proteases                                         |
| Unknown              | M151.5         | M151.5                                                 |                  | II  | 6           | 629                  | 11             | 16           | 456    | f-box (ub conjugation)                                   |
| Unknown              | B0207.5        | B0207.5                                                |                  | I   | 6           | 252                  | 119            | 28.3         | 3696   | SNF2 related N-term domain                               |



Supplemental Table 1 Abundant spermatogenesis-enriched proteins copurified with chromatin (≥3 occurrences)

| Functional Category | Predicted Gene | Family ID (when peptides identify more than 1 protein) | C. elegans Locus | LG            | Abundance   |                      | Sequence Count | Coverage (%) | Length                                          | Descriptor                  |
|---------------------|----------------|--------------------------------------------------------|------------------|---------------|-------------|----------------------|----------------|--------------|-------------------------------------------------|-----------------------------|
|                     |                |                                                        |                  |               | Occurrences | Total Spectrum Count |                |              |                                                 |                             |
| Unknown             | C04G2.8        | C04G2.8                                                | <i>spch-1</i>    | IV            | 6           | 144                  | 14             | 6.6          | 197                                             | SNBP-like                   |
| Unknown             | F49C12.15      | F49C12.15                                              |                  | IV            | 6           | 129                  | 41             | 42.1         | 869                                             |                             |
| Unknown             | F13E9.10       | F13E9.10                                               |                  | IV            | 6           | 106                  | 18             | 45.4         | 229                                             |                             |
| Unknown             | F18E9.7        | F18E9.7                                                |                  | X             | 6           | 67                   | 21             | 32.2         | 395                                             |                             |
| Unknown             | C45G9.10       | C45G9.10                                               |                  | III           | 5           | 43                   | 15             | 16.3         | 971                                             |                             |
| Unknown             | F14D2.7        | F14D2.7                                                |                  | II            | 5           | 39                   | 2              | 5.9          | 471                                             |                             |
| Unknown             | Y110A2AL.7     | Y110A2AL.7                                             |                  | II            | 5           | 34                   | 19             | 32.1         | 162                                             |                             |
| Unknown             | T26A8.3        | T26A8.3                                                |                  | IV            | 5           | 33                   | 8              | 36.4         | 162                                             | Transthyretin-like          |
| Unknown             | ZC204.12       | ZC204.12                                               |                  | II            | 5           | 29                   | 14             | 18.7         | 252                                             | BTB POZ domain              |
| Unknown             | K12H6.9        | K12H6.9                                                |                  | II            | 5           | 29                   | 11             | 44.2         | 154                                             |                             |
| Unknown             | C16C8.9        | C16C8.9                                                | II               | 5             | 22          | 10                   | 41.4           | 157          |                                                 |                             |
| Unknown             | T08G11.1       | T08G11.1                                               | I                | 5             | 19          | 13                   | 7.6            | 3212         |                                                 |                             |
| Unknown             | K08C9.2        | K08C9.2                                                | I                | 5             | 16          | 9                    | 46.4           | 235          |                                                 |                             |
| Unknown             | T28F2.4        | T28F2.4                                                | I                | 5             | 16          | 9                    | 11.1           | 748          | Cupin domain                                    |                             |
| Unknown             | C10G11.9       | C10G11.9/T27A3.4                                       | <i>spch-2</i>    | I             | 4           | 79                   | 1              | 7.4          | 203                                             | SNBP-like                   |
| Unknown             | T27A3.4        | C10G11.9/T27A3.4                                       |                  | <i>spch-3</i> | I           | 4                    | 79             | 1            | 7.4                                             | 203                         |
| Unknown             | C33G3.5        | C33G3.5                                                | X                |               | 4           | 39                   | 9              | 16.3         | 435                                             |                             |
| Unknown             | F27C8.5        | F27C8.5                                                | IV               | 4             | 23          | 11                   | 20.5           | 565          | BTB/POZ domain                                  |                             |
| Unknown             | F36A2.7        | F36A2.7                                                | I                | 4             | 18          | 8                    | 30.5           | 167          |                                                 |                             |
| Unknown             | E03H12.5       | E03H12.5                                               | IV               | 4             | 18          | 8                    | 35.7           | 210          |                                                 |                             |
| Unknown             | F26F4.2        | F26F4.2                                                | III              | 4             | 16          | 7                    | 39.2           | 181          |                                                 |                             |
| Unknown             | F25E5.7        | F25E5.7                                                | V                | 4             | 10          | 4                    | 7.3            | 673          | BTB/POZ domain. Serine protease, trypsin family |                             |
| Unknown             | C05C12.5       | C05C12.5                                               | IV               | 3             | 33          | 6                    | 47.7           | 149          |                                                 |                             |
| Unknown             | ZK512.8        | ZK512.8                                                | III              | 3             | 30          | 14                   | 54.4           | 171          |                                                 |                             |
| Unknown             | B0252.5        | B0252.5                                                | II               | 3             | 29          | 8                    | 25.9           | 301          |                                                 |                             |
| Unknown             | T27E7.1        | T27E7.1                                                | IV               | 3             | 23          | 9                    | 34.5           | 226          |                                                 |                             |
| Unknown             | T23B3.5        | T23B3.5                                                | I                | 3             | 19          | 6                    | 31.8           | 211          |                                                 |                             |
| Unknown             | T10E9.4        | T10E9.4                                                | I                | 3             | 18          | 9                    | 18.5           | 693          |                                                 |                             |
| Unknown             | C14F11.7       | C14F11.7                                               | X                | 3             | 18          | 6                    | 35.4           | 82           |                                                 |                             |
| Unknown             | Y38E10A.17     | Y38E10A.17                                             | II               | 3             | 17          | 11                   | 30.5           | 586          |                                                 |                             |
| Unknown             | F07A5.2        | F07A5.2                                                | I                | 3             | 17          | 10                   | 14.5           | 310          |                                                 |                             |
| Unknown             | Y37E11B.10     | Y37E11B.10                                             | IV               | 3             | 17          | 10                   | 21.5           | 511          |                                                 |                             |
| Unknown             | F46H5.7        | F46H5.7                                                | X                | 3             | 17          | 9                    | 19.9           | 572          |                                                 |                             |
| Unknown             | B0261.6        | B0261.6                                                | I                | 3             | 12          | 9                    | 16.3           | 153          |                                                 |                             |
| Unknown             | C31H1.1        | C31H1.1                                                | IV               | 3             | 11          | 7                    | 16.7           | 693          |                                                 |                             |
| Unknown             | Y43F8A.2       | Y43F8A.2                                               | V                | 3             | 11          | 7                    | 11             | 502          |                                                 |                             |
| Unknown             | Y76A2A.1       | Y76A2A.1                                               | <i>tag-164</i>   | III           | 3           | 11                   | 7              | 24.8         | 294                                             |                             |
| Unknown             | C05B5.5        | C05B5.5                                                |                  | III           | 3           | 11                   | 6              | 2.7          | 585                                             |                             |
| Unknown             | ZC116.3        | ZC116.3                                                |                  | V             | 3           | 10                   | 9              | 5.3          | 3871                                            | CUB domain, EGF-like domain |
| Unknown             | F38A5.6        | F38A5.6                                                |                  | IV            | 3           | 10                   | 4              | 31.6         | 263                                             |                             |
| Unknown             | ZK809.3        | ZK809.3                                                |                  | IV            | 3           | 10                   | 6              | 18.1         | 210                                             |                             |
| Unknown             | Y46E12BL.2     | Y46E12BL.2                                             |                  | II            | 3           | 9                    | 5              | 3.4          | 1334                                            |                             |
| Unknown             | Y45F3A.1       | Y45F3A.1                                               |                  | III           | 3           | 7                    | 5              | 29.5         | 329                                             |                             |
| Unknown             | C52E4.7        | C52E4.7                                                |                  | V             | 3           | 7                    | 3              | 15.5         | 284                                             |                             |

Functional Category determination is described in Supplemental Methods; Family ID, designation for families of proteins not differentiated by a set of identifying peptides; LG, chromosomal location; Occurrences, the number of preparations in which a protein was identified out of 6 spermatogenic preparations; Total Spectrum Count, the total number of peptides detected for each protein from all preparations; Sequence Count, the number of distinct MS/MS spectra collected from all preparations; Coverage, % of protein represented by uniquely identified peptides; Length, number of amino acids in protein; Descriptor, protein description through homology or provided in WormBase, Worm Protein Database (BIOBASE) annotations.

Supplemental Table 2 Low abundance spermatogenic proteins copurified with chromatin (427)

| Functional Category | Predicted Gene | Family ID (when peptides identify more than 1 protein) | C. elegans locus | LG  | Abundance  |                      | Sequence Count | Coverage (%) | Length | Descriptor                                             |
|---------------------|----------------|--------------------------------------------------------|------------------|-----|------------|----------------------|----------------|--------------|--------|--------------------------------------------------------|
|                     |                |                                                        |                  |     | Occurrence | Total Spectrum Count |                |              |        |                                                        |
| DNA                 | T20B12.8       | T20B12.8                                               | <i>hmg-4</i>     | III | 2          | 8                    | 13             | 12.9         | 697    | HMG transcription factor gene class                    |
| DNA                 | F46F11.2       | F46F11.2                                               | <i>cey-2</i>     | I   | 2          | 5                    | 11             | 33.3         | 267    | cold-shock Y-box DNA binding domain                    |
| DNA                 | Y48E1A.1       | Y48E1A.1                                               |                  | II  | 2          | 7                    | 8              | 8.1          | 1737   | DNA-directed RNA polymerase I largest subunit          |
| DNA                 | Y67D2.3        | Y67D2.3                                                |                  | III | 2          | 4                    | 6              | 23.7         | 156    | Zn Finger                                              |
| DNA                 | F55A3.7        | F55A3.7                                                |                  | I   | 2          | 2                    | 6              | 6            | 498    | transcription factor                                   |
| DNA                 | F14B4.3        | F14B4.3                                                |                  | I   | 2          | 3                    | 4              | 6.9          | 1127   | DNA-directed RNA polymerase I                          |
| DNA                 | R166.4         | R166.4                                                 | <i>pro-1</i>     | II  | 1          | 4                    | 8              | 13.4         | 529    | G-protein WD-40 repeat, RCC                            |
| DNA                 | F23H11.1       | F23H11.1                                               |                  | III | 1          | 2                    | 6              | 7            | 214    | Zn finger                                              |
| DNA                 | Y39B6A.47      | Y39B6A.47                                              |                  | V   | 1          | 4                    | 5              | 5.4          | 900    | nuclear hormone receptor                               |
| DNA                 | F54D5.14       | F54D5.14                                               |                  | II  | 1          | 2                    | 5              | 2.6          | 1130   | SMC like protein, RAD18                                |
| DNA                 | F32A11.5       | F32A11.5                                               |                  | II  | 1          | 2                    | 5              | 7.6          | 263    | DNA topoisomerase II (N-terminal region) (2 domains)   |
| DNA                 | F31E3.3        | F31E3.3                                                | <i>rfc-4</i>     | III | 1          | 2                    | 5              | 12           | 334    | Replication factor C AAA ATPase                        |
| DNA                 | C24G6.1        | C24G6.1                                                | <i>syp-2</i>     | V   | 1          | 2                    | 5              | 14.6         | 213    | SynaPsis in meiosis abnormal gene class                |
| DNA                 | T27F2.1        | T27F2.1                                                | <i>skp-1</i>     | V   | 1          | 3                    | 4              | 12.5         | 535    | transcriptional regulator, SKIP/SNW domain             |
| DNA                 | M01E11.5       | M01E11.5                                               | <i>cey-3</i>     | I   | 1          | 3                    | 4              | 24.5         | 265    | cold-shock DNA binding domain                          |
| DNA                 | F46B6.7        | F46B6.7                                                |                  | V   | 1          | 3                    | 4              | 6.5          | 614    | Zinc finger, C2H2 type                                 |
| DNA                 | ZK381.1        | ZK381.1                                                | <i>him-3</i>     | IV  | 1          | 2                    | 4              | 12           | 291    | Meiosis-specific protein                               |
| DNA                 | F27E5.3        | F27E5.3                                                |                  | II  | 1          | 2                    | 4              | 7.8          | 490    | homeobox domain                                        |
| DNA                 | F27D4.4        | F27D4.4                                                |                  | I   | 1          | 3                    | 3              | 9.4          | 383    | Zn Finger                                              |
| DNA                 | ZK1128.5       | ZK1128.5                                               |                  | III | 1          | 2                    | 3              | 10.5         | 446    | homolog of Swp73/BAF60, SWI/SNF component              |
| DNA                 | ZC302.1        | ZC302.1                                                | <i>mre-11</i>    | V   | 1          | 2                    | 3              | 4.4          | 772    | phosphatase, DNA binding, Human MRE11 protein like     |
| DNA                 | Y53C10A.12     | Y53C10A.12                                             | <i>hsf-1</i>     | I   | 1          | 2                    | 2              | 6.3          | 671    | HSF-type DNA binding domain                            |
| DNA                 | T22D1.10       | T22D1.10                                               | <i>ruvb-2</i>    | IV  | 1          | 2                    | 2              | 10.9         | 448    | RuvB recombination protein homolog                     |
| DNA                 | T20F5.7        | T20F5.7                                                |                  | I   | 1          | 2                    | 2              | 11.2         | 294    | Zn finger                                              |
| DNA                 | H06O01.2       | H06O01.2                                               |                  | I   | 1          | 2                    | 2              | 2.3          | 1465   | chromodomain-helicase-DNA-binding protein              |
| DNA                 | F41H10.10      | F41H10.10                                              | <i>htp-1</i>     | IV  | 1          | 2                    | 2              | 3.1          | 350    | DNA binding HORMA                                      |
| DNA                 | F40F12.7       | F40F12.7                                               |                  | X   | 1          | 2                    | 2              | 9            | 199    | TAZ zinc finger                                        |
| DNA                 | D1081.8        | D1081.8                                                |                  | I   | 1          | 2                    | 2              | 5.7          | 755    | homeodomain, Myb DNA binding                           |
| RNA                 | C15H11.9       | C15H11.9                                               |                  | V   | 2          | 6                    | 14             | 30.6         | 333    | Ribosome biogenesis regulatory protein homolog.        |
| RNA                 | Y41D4B.5       | Y41D4B.5                                               |                  | IV  | 2          | 4                    | 12             | 18.5         | 65     | Ribosomal protein S28e                                 |
| RNA                 | C47B2.5        | C47B2.5                                                | <i>ief-5</i>     | I   | 2          | 5                    | 11             | 16.3         | 246    | Translation Initiation factor (EIF-6)                  |
| RNA                 | F37F2.2        | F37F2.2                                                |                  | I   | 2          | 3                    | 9              | 16.5         | 254    | SRP, RNA binding                                       |
| RNA                 | C44B7.2        | C44B7.2                                                |                  | II  | 2          | 3                    | 11             | 13.9         | 577    | RNA binding                                            |
| RNA                 | F10G7.1        | F10G7.1                                                |                  | II  | 2          | 8                    | 10             | 12.1         | 785    | RNA processing, ribosome biosynthesis                  |
| RNA                 | T23H2.3        | T23H2.3                                                |                  | I   | 2          | 6                    | 7              | 10.5         | 1009   | helicase, RNA polymerase termination factor, SNF2      |
| RNA                 | Y54E10A.9      | Y54E10A.9                                              | <i>vbh-1</i>     | I   | 2          | 7                    | 10             | 13.7         | 641    | DEAD and DEAH box helicases                            |
| RNA                 | Y73B3A.18      | Y73B3A.18                                              |                  | X   | 2          | 6                    | 9              | 11.1         | 234    | Ribosomal protein L7A                                  |
| RNA                 | T04A8.6        | T04A8.6                                                |                  | III | 2          | 4                    | 9              | 17.6         | 307    | RNA recognition motif                                  |
| RNA                 | Y65B4A.6       | Y65B4A.6                                               |                  | I   | 2          | 5                    | 7              | 12.8         | 508    | DEAD/DEAH box helicase                                 |
| RNA                 | F33D11.10      | F33D11.10                                              |                  | I   | 2          | 5                    | 7              | 16.3         | 399    | DEAD/DEAH box helicase                                 |
| RNA                 | Y39A1A.14      | Y39A1A.14                                              |                  | III | 2          | 3                    | 7              | 23.8         | 231    | Suppressor Mra1 (ribosome biogenesis)                  |
| RNA                 | C24H12.4       | C24H12.4                                               |                  | II  | 2          | 2                    | 6              | 3.9          | 634    | helicase DDX25 testes expression                       |
| RNA                 | W02D3.11       | W02D3.11                                               |                  | I   | 2          | 4                    | 5              | 9.1          | 549    | RNA recognition motif                                  |
| RNA                 | ZK1290.6       | ZK1290.6                                               |                  | II  | 2          | 3                    | 5              | 8.2          | 477    | RNAse H                                                |
| RNA                 | Y46G5A.13      | Y46G5A.13                                              |                  | II  | 2          | 2                    | 5              | 10.4         | 434    | RNA rec motif                                          |
| RNA                 | F28C6.3        | F28C6.3                                                | <i>cpl-1</i>     | II  | 2          | 4                    | 4              | 4.9          | 430    | cleavage and polyadenylation factor                    |
| RNA                 | F55F8.3        | F55F8.3                                                |                  | I   | 2          | 4                    | 5              | 8            | 910    | WD40-repeat subunit of 18S rRNA processing complex     |
| RNA                 | C47E12.7       | C47E12.7                                               |                  | IV  | 2          | 3                    | 4              | 12.1         | 397    | Yeast YD78, similarity to human NNP-1/NOP52            |
| RNA                 | Y66H1A.4       | Y66H1A.4                                               |                  | IV  | 1          | 5                    | 25             | 31.9         | 276    | nucleolar protein required for pre-rRNA splicing       |
| RNA                 | F53F4.11       | F53F4.11                                               |                  | V   | 1          | 6                    | 10             | 16.9         | 543    | ribosomal protein                                      |
| RNA                 | R11D1.8        | R11D1.8                                                | <i>rpl-28</i>    | V   | 1          | 3                    | 9              | 7.9          | 126    | ribosomal protein L28 l                                |
| RNA                 | C25A1.6        | C25A1.6                                                |                  | I   | 1          | 3                    | 9              | 25           | 64     | Nucleolar RNA-binding protein, Nop10p family           |
| RNA                 | F58A4.5        | F58A4.5                                                |                  | III | 1          | 5                    | 8              | 6            | 1222   | Reverse transcriptase                                  |
| RNA                 | Y94H6A.5       | Y94H6A.5                                               |                  | IV  | 1          | 4                    | 8              | 3.9          | 853    | DEAD and DEAH box helicases                            |
| RNA                 | F32E10.4       | F32E10.4                                               | <i>ima-3</i>     | IV  | 1          | 3                    | 7              | 8.9          | 514    | serine-rich RNA polymerase I suppressor protein (SRP1) |
| RNA                 | C25A1.10       | C25A1.10                                               | <i>dao-5</i>     | I   | 1          | 3                    | 3              | 3.3          | 971    | SRP40, C-terminal domain                               |
| RNA                 | Y71G12B.8      | Y71G12B.8                                              |                  | I   | 1          | 5                    | 6              | 10.6         | 763    | DEAD box RNA helicase                                  |
| RNA                 | F55D10.2       | F55D10.2                                               | <i>rpl-25.1</i>  | X   | 1          | 4                    | 6              | 25.2         | 147    | Ribosomal protein L23                                  |
| RNA                 | W02B12.2       | W02B12.2                                               | <i>rsp-2</i>     | II  | 1          | 3                    | 6              | 12.5         | 281    | pre-mRNA splicing factor like protein                  |
| RNA                 | Y47G6A.10      | Y47G6A.10                                              |                  | I   | 1          | 4                    | 5              | 3.2          | 852    | ATPase, RNA binding                                    |
| RNA                 | R09B3.5        | R09B3.5                                                | <i>mag-1</i>     | I   | 1          | 4                    | 5              | 24.3         | 152    | MAGO NASHI PROTEIN                                     |
| RNA                 | K08E4.1        | K08E4.1                                                | <i>spt-5</i>     | I   | 1          | 4                    | 5              | 4.3          | 1208   | translation initiation protein SPT5 like               |
| RNA                 | C43E11.1       | C43E11.1                                               |                  | I   | 1          | 4                    | 5              | 13.1         | 580    | RNA recognition motif                                  |
| RNA                 | T13H5.5        | T13H5.5                                                |                  | II  | 1          | 3                    | 5              | 15.5         | 238    | ribosomal protein S18                                  |
| RNA                 | ZK512.2        | ZK512.2                                                |                  | III | 1          | 2                    | 5              | 4.5          | 578    | RNA helicase                                           |
| RNA                 | W04D2.6        | W04D2.6                                                |                  | V   | 1          | 2                    | 5              | 6            | 712    | RNA recognition motif. (aka RRM, RBD, or RNP domain)   |
| RNA                 | F59A2.3        | F59A2.3                                                |                  | III | 1          | 2                    | 5              | 11.9         | 236    | Splicing factor-associated                             |
| RNA                 | D1007.12       | D1007.12                                               | <i>rpl-24.1</i>  | I   | 1          | 2                    | 5              | 8.2          | 159    | 60S ribosomal protein L24                              |
| RNA                 | C03D6.8        | C03D6.8                                                | <i>rpl-24.2</i>  | I   | 1          | 2                    | 5              | 19.1         | 162    | ribosomal protein                                      |
| RNA                 | Y110A7A.18     | Y110A7A.18                                             |                  | I   | 1          | 4                    | 4              | 8.1          | 975    | Piwi/PAZ                                               |
| RNA                 | T23D8.4        | T23D8.4                                                | <i>eif-3.C</i>   | I   | 1          | 4                    | 4              | 7.1          | 898    | Translation initiation factor, proteasome component    |
| RNA                 | R05D11.4       | R05D11.4                                               |                  | V   | 1          | 4                    | 4              | 10           | 581    | ATP dependent RNA helicase                             |
| RNA                 | F55H2.6        | F55H2.6                                                | <i>clu-1</i>     | III | 1          | 4                    | 4              | 6.6          | 1247   | associated with eIF-3 and mitochondria                 |
| RNA                 | C37C3.2        | C37C3.2                                                |                  | V   | 1          | 4                    | 4              | 9.9          | 436    | eIF4-gamma/eIF5/eIF2-epsilon                           |
| RNA                 | Y92C3B.2       | Y92C3B.2                                               | <i>uaf-1</i>     | III | 1          | 3                    | 4              | 10.5         | 496    | Large subunit of splicing factor U2AF                  |
| RNA                 | Y51H7C.11      | Y51H7C.11                                              |                  | I   | 1          | 3                    | 4              | 5.5          | 1085   | nucleolar RNA-associated proteins (Nrap)               |
| RNA                 | F58A4.9        | F58A4.9                                                |                  | III | 1          | 3                    | 4              | 21.5         | 144    | RNA Pol I/III 16Kd polypeptide                         |
| RNA                 | C42C1.14       | C42C1.14                                               | <i>rpl-34</i>    | IV  | 1          | 3                    | 4              | 18.2         | 110    | large ribosomal subunit L34 protein                    |
| RNA                 | Y23H5B.6       | Y23H5B.6                                               |                  | I   | 1          | 2                    | 4              | 5.3          | 732    | DEAD box helicase                                      |
| RNA                 | Y116A8C.34     | Y116A8C.34                                             | <i>cyp-13</i>    | IV  | 1          | 2                    | 4              | 12.1         | 331    | RNA binding region                                     |
| RNA                 | T08A11.2       | T08A11.2                                               |                  | III | 1          | 2                    | 4              | 2.6          | 1322   | U2-snRNP associated splicing factor                    |
| RNA                 | Y53C12B.2      | Y53C12B.2                                              |                  | II  | 1          | 3                    | 3              | 14.1         | 277    | KH domain                                              |
| RNA                 | C05C8.2        | C05C8.2                                                |                  | V   | 1          | 3                    | 3              | 10.8         | 370    | KH domain                                              |
| RNA                 | ZK430.7        | ZK430.7                                                |                  | II  | 1          | 2                    | 3              | 5            | 444    | ribosomal processing protein                           |
| RNA                 | Y59A8B.6       | Y59A8B.6                                               |                  | V   | 1          | 2                    | 3              | 3.2          | 968    | RNA processing HAT                                     |
| RNA                 | H27M09.1       | H27M09.1                                               |                  | I   | 1          | 2                    | 3              | 6.5          | 630    | helicase                                               |
| RNA                 | F11C1.5        | F11C1.5                                                |                  | X   | 1          | 2                    | 3              | 1.8          | 1767   | Ribosomal protein L30, AAA ATPase, von Weillebrand     |
| RNA                 | C03D6.3        | C03D6.3                                                | <i>cel-1</i>     | I   | 1          | 2                    | 3              | 5            | 585    | mRNA capping enzyme                                    |
| RNA                 | Y37D8A.18      | Y37D8A.18                                              |                  | III | 1          | 2                    | 2              | 21.8         | 156    | Ribosomal protein S10                                  |
| RNA                 | W09D10.3       | W09D10.3                                               |                  | III | 1          | 2                    | 2              | 14.5         | 173    | ribosomal protein L7VL12 mitochondrial                 |
| RNA                 | T23B12.3       | T23B12.3                                               |                  | V   | 1          | 2                    | 2              | 17.8         | 264    | ribosomal protein                                      |
| RNA                 | F27C1.6        | F27C1.6                                                |                  | I   | 1          | 2                    | 2              | 5.7          | 647    | Utp14 protein-component of ribonucleoprotein complex   |
| RNA                 | F18H3.3        | F18H3.3                                                | <i>pab-2</i>     | X   | 1          | 2                    | 2              | 5.9          | 692    | Poly-adenylate binding protein, unique domain          |

Supplemental Table 2 Low abundance spermatogenic proteins copurified with chromatin (≤2 occurrences)

| Functional Category | Predicted Gene | Family ID<br>(when peptides identify more than 1 protein) | C. elegans locus | LG  | Abundance  |                      | Sequence Count | Coverage (%) | Length | Descriptor                                                 |
|---------------------|----------------|-----------------------------------------------------------|------------------|-----|------------|----------------------|----------------|--------------|--------|------------------------------------------------------------|
|                     |                |                                                           |                  |     | Occurrence | Total Spectrum Count |                |              |        |                                                            |
| RNA                 | C25A1.4        | C25A1.4                                                   |                  | I   | 1          | 2                    | 2              | 7.3          | 454    | RNA binding protein                                        |
| RNA                 | B0513.3        | B0513.3                                                   | <i>rpl-29</i>    | IV  | 1          | 2                    | 2              | 11.3         | 62     | 60S ribosomal protein L29                                  |
| Housekeeping        | F54D8.2        | F54D8.2                                                   |                  | III | 2          | 6                    | 14             | 34.4         | 128    | Cytochrome C oxidase                                       |
| Housekeeping        | R12C12.1       | R12C12.1                                                  |                  | II  | 2          | 9                    | 12             | 9.1          | 979    | Glycine dehydrogenase                                      |
| Housekeeping        | C29E4.8        | C29E4.8                                                   |                  | IV  | 2          | 6                    | 12             | 24.7         | 251    | Adenylate kinase                                           |
| Housekeeping        | K02F3.10       | K02F3.10                                                  |                  | III | 2          | 5                    | 12             | 44.8         | 201    | Aminoacyl-tRNA synthetase class I                          |
| Housekeeping        | C18E9.6        | C18E9.6                                                   |                  | II  | 2          | 10                   | 11             | 29.2         | 301    | mito porin                                                 |
| Housekeeping        | C09H10.3       | C09H10.3                                                  | <i>nuo-1</i>     | II  | 2          | 8                    | 11             | 30.1         | 479    | NADH-ubiquinone oxidoreductase                             |
| Housekeeping        | T20H4.5        | T20H4.5                                                   |                  | III | 2          | 3                    | 11             | 35.4         | 212    | Mitochondrial complex I 23K chain                          |
| Housekeeping        | K02D10.1       | K02D10.1                                                  |                  | III | 2          | 7                    | 9              | 15           | 526    | 4-NITROPHENYLPHOSPHATASE                                   |
| Housekeeping        | Y51H1A.3       | Y51H1A.3                                                  |                  | II  | 2          | 6                    | 9              | 32.7         | 199    | NADH-ubiquinone oxidoreductase ASH1 subunit                |
| Housekeeping        | T10B10.2       | T10B10.2                                                  |                  | X   | 2          | 6                    | 9              | 15.6         | 422    | ubiquinol-cytochrome c reductase complex core protein 2    |
| Housekeeping        | Y50D7A.7       | Y50D7A.7                                                  |                  | III | 2          | 5                    | 9              | 13.9         | 597    | FAD linked oxidase                                         |
| Housekeeping        | T22D1.3        | T22D1.3                                                   |                  | IV  | 2          | 7                    | 8              | 10.3         | 534    | inosine monophosphate dehydrogenase                        |
| Housekeeping        | C06E7.3        | C06E7.3                                                   |                  | IV  | 2          | 7                    | 8              | 31.7         | 404    | S-adenosylmethionine synthetase                            |
| Housekeeping        | C49F5.1        | C49F5.1                                                   |                  | X   | 2          | 5                    | 8              | 28.5         | 403    | s-adenosylmethionine synthetase                            |
| Housekeeping        | C02B10.1       | C02B10.1                                                  |                  | IV  | 2          | 4                    | 8              | 16.7         | 419    | acyl-CoA dehydrogenase                                     |
| Housekeeping        | Y57A10C.6      | Y57A10C.6                                                 |                  | II  | 2          | 3                    | 8              | 13.6         | 412    | 3-keto-acyl-CoA thiolase                                   |
| Housekeeping        | F54F2.8        | F54F2.8                                                   | <i>prx-19</i>    | III | 2          | 3                    | 8              | 27           | 282    | PEROXISOMAL FARNESYLATED PROTEIN                           |
| Housekeeping        | H06I04.3       | H06I04.3                                                  |                  | III | 2          | 7                    | 7              | 9.5          | 833    | FtsJ-like methyltransferase                                |
| Housekeeping        | T26A5.3        | T26A5.3                                                   |                  | III | 2          | 5                    | 7              | 16.9         | 474    | NADH-ubiquinone oxidoreductase                             |
| Housekeeping        | F56B3.5        | F56B3.5                                                   |                  | IV  | 2          | 5                    | 7              | 11.6         | 284    | enoyl-CoA hydratase                                        |
| Housekeeping        | C28D4.3        | C28D4.3                                                   | <i>gln-6</i>     | III | 2          | 5                    | 7              | 14.7         | 368    | glutamine synthase                                         |
| Housekeeping        | Y105C5B.12     | Y105C5B.12                                                |                  | IV  | 2          | 5                    | 6              | 25.4         | 351    | S-adenosylmethionine synthetase                            |
| Housekeeping        | ZK669.4        | ZK669.4                                                   |                  | II  | 2          | 3                    | 6              | 10.9         | 448    | lipoamide acyltransferase                                  |
| Housekeeping        | W10D9.5        | W10D9.5                                                   |                  | II  | 2          | 3                    | 6              | 41.3         | 109    | mito?                                                      |
| Housekeeping        | F57C2.5        | F57C2.5                                                   |                  | II  | 2          | 3                    | 6              | 15           | 387    | strictosidine synthase                                     |
| Housekeeping        | B0464.1        | B0464.1                                                   | <i>drs-1</i>     | III | 2          | 4                    | 5              | 8.5          | 531    | drs-1 Aspartyl-tRNA synthetase                             |
| Housekeeping        | F25B4.1        | F25B4.1                                                   |                  | V   | 2          | 3                    | 5              | 7.7          | 402    | aminomethyltransferase                                     |
| Housekeeping        | F08C6.6        | F08C6.6                                                   |                  | X   | 2          | 4                    | 4              | 16.1         | 355    | apyrase                                                    |
| Housekeeping        | D1005.1        | D1005.1                                                   |                  | X   | 2          | 4                    | 4              | 6.2          | 1106   | ATP citrate lyase                                          |
| Housekeeping        | C06E7.1        | C06E7.1                                                   |                  | IV  | 2          | 4                    | 4              | 40.4         | 404    | S-adenosylmethionine synthetase                            |
| Housekeeping        | C16A3.5        | C16A3.5                                                   |                  | III | 1          | 8                    | 19             | 48.5         | 163    | NADH-ubiquinone oxidoreductase B22                         |
| Housekeeping        | W09C5.8        | W09C5.8                                                   |                  | I   | 1          | 10                   | 18             | 36.6         | 175    | cytochrome C oxidase                                       |
| Housekeeping        | F45H10.3       | F45H10.3                                                  |                  | II  | 1          | 7                    | 14             | 32.7         | 168    | NADH-ubiquinone oxidoreductase subunit                     |
| Housekeeping        | F59C6.5        | F59C6.5                                                   |                  | I   | 1          | 7                    | 8              | 28.8         | 260    | NADH ubiquinone oxidoreductase                             |
| Housekeeping        | Y54F10AM.5     | Y54F10AM.5                                                |                  | III | 1          | 5                    | 8              | 33.2         | 205    | CHCH                                                       |
| Housekeeping        | Y56A3A.32      | Y56A3A.32                                                 | <i>wah-1</i>     | III | 1          | 6                    | 7              | 10.6         | 643    | FAD-dependent pyridine                                     |
| Housekeeping        | F55A12.8       | F55A12.8                                                  |                  | I   | 1          | 6                    | 7              | 9.1          | 1043   | ATPase, GNC-5 related N-acetyltransferase                  |
| Housekeeping        | F26D10.10      | F26D10.10                                                 |                  | IV  | 1          | 5                    | 7              | 15.7         | 369    | Carbamoyl-phosphate synthase                               |
| Housekeeping        | Y110A7A.12     | Y110A7A.12                                                |                  | I   | 1          | 4                    | 7              | 11.8         | 501    | ATP synthase                                               |
| Housekeeping        | C31E10.7       | C31E10.7                                                  |                  | X   | 1          | 3                    | 7              | 31.2         | 138    | cytochrome b5                                              |
| Housekeeping        | C56G2.6        | C56G2.6                                                   | <i>let-767</i>   | III | 1          | 2                    | 7              | 10.4         | 316    | Alcohol/other dehydrogenases, short chain type)            |
| Housekeeping        | ZK973.10       | ZK973.10                                                  | <i>lpd-5</i>     | I   | 1          | 5                    | 6              | 35.2         | 199    | ETC complex                                                |
| Housekeeping        | F28F8.2        | F28F8.2                                                   |                  | V   | 1          | 5                    | 6              | 17.2         | 618    | long-chain-fatty-acid-CoA ligase                           |
| Housekeeping        | Y57G11C.12     | Y57G11C.12                                                |                  | IV  | 1          | 4                    | 6              | 29.8         | 131    | NADH-ubiquinone oxidoreductase                             |
| Housekeeping        | R03H10.4       | R03H10.4                                                  |                  | II  | 1          | 4                    | 6              | 21.1         | 147    | cytochrome                                                 |
| Housekeeping        | K12G11.3       | K12G11.3                                                  |                  | V   | 1          | 4                    | 6              | 21.8         | 349    | alcohol dehydrogenase                                      |
| Housekeeping        | F08A8.1        | F08A8.1                                                   |                  | I   | 1          | 4                    | 6              | 10.2         | 674    | ACYL-COENZYME A OXIDASE, PEROXISOMAL                       |
| Housekeeping        | F53F4.10       | F53F4.10                                                  |                  | V   | 1          | 3                    | 6              | 10.9         | 239    | NADH-ubiquinone dehydrogenase 24 KD subunit                |
| Housekeeping        | F53C11.3       | F53C11.3                                                  |                  | V   | 1          | 3                    | 6              | 17.9         | 313    | 2,4-dienoyl-CoA reductase                                  |
| Housekeeping        | F22D6.4        | F22D6.4                                                   |                  | I   | 1          | 3                    | 6              | 40           | 140    | NADH_ubiquinone oxidoreductase subunit                     |
| Housekeeping        | F14H8.1        | F14H8.1                                                   |                  | V   | 1          | 3                    | 6              | 8.9          | 471    | oxysterol-binding protein                                  |
| Housekeeping        | T27E9.2        | T27E9.2                                                   |                  | III | 1          | 2                    | 6              | 45.3         | 75     | ubiquinol-cytochrome c reductase complex                   |
| Housekeeping        | K10H10.2       | K10H10.2                                                  |                  | II  | 1          | 2                    | 6              | 14.5         | 337    | beta-synthase                                              |
| Housekeeping        | F02A9.4        | F02A9.4                                                   |                  | II  | 1          | 5                    | 5              | 20.4         | 608    | Hydratase-dehydrogenase-epimerase                          |
| Housekeeping        | R04F11.2       | R04F11.2                                                  |                  | II  | 1          | 4                    | 5              | 31.8         | 107    | ATP synthase E                                             |
| Housekeeping        | F37C12.7       | F37C12.7                                                  |                  | III | 1          | 4                    | 5              | 7.5          | 731    | AMP-dependent synthetase and ligase                        |
| Housekeeping        | B0272.4        | B0272.4                                                   |                  | X   | 1          | 4                    | 5              | 9            | 255    | enoyl-CoA hydratase/isomerase                              |
| Housekeeping        | T26C5.1        | T26C5.1                                                   |                  | II  | 1          | 3                    | 5              | 11.1         | 208    | glutathione S-transferase                                  |
| Housekeeping        | F55A11.6       | F55A11.6                                                  |                  | V   | 1          | 2                    | 5              | 4.9          | 629    | Glutathione S-transferase                                  |
| Housekeeping        | F02E8.1        | F02E8.1                                                   | <i>asb-2</i>     | X   | 1          | 4                    | 4              | 14.4         | 305    | ATP synthase B chain homeodomain like                      |
| Housekeeping        | C16A3.10       | C16A3.10                                                  |                  | III | 1          | 4                    | 4              | 4.3          | 422    | Aminotransferases class-III pyridoxal-phosphate            |
| Housekeeping        | Y94H6A.8       | Y94H6A.8                                                  |                  | IV  | 1          | 3                    | 4              | 12.8         | 187    | NADH:ubiquinone oxidoreductase 17.2 kD subunit             |
| Housekeeping        | T08B2.9        | T08B2.9                                                   | <i>frs-1</i>     | I   | 1          | 3                    | 4              | 12.9         | 552    | phenylalanyl-tRNA synthetase                               |
| Housekeeping        | T05H4.13       | T05H4.13                                                  |                  | II  | 1          | 3                    | 4              | 10.5         | 493    | aldehyde dehydrogenase                                     |
| Housekeeping        | D2030.5        | D2030.5                                                   |                  | I   | 1          | 3                    | 4              | 28.4         | 162    | Glyoxalase/Bleomycin resistance/Dioxygenase superfamily    |
| Housekeeping        | D2030.4        | D2030.4                                                   |                  | I   | 1          | 3                    | 4              | 31.7         | 123    | NADH:CoQ oxidoreductase subunit B18                        |
| Housekeeping        | F37C12.3       | F37C12.3                                                  |                  | III | 1          | 2                    | 4              | 17.9         | 156    | acyl carrier                                               |
| Housekeeping        | Y56A3A.19      | Y56A3A.19                                                 |                  | III | 1          | 3                    | 3              | 24.8         | 133    | acyl-carrier protein , fatty acid synthase                 |
| Housekeeping        | W01C9.4        | W01C9.4                                                   |                  | II  | 1          | 3                    | 3              | 11.3         | 309    | 2,4-dienoyl-CoA reductase                                  |
| Housekeeping        | M03A8.1        | M03A8.1                                                   | <i>dhs-28</i>    | X   | 1          | 3                    | 3              | 15.4         | 436    | alcohol dehydrogenase; non-specific lipid transfer protein |
| Housekeeping        | K02B2.1        | K02B2.1                                                   |                  | IV  | 1          | 3                    | 3              | 10.7         | 457    | 6-phosphofructo-2-kinase                                   |
| Housekeeping        | H32C10.1       | H32C10.1                                                  |                  | IV  | 1          | 3                    | 3              | 12.8         | 405    | hydrolase                                                  |
| Housekeeping        | F23H12.2       | F23H12.2                                                  |                  | V   | 1          | 3                    | 3              | 16.5         | 188    | mitochondrial precursor receptor                           |
| Housekeeping        | F02E9.3        | F02E9.3                                                   |                  | I   | 1          | 3                    | 3              | 11.1         | 289    | ubiquitin carboxyl-terminal hydrolase                      |
| Housekeeping        | E04F6.3        | E04F6.3                                                   |                  | II  | 1          | 3                    | 3              | 16.1         | 298    | Hydratase-dehydrogenase-epimerase                          |
| Housekeeping        | C37A2.3        | C37A2.3                                                   |                  | I   | 1          | 3                    | 3              | 6.1          | 442    | acyl-CoA dehydrogenase                                     |
| Housekeeping        | C25H3.7        | C25H3.7                                                   |                  | II  | 1          | 3                    | 3              | 23.4         | 175    | Glutathione S-transferases                                 |
| Housekeeping        | Y63D3A.7       | Y63D3A.7                                                  |                  | I   | 1          | 2                    | 3              | 18.8         | 117    | mito ribosome                                              |
| Housekeeping        | Y53F4B.39      | Y53F4B.39                                                 |                  | II  | 1          | 2                    | 3              | 16.3         | 295    | beta lactamase                                             |
| Housekeeping        | Y18H1A.8       | Y18H1A.8                                                  |                  | I   | 1          | 2                    | 3              | 23.8         | 151    | pectinesterase                                             |
| Housekeeping        | T28B4.3        | T28B4.3                                                   |                  | X   | 1          | 2                    | 3              | 31.9         | 141    | Transthyretin-like                                         |
| Housekeeping        | T25G3.4        | T25G3.4                                                   |                  | I   | 1          | 2                    | 3              | 6.4          | 722    | mitochondrial glycerol-3-phosphate dehydrogenase           |
| Housekeeping        | T09A5.11       | T09A5.11                                                  |                  | I   | 1          | 2                    | 3              | 10.1         | 445    | N-oligosaccharyl transferase 48kd subunit                  |
| Housekeeping        | T05H4.5        | T05H4.5                                                   |                  | V   | 1          | 2                    | 3              | 14.2         | 309    | NADH-cytochrome B5 reductase                               |
| Housekeeping        | K02A4.1        | K02A4.1                                                   | <i>eca-39</i>    | X   | 1          | 2                    | 3              | 13.5         | 415    | tw1 like protein                                           |
| Housekeeping        | F46E10.10      | F46E10.10                                                 |                  | V   | 1          | 2                    | 3              | 6.8          | 336    | lactate dehydrogenase                                      |
| Housekeeping        | F40G9.5        | F40G9.5                                                   |                  | III | 1          | 2                    | 3              | 5.3          | 488    | cytochrom P450                                             |
| Housekeeping        | F35G2.4        | F35G2.4                                                   | <i>phy-2</i>     | IV  | 1          | 2                    | 3              | 9.6          | 539    | prolyl 4-hydroxylase alpha subunit                         |
| Housekeeping        | ZK836.2        | ZK836.2                                                   |                  | V   | 1          | 2                    | 2              | 4            | 906    | 2-oxoglutarate dehydrogenase                               |
| Housekeeping        | ZK550.6        | ZK550.6                                                   |                  | IV  | 1          | 2                    | 2              | 8            | 312    | phytanoyl-CoA dioxygenase                                  |
| Housekeeping        | ZK54.2         | ZK54.2                                                    | <i>tps-1</i>     | X   | 1          | 2                    | 2              | 1.5          | 1294   | trehalose phosphate synthase                               |
| Housekeeping        | Y45F3A.3       | Y45F3A.3                                                  |                  | III | 1          | 2                    | 2              | 6.8          | 617    | Acyl-CoA dehydrogenase                                     |

Supplemental Table 2 Low abundance spermatogenic proteins copurified with chromatin (≤2 occurrences)

| Functional Category  | Predicted Gene | Family ID<br>(when peptides identify more than 1 protein) | C. elegans locus | LG  | Abundance  |                      | Sequence Count | Coverage (%) | Length | Descriptor                                                   |
|----------------------|----------------|-----------------------------------------------------------|------------------|-----|------------|----------------------|----------------|--------------|--------|--------------------------------------------------------------|
|                      |                |                                                           |                  |     | Occurrence | Total Spectrum Count |                |              |        |                                                              |
| Housekeeping         | Y23H5A.7       | Y23H5A.7                                                  | <i>crs-1</i>     | I   | 1          | 2                    | 2              | 3.4          | 909    | aminoacyl-tRNA synthetase                                    |
| Housekeeping         | K07E3.4        | K07E3.4                                                   |                  | X   | 1          | 2                    | 2              | 7.8          | 640    | tetrahydrofolate synthase                                    |
| Housekeeping         | F53F8.5        | F53F8.5                                                   |                  | V   | 1          | 2                    | 2              | 9.8          | 368    | SAM                                                          |
| Housekeeping         | F09F7.4        | F09F7.4                                                   |                  | III | 1          | 2                    | 2              | 10.6         | 386    | Enoyl-CoA hydratase                                          |
| Housekeeping         | C25H3.9        | C25H3.9                                                   |                  | II  | 1          | 2                    | 2              | 17.8         | 180    | NADH dehydrogenase                                           |
| Housekeeping         | C15H11.4       | C15H11.4                                                  | <i>dhs-22</i>    | V   | 1          | 2                    | 2              | 6.3          | 333    | dehydrogenase                                                |
| Cytoskeletal         | T06G6.9        | T06G6.9                                                   | <i>vbp-1</i>     | I   | 1          | 2                    | 2              | 27           | 185    | Human VHL binding protein like                               |
| Cytoskeletal         | T02C12.1       | T02C12.1                                                  |                  | III | 1          | 2                    | 2              | 3            | 1017   | hum-5 myosin IA                                              |
| Signalling           | F37E3.3        | F37E3.3                                                   |                  | I   | 2          | 6                    | 12             | 24.1         | 419    | Protein kinase                                               |
| Signalling           | F36H12.10      | F36H12.10/R13H9.6                                         |                  | IV  | 2          | 5                    | 12             | 20.9         | 398    | Protein-tyrosine-phosphatase                                 |
| Signalling           | R13H9.6        | F36H12.10/R13H9.6                                         |                  | IV  | 2          | 3                    | 7              | 14.5         | 380    | Protein kinase                                               |
| Signalling           | C02B10.6       | C02B10.6                                                  |                  | IV  | 2          | 5                    | 12             | 20.9         | 398    | Protein tyrosine phosphatase                                 |
| Signalling           | F55F8.5        | F55F8.5                                                   |                  | I   | 2          | 4                    | 10             | 14.6         | 439    | WD domain, G-beta repeats                                    |
| Signalling           | F49D11.9       | F49D11.9                                                  |                  | I   | 2          | 5                    | 9              | 7.4          | 1017   | WD domain, G-beta repeats                                    |
| Signalling           | C55B7.3        | C55B7.3                                                   |                  | IV  | 2          | 6                    | 8              | 15.3         | 346    | Protein-tyrosine-phosphatase                                 |
| Signalling           | F35C11.2       | F35C11.2                                                  |                  | II  | 2          | 6                    | 7              | 18.9         | 397    | Protein-tyrosine-phosphatase                                 |
| Signalling           | Y23H5B.5       | Y23H5B.5                                                  |                  | I   | 2          | 5                    | 7              | 16.3         | 547    | G-protein beta WD-40 repeat                                  |
| Signalling           | F36H12.9       | F36H12.9                                                  |                  | IV  | 2          | 3                    | 7              | 14.5         | 380    | Protein kinase                                               |
| Signalling           | Y66D12A.20     | Y66D12A.20                                                | <i>spe-6</i>     | III | 2          | 5                    | 6              | 15           | 379    | protein kinase required for sperm meiosis and spermiogenesis |
| Signalling           | T01G9.6        | T01G9.6                                                   | <i>kin-10</i>    | I   | 2          | 5                    | 6              | 26.5         | 234    | kin-10 KIN-10 casein kinase                                  |
| Signalling           | C55C3.4        | C55C3.4/F10G8.1                                           |                  | IV  | 2          | 4                    | 6              | 14.8         | 431    | Tyrosine-protein kinase                                      |
| Signalling           | F10G8.1        | C55C3.4/F10G8.1                                           |                  | I   | 2          | 6                    | 8              | 15.1         | 352    | Tyrosine-protein kinase                                      |
| Signalling           | F38H4.4        | F38H4.4                                                   |                  | IV  | 2          | 4                    | 6              | 4            | 501    | Tyrosine-protein kinase                                      |
| Signalling           | C35E7.10       | C35E7.10                                                  |                  | I   | 2          | 4                    | 6              | 14.9         | 430    | Protein kinase                                               |
| Signalling           | H05L14.1       | H05L14.1                                                  |                  | I   | 2          | 4                    | 5              | 9.9          | 794    | casein kinase                                                |
| Signalling           | ZK973.3        | ZK973.3                                                   |                  | I   | 2          | 3                    | 5              | 13.7         | 451    | Protein phosphatase                                          |
| Signalling           | C08C3.4        | C08C3.4                                                   |                  | III | 2          | 3                    | 5              | 17.9         | 262    | BTB/POZ domain                                               |
| Signalling           | F25D1.1        | F25D1.1                                                   |                  | V   | 2          | 3                    | 5              | 7.7          | 468    | Protein phosphatase                                          |
| Signalling           | M05D6.3        | M05D6.3                                                   |                  | II  | 2          | 4                    | 4              | 13.9         | 397    | Protein-tyrosine-phosphatase                                 |
| Signalling           | B0280.9        | B0280.9                                                   |                  | III | 1          | 5                    | 9              | 12.8         | 429    | WD domain, G-beta repeats                                    |
| Signalling           | W01B6.2        | W01B6.2                                                   |                  | IV  | 1          | 5                    | 7              | 12.8         | 366    | Serine/threonine kinase                                      |
| Signalling           | K01C8.9        | K01C8.9                                                   |                  | II  | 1          | 5                    | 7              | 8.5          | 556    | GTP-binding protein                                          |
| Signalling           | T19A6.2        | T19A6.2                                                   | <i>ngp-1</i>     | I   | 1          | 4                    | 7              | 9.7          | 698    | Nuclear/nucleolar GTP-binding Protein                        |
| Signalling           | Y51H4A.3       | Y51H4A.3                                                  |                  | I   | 1          | 2                    | 7              | 17.7         | 192    | Ras GTPase                                                   |
| Signalling           | T05A7.6        | T05A7.6                                                   |                  | II  | 1          | 5                    | 6              | 9.6          | 758    | casein kinase                                                |
| Signalling           | Y53C12B.1      | Y53C12B.1                                                 |                  | II  | 1          | 5                    | 5              | 13.5         | 793    | WD domain, G-beta repeats (4 domains)                        |
| Signalling           | ZK622.1        | ZK622.1                                                   |                  | II  | 1          | 3                    | 5              | 8.8          | 419    | Tyrosine-protein kinase                                      |
| Signalling           | F09C12.2       | F09C12.2                                                  |                  | II  | 1          | 2                    | 5              | 4.5          | 691    | Ser/Thr protein kinase                                       |
| Signalling           | R155.2         | R155.2                                                    |                  | III | 1          | 4                    | 4              | 5.3          | 1308   | Protein-tyrosine-phosphatase                                 |
| Signalling           | F47B3.6        | F47B3.1/F47B3.6                                           |                  | I   | 1          | 4                    | 4              | 13.7         | 364    | Protein-tyrosine phosphatase                                 |
| Signalling           | F47B3.1        | F47B3.1/F47B3.6                                           |                  | I   | 1          | 4                    | 4              | 13.8         | 363    | Protein-tyrosine-phosphatase                                 |
| Signalling           | R11E3.1        | R11E3.1                                                   |                  | IV  | 1          | 2                    | 4              | 6.8          | 545    | Protein kinase                                               |
| Signalling           | C10H11.9       | C10H11.9                                                  | <i>let-502</i>   | I   | 1          | 2                    | 4              | 3            | 1173   | let-502 Rho-associated kinase                                |
| Signalling           | C08F8.6        | C08F8.6                                                   |                  | IV  | 1          | 2                    | 4              | 10.3         | 380    | Serine/threonine kinase                                      |
| Signalling           | F13H8.2        | F13H8.2                                                   |                  | II  | 1          | 3                    | 3              | 2.2          | 929    | Dip2/Utp12 Family; WD domain, G-beta repeat                  |
| Signalling           | C06A1.3        | C06A1.3                                                   |                  | II  | 1          | 3                    | 3              | 8.5          | 364    | Serine/threonine protein phosphatase                         |
| Signalling           | F58G1.3        | F58G1.3                                                   |                  | I   | 1          | 3                    | 3              | 9.1          | 341    | Protein phosphatase-1 (PP1) (2 domains)                      |
| Signalling           | Y18H1A.1       | Y18H1A.1                                                  |                  | I   | 1          | 2                    | 3              | 4.2          | 425    | tyr specific protein                                         |
| Signalling           | R07E4.6        | R07E4.6                                                   | <i>kin-2</i>     | X   | 1          | 2                    | 3              | 6.9          | 376    | Cyclic nucleotide-binding domain                             |
| Signalling           | K11E8.1        | K11E8.1                                                   | <i>unc-43</i>    | IV  | 1          | 2                    | 3              | 4.5          | 559    | Ca/Calmodulin-dependent Kinase                               |
| Signalling           | W03F11.4       | W03F11.4                                                  |                  | I   | 1          | 2                    | 2              | 1.9          | 1406   | protein-tyrosine phosphatase                                 |
| Signalling           | Y45F10D.7      | Y45F10D.7                                                 |                  | IV  | 1          | 2                    | 2              | 2.8          | 897    | G-protein WD40 repeat                                        |
| Signalling           | C04C11.2       | C04C11.2                                                  |                  | X   | 1          | 2                    | 2              | 6            | 584    | Arrestin (or S-antigen)                                      |
| Signalling           | C01F6.6        | C01F6.6                                                   |                  | IV  | 1          | 2                    | 2              | 4.9          | 597    | PDZ domain (Also known as DHR or GLGF)                       |
| Signalling           | F36H1.3        | F36H1.3                                                   |                  | IV  | 1          | 2                    | 2              | 4.4          | 597    | Protein-tyrosine-phosphatase                                 |
| Signalling           | C43E11.5       | C43E11.5/C50F2.5                                          |                  | I   | 1          | 2                    | 2              | 7.9          | 368    | Protein-tyrosine-phosphatase                                 |
| Signalling           | C50F2.5        | C43E11.5/C50F2.5                                          |                  | I   | 1          | 2                    | 2              | 7.9          | 368    | Protein-tyrosine-phosphatase                                 |
| Major Sperm          | F42A9.7        | F42A9.7                                                   |                  | IV  | 2          | 8                    | 13             | 21           | 267    | Major Sperm Protein Domain                                   |
| Major Sperm          | ZK354.7        | ZK354.7                                                   |                  | IV  | 1          | 3                    | 4              | 9.8          | 224    | Major Sperm Protein Domain                                   |
| Major Sperm          | T13F2.11       | msp                                                       | <i>msp-78</i>    | IV  | 1          | 2                    | 3              | 22           | 127    | Major Sperm Protein Domain                                   |
| Major Sperm          | F26G1.7        | msp                                                       | <i>msp-3</i>     | II  | 1          | 2                    | 3              | 22           | 127    | Major Sperm Protein Domain                                   |
| Major Sperm          | W03F11.3       | W03F11.3                                                  |                  | I   | 1          | 2                    | 2              | 22.4         | 183    | Major Sperm Protein Domain                                   |
| Major Sperm          | F36H12.3       | F36H12.3                                                  |                  | IV  | 1          | 2                    | 2              | 5.7          | 335    | Major Sperm Protein Domain                                   |
| Extracellular Matrix | W01A11.4       | W01A11.4                                                  | <i>lec-10</i>    | V   | 2          | 10                   | 26             | 61.5         | 192    | lec-10 galactin (S-lectin)                                   |
| Extracellular Matrix | W09G10.6       | W09G10.6                                                  |                  | II  | 2          | 11                   | 19             | 20           | 621    | C type Lectin                                                |
| Extracellular Matrix | F02E11.5       | F02E11.5                                                  |                  | II  | 2          | 5                    | 14             | 27.1         | 207    | SCP-like extracellular Proteins                              |
| Extracellular Matrix | Y46C8AL.1      | Y46C8AL.1                                                 |                  | IV  | 2          | 5                    | 5              | 14.6         | 577    | Lectin                                                       |
| Extracellular Matrix | F47C12.4       | F47C12.4                                                  |                  | IV  | 2          | 5                    | 5              | 12.3         | 575    | C-type Lectin                                                |
| Extracellular Matrix | F54D1.6        | F54D1.6                                                   |                  | IV  | 2          | 3                    | 5              | 4            | 1447   | AMOP domain (adhesion)                                       |
| Extracellular Matrix | W02D7.10       | W02D7.10                                                  |                  | V   | 1          | 5                    | 8              | 10.7         | 243    | lectin                                                       |
| Extracellular Matrix | R07B1.10       | R07B1.10                                                  | <i>lec-8</i>     | X   | 1          | 4                    | 7              | 26.7         | 180    | galactin domain                                              |
| Extracellular Matrix | F21H7.4        | F21H7.4                                                   |                  | V   | 1          | 3                    | 5              | 22.7         | 282    | lectin                                                       |
| Extracellular Matrix | K07E12.1       | K07E12.1                                                  |                  | III | 1          | 3                    | 4              | 0.4          | 13055  | Fibronectin, Ig, EGF, Sushi, von Willebrand                  |
| Extracellular Matrix | Y25C1A.1       | Y25C1A.1                                                  |                  | II  | 1          | 2                    | 2              | 8.8          | 578    | lectin                                                       |
| Extracellular Matrix | F46A8.8        | F46A8.8                                                   |                  | I   | 1          | 2                    | 2              | 5.7          | 298    | galectin                                                     |
| Extracellular Matrix | F14B8.5        | F14B8.5                                                   |                  | X   | 1          | 2                    | 2              | 9.2          | 535    | Legume lectin, beta domain                                   |
| Heat Shock           | T10B5.5        | T10B5.5                                                   |                  | V   | 2          | 6                    | 8              | 16.6         | 535    | chaperone                                                    |
| Heat Shock           | C55B6.2        | C55B6.2                                                   | <i>dnj-7</i>     | X   | 1          | 4                    | 6              | 15.5         | 491    | heat shock protein                                           |
| Heat Shock           | F22B7.5        | F22B7.5                                                   | <i>dnj-10</i>    | III | 1          | 3                    | 4              | 12.5         | 456    | heat shock                                                   |
| Heat Shock           | T24H10.3       | T24H10.3                                                  | <i>dnj-23</i>    | II  | 1          | 2                    | 2              | 20.2         | 242    | DNAJ protein                                                 |
| Heat Shock           | Y63D3A.6       | Y63D3A.6                                                  | <i>dnj-29</i>    | I   | 1          |                      |                |              | 579    | prokaryotic heat shock protein                               |
| Nuclear Envelope     | Y77E11A.13     | Y77E11A.13                                                | <i>npp-20</i>    | IV  | 2          | 3                    | 7              | 17.3         | 313    | WD protein                                                   |
| Nuclear Envelope     | F07A11.3       | F07A11.3                                                  | <i>npp-5</i>     | II  | 2          | 4                    | 5              | 9.7          | 813    | Nuclear Pore complex Protein                                 |
| Nuclear Envelope     | Y41D4B.19      | Y41D4B.19                                                 |                  | IV  | 2          | 2                    | 4              | 9            | 411    | npp-8 nucleoporin                                            |
| Nuclear Envelope     | M01D7.6        | M01D7.6                                                   | <i>emr-1</i>     | I   | 2          | 3                    | 5              | 17.5         | 166    | emerin (nuclear membrane protein)                            |
| Nuclear Envelope     | F53F10.5       | F53F10.5                                                  |                  | I   | 1          | 6                    | 10             | 9.1          | 805    | Nuclear Pore complex Protein gene class                      |
| Nuclear Envelope     | Y43F4B.4       | Y43F4B.4                                                  | <i>npp-18</i>    | III | 1          | 3                    | 4              | 14.9         | 363    | WD domain, G-beta repeat (2 domains)                         |
| Nuclear Envelope     | C03D6.4        | C03D6.4                                                   | <i>npp-14</i>    | I   | 1          | 2                    | 2              | 2.9          | 1390   | nucleoporin                                                  |

Supplemental Table 2 Low abundance spermatogenic proteins copurified with chromatin (≤2 occurrences)

| Functional Category | Predicted Gene | Family ID<br>(when peptides identify more than 1 protein) | C. elegans locus | LG  | Abundance  |                      | Sequence Count | Coverage (%) | Length | Descriptor                                                  |
|---------------------|----------------|-----------------------------------------------------------|------------------|-----|------------|----------------------|----------------|--------------|--------|-------------------------------------------------------------|
|                     |                |                                                           |                  |     | Occurrence | Total Spectrum Count |                |              |        |                                                             |
| Other               | ZC250.1        | ZC250.1                                                   | <i>cyp-17</i>    | V   | 2          | 4                    | 22             | 9.5          | 517    | cyclophilin (protein folding)                               |
| Other               | F45G2.4        | F45G2.4                                                   |                  | III | 2          | 7                    | 19             | 32.5         | 292    | Coatomer                                                    |
| Other               | F20G2.4        | F20G2.4                                                   | <i>nas-24</i>    | V   | 2          | 5                    | 17             | 11.7         | 366    | zinc metalloprotease                                        |
| Other               | F21D5.7        | F21D5.7                                                   |                  | IV  | 2          | 4                    | 11             | 13.1         | 496    | signal recognition particle protein (SRP54)                 |
| Other               | C01G12.8       | C01G12.8                                                  |                  | II  | 2          | 7                    | 9              | 4.9          | 1049   | sodium/potassium transporting ATPase                        |
| Other               | CC4.3          | CC4.3                                                     | <i>smu-1</i>     | I   | 2          | 4                    | 9              | 15.1         | 510    | Suppressor of Mec and Unc defects                           |
| Other               | C28A5.3        | C28A5.3                                                   | <i>nex-3</i>     | III | 2          | 4                    | 6              | 22.1         | 317    | Annexin                                                     |
| Other               | T10D4.4        | T10D4.4                                                   | <i>ins-31</i>    | II  | 2          | 4                    | 5              | 17.4         | 218    | insulin-related peptide beta type family                    |
| Other               | C17E4.9        | C17E4.9                                                   |                  | I   | 2          | 4                    | 5              | 20.9         | 320    | Sodium/potassium transporting ATPase beta chain             |
| Other               | F40E10.3       | F40E10.3                                                  | <i>csq-1</i>     | X   | 2          | 3                    | 5              | 16.3         | 417    | Calsequestrin-principal calcium-binding protein             |
| Other               | T24H7.1        | T24H7.1                                                   | <i>phb-2</i>     | II  | 1          | 4                    | 10             | 15           | 286    | Prohibitin                                                  |
| Other               | B0495.7        | B0495.7                                                   |                  | II  | 1          | 3                    | 7              | 3.8          | 895    | Peptidase family M28                                        |
| Other               | F56A3.4        | F56A3.4                                                   | <i>spd-5</i>     | I   | 1          | 4                    | 6              | 7.4          | 1198   | pronuclear migration is defective                           |
| Other               | T14G10.5       | T14G10.5                                                  |                  | IV  | 1          | 3                    | 5              | 3.9          | 870    | gamma subunit of the coatomer (COP1) complex                |
| Other               | K08F11.3       | K08F11.3                                                  |                  | IV  | 1          | 3                    | 5              | 11.8         | 390    | Proteasome component region PCI                             |
| Other               | K08D12.3       | K08D12.3                                                  |                  | X   | 1          | 3                    | 5              | 13.2         | 151    | proteasome component                                        |
| Other               | C27D11.1       | C27D11.1                                                  | <i>egl-45</i>    | III | 1          | 4                    | 4              | 6.3          | 1076   | Domain in proteasome component, COP9-complex and eIF3 (PCI) |
| Other               | Y66D12A.9      | Y66D12A.9                                                 |                  | III | 1          | 3                    | 3              | 22.2         | 248    | proteasome activator                                        |
| Other               | Y16B4A.2       | Y16B4A.2                                                  |                  | X   | 1          | 3                    | 3              | 2.4          | 2105   | serine carboxypeptidase                                     |
| Other               | T25B6.2        | T25B6.2                                                   |                  | X   | 1          | 3                    | 3              | 8.8          | 798    | zinc metalloprotease                                        |
| Other               | F59E10.2       | F59E10.2                                                  | <i>cyp-4</i>     | II  | 1          | 3                    | 3              | 11.9         | 523    | cyclophilin                                                 |
| Other               | ZK546.14       | ZK546.14                                                  |                  | II  | 1          | 2                    | 3              | 7.4          | 472    | Surfeit locus protein 6                                     |
| Other               | Y49E10.4       | Y49E10.4                                                  |                  | III | 1          | 2                    | 2              | 6.2          | 436    | Thioredoxin                                                 |
| Other               | Y39B6A.14      | Y39B6A.14                                                 |                  | V   | 1          | 2                    | 2              | 6.8          | 548    | ARM/SDA1-actin binding                                      |
| Other               | R09B3.4        | R09B3.4                                                   | <i>ubc-12</i>    | I   | 1          | 2                    | 2              | 22.8         | 180    | Ubiquitin-conjugating enzymes                               |
| Other               | H06I04.4       | H06I04.4                                                  | <i>ubl-1</i>     | III | 1          | 2                    | 2              | 11.7         | 163    | UBiquitin-Like family gene class                            |
| Unknown             | C23G10.8       | C23G10.8                                                  |                  | III | 2          | 4                    | 8              | 12.5         | 937    | S. pombe adenylyl cyclase-associated protein (weak)         |
| Unknown             | Y67H2A.5       | Y67H2A.5                                                  |                  | IV  | 2          | 8                    | 20             | 40.7         | 145    |                                                             |
| Unknown             | R07E5.15       | R07E5.15                                                  |                  | III | 2          | 6                    | 18             | 15           | 253    |                                                             |
| Unknown             | F59B1.2        | F59B1.2                                                   |                  | V   | 2          | 4                    | 17             | 42.2         | 161    |                                                             |
| Unknown             | W06H3.1        | W06H3.1                                                   |                  | V   | 2          | 14                   | 16             | 19.3         | 663    |                                                             |
| Unknown             | M70.3          | M70.3                                                     |                  | IV  | 2          | 8                    | 16             | 13.8         | 915    |                                                             |
| Unknown             | C34B2.8        | C34B2.8                                                   |                  | I   | 2          | 8                    | 16             | 46.2         | 171    | GRIM-19 domain                                              |
| Unknown             | Y73B6BL.24     | Y73B6BL.24                                                |                  | IV  | 2          | 9                    | 13             | 39.6         | 381    |                                                             |
| Unknown             | T23F11.2       | T23F11.2                                                  |                  | III | 2          | 7                    | 13             | 15           | 253    |                                                             |
| Unknown             | F42G4.6        | F42G4.6                                                   |                  | II  | 2          | 7                    | 10             | 22.9         | 279    |                                                             |
| Unknown             | Y81G3A.1       | Y81G3A.1                                                  |                  | II  | 2          | 6                    | 9              | 21.4         | 243    |                                                             |
| Unknown             | Y53C10A.10     | Y53C10A.10                                                |                  | I   | 2          | 6                    | 9              | 4            | 627    |                                                             |
| Unknown             | Y1A5A.1        | Y1A5A.1                                                   |                  | III | 2          | 6                    | 9              | 23.4         | 192    | LIM domain                                                  |
| Unknown             | T16G1.7        | T16G1.7                                                   |                  | V   | 2          | 6                    | 9              | 13.1         | 436    |                                                             |
| Unknown             | F58D5.7        | F58D5.7                                                   |                  | I   | 2          | 5                    | 9              | 18.2         | 258    |                                                             |
| Unknown             | F08D12.1       | F08D12.1                                                  |                  | II  | 2          | 5                    | 9              | 10.5         | 694    | TPR Repeat, SRP                                             |
| Unknown             | C38C10.3       | C38C10.3                                                  |                  | III | 2          | 8                    | 8              | 30.6         | 301    |                                                             |
| Unknown             | W05H9.1        | W05H9.1                                                   |                  | X   | 2          | 4                    | 7              | 4.6          | 414    |                                                             |
| Unknown             | F17E9.3        | F17E9.3                                                   |                  | IV  | 2          | 2                    | 7              | 14.2         | 155    |                                                             |
| Unknown             | M70.1          | M70.1                                                     |                  | IV  | 2          | 5                    | 6              | 7.3          | 931    |                                                             |
| Unknown             | F27C1.3        | F27C1.3                                                   |                  | I   | 2          | 5                    | 6              | 35.9         | 262    |                                                             |
| Unknown             | ZK484.3        | ZK484.3                                                   |                  | I   | 2          | 2                    | 6              | 12           | 332    |                                                             |
| Unknown             | Y54E10BR.4     | Y54E10BR.4                                                |                  | I   | 2          | 5                    | 5              | 9.1          | 364    |                                                             |
| Unknown             | M7.9           | M7.9                                                      |                  | IV  | 2          | 5                    | 5              | 12.4         | 170    |                                                             |
| Unknown             | T16G1.6        | T16G1.4/5/6                                               |                  | V   | 2          | 4                    | 5              | 4            | 446    |                                                             |
| Unknown             | T16G1.5        | T16G1.4/5/6                                               |                  | V   | 2          | 4                    | 5              | 4.1          | 434    |                                                             |
| Unknown             | T16G1.4        | T16G1.4/5/6                                               |                  | V   | 2          | 4                    | 5              | 4.1          | 436    |                                                             |
| Unknown             | F48G7.12       | F48G7.12                                                  |                  | V   | 2          | 4                    | 5              | 4.1          | 444    |                                                             |
| Unknown             | R186.7         | R186.7                                                    |                  | V   | 2          | 3                    | 5              | 13.1         | 359    | Pinin SDK                                                   |
| Unknown             | B0464.6        | B0464.6                                                   |                  | III | 2          | 3                    | 5              | 6.6          | 609    |                                                             |
| Unknown             | Y110A7A.15     | Y110A7A.15                                                |                  | I   | 2          | 2                    | 5              | 9.4          | 481    |                                                             |
| Unknown             | ZC412.5        | ZC412.5                                                   |                  | V   | 2          | 4                    | 4              | 19           | 168    |                                                             |
| Unknown             | R10E9.2        | R10E9.2                                                   |                  | III | 2          | 4                    | 4              | 23.6         | 259    |                                                             |
| Unknown             | T20D3.2        | T20D3.2                                                   |                  | IV  | 2          | 3                    | 4              | 9            | 234    |                                                             |
| Unknown             | F43C11.2       | F43C11.2                                                  |                  | II  | 1          | 10                   | 23             | 34.9         | 169    |                                                             |
| Unknown             | F54A3.5        | F54A3.5                                                   |                  | II  | 1          | 9                    | 14             | 62.9         | 105    |                                                             |
| Unknown             | B0491.5        | B0491.5                                                   |                  | III | 1          | 8                    | 10             | 31.5         | 327    |                                                             |
| Unknown             | F59B2.12       | F59B2.12                                                  |                  | III | 1          | 7                    | 10             | 8.5          | 918    |                                                             |
| Unknown             | Y54E10BL.5     | Y54E10BL.5                                                |                  | I   | 1          | 4                    | 10             | 46.3         | 121    |                                                             |
| Unknown             | W09D6.4        | W09D6.4                                                   |                  | III | 1          | 2                    | 10             | 18.9         | 148    |                                                             |
| Unknown             | F17C8.3        | F17C8.3                                                   |                  | III | 1          | 5                    | 9              | 2.3          | 973    |                                                             |
| Unknown             | Y71F9AL.9      | Y71F9AL.9                                                 |                  | I   | 1          | 4                    | 8              | 18.2         | 314    |                                                             |
| Unknown             | Y62H9A.4       | Y62H9A.4                                                  |                  | X   | 1          | 3                    | 8              | 16.5         | 212    |                                                             |
| Unknown             | C12D12.1       | C12D12.1                                                  |                  | X   | 1          | 3                    | 8              | 6.1          | 769    |                                                             |
| Unknown             | Y59E9AL.6      | Y59E9AL.6                                                 |                  | IV  | 1          | 6                    | 7              | 18.7         | 214    |                                                             |
| Unknown             | F20A1.6        | F20A1.6                                                   |                  | V   | 1          | 4                    | 7              | 27.9         | 219    |                                                             |
| Unknown             | W04C9.2        | W04C9.2                                                   |                  | I   | 1          | 3                    | 7              | 47.1         | 102    |                                                             |
| Unknown             | C48B4.12       | C48B4.12                                                  |                  | III | 1          | 3                    | 7              | 14.2         | 190    |                                                             |
| Unknown             | K01H12.4       | K01H12.4                                                  |                  | IV  | 1          | 2                    | 7              | 12.5         | 329    |                                                             |
| Unknown             | Y37D8A.2       | Y37D8A.2                                                  |                  | III | 1          | 5                    | 6              | 12.1         | 571    | EGF                                                         |
| Unknown             | T12A2.5        | T12A2.5                                                   |                  | III | 1          | 4                    | 6              | 6.4          | 994    |                                                             |
| Unknown             | Y111B2A.2      | Y111B2A.2                                                 |                  | III | 1          | 3                    | 6              | 32.6         | 86     |                                                             |
| Unknown             | M02D8.1        | M02D8.1                                                   |                  | X   | 1          | 3                    | 6              | 25.4         | 197    | IG                                                          |
| Unknown             | F57B1.2        | F57B1.2                                                   | <i>sun-1</i>     | V   | 1          | 2                    | 6              | 8.2          | 473    | unc-84 like                                                 |
| Unknown             | T08G11.2       | T08G11.2                                                  | <i>egl-32</i>    | I   | 1          | 5                    | 5              | 25.2         | 282    | SH2 motif                                                   |
| Unknown             | F53B6.7        | F53B6.7                                                   |                  | I   | 1          | 5                    | 5              | 28.9         | 287    |                                                             |
| Unknown             | F42G8.10       | F42G8.10                                                  |                  | IV  | 1          | 5                    | 5              | 34.8         | 181    |                                                             |
| Unknown             | Y57G7A.6       | Y57G7A.6                                                  |                  | II  | 1          | 4                    | 5              | 7.4          | 883    |                                                             |
| Unknown             | Y38F1A.1       | Y38F1A.1                                                  |                  | II  | 1          | 4                    | 5              | 29           | 241    | CRISPR                                                      |
| Unknown             | T10B5.3        | T10B5.3                                                   |                  | V   | 1          | 4                    | 5              | 14.2         | 295    |                                                             |
| Unknown             | F44F4.10       | F44F4.10                                                  |                  | II  | 1          | 4                    | 5              | 15.7         | 280    |                                                             |
| Unknown             | C50F4.3        | C50F4.3                                                   |                  | V   | 1          | 4                    | 5              | 14.7         | 374    | thiol protease                                              |
| Unknown             | C36F7.5        | C36F7.5                                                   |                  | I   | 1          | 4                    | 5              | 30.7         | 322    |                                                             |
| Unknown             | Y73E7A.2       | Y73E7A.2                                                  |                  | I   | 1          | 3                    | 5              | 8.2          | 585    |                                                             |
| Unknown             | Y54E10A.12     | Y54E10A.12                                                |                  | I   | 1          | 2                    | 5              | 6.2          | 547    |                                                             |
| Unknown             | T25C12.3       | T25C12.3                                                  |                  | X   | 1          | 2                    | 5              | 2.1          | 2014   | EGF-repeats                                                 |
| Unknown             | R102.7         | R102.7                                                    |                  | IV  | 1          | 2                    | 5              | 5.1          | 587    |                                                             |
| Unknown             | F58G6.6        | F58G6.6                                                   | <i>del-2</i>     | IV  | 1          | 2                    | 5              | 7.7          | 583    |                                                             |

Supplemental Table 2 Low abundance spermatogenic proteins copurified with chromatin (≤2 occurrences)

| Functional Category | Predicted Gene | Family ID<br>(when peptides identify more than 1 protein) | <i>C. elegans</i> locus | LG  | Abundance  |                      | Sequence Count | Coverage (%) | Length | Descriptor                                        |
|---------------------|----------------|-----------------------------------------------------------|-------------------------|-----|------------|----------------------|----------------|--------------|--------|---------------------------------------------------|
|                     |                |                                                           |                         |     | Occurrence | Total Spectrum Count |                |              |        |                                                   |
| Unknown             | BE10.1         | BE10.1                                                    |                         | III | 1          | 2                    | 5              | 8            | 324    |                                                   |
| Unknown             | ZK637.12       | ZK637.12                                                  |                         | III | 1          | 4                    | 4              | 16.9         | 213    |                                                   |
| Unknown             | Y57G11C.14     | Y57G11C.14                                                |                         | IV  | 1          | 4                    | 4              | 18.2         | 242    |                                                   |
| Unknown             | Y34B4A.6       | Y34B4A.6                                                  |                         | X   | 1          | 4                    | 4              | 14.7         | 231    |                                                   |
| Unknown             | T25B9.6        | T25B9.6                                                   |                         | IV  | 1          | 4                    | 4              | 7            | 610    |                                                   |
| Unknown             | F32B6.4        | F32B6.4                                                   |                         | IV  | 1          | 4                    | 4              | 21.5         | 223    |                                                   |
| Unknown             | B0205.10       | B0205.10                                                  |                         | I   | 1          | 4                    | 4              | 15.4         | 455    | Proline-rich extensin                             |
| Unknown             | Y32H12A.2      | Y32H12A.2                                                 |                         | III | 1          | 3                    | 4              | 7.2          | 610    |                                                   |
| Unknown             | W08A12.1       | W08A12.1                                                  |                         | V   | 1          | 3                    | 4              | 7.4          | 501    |                                                   |
| Unknown             | T08B6.4        | T08B6.4                                                   |                         | IV  | 1          | 3                    | 4              | 8.2          | 661    |                                                   |
| Unknown             | K05C4.5        | K05C4.5                                                   |                         | I   | 1          | 3                    | 4              | 4.7          | 656    |                                                   |
| Unknown             | F49C12.7       | F49C12.7                                                  |                         | IV  | 1          | 3                    | 4              | 14.9         | 444    |                                                   |
| Unknown             | F22F7.1        | F22F7.1                                                   |                         | V   | 1          | 3                    | 4              | 10.1         | 426    |                                                   |
| Unknown             | C24A11.1       | C24A11.1                                                  |                         | I   | 1          | 3                    | 4              | 17.8         | 202    |                                                   |
| Unknown             | B0273.1        | B0273.1                                                   |                         | IV  | 1          | 3                    | 4              | 16.6         | 223    |                                                   |
| Unknown             | Y48C3A.7       | Y48C3A.7                                                  | <i>mac-1</i>            | II  | 1          | 2                    | 4              | 5            | 813    | ATPase AAA (proteosome?)                          |
| Unknown             | Y47D3A.13      | Y47D3A.13                                                 |                         | III | 1          | 2                    | 4              | 20.6         | 136    |                                                   |
| Unknown             | T01B7.5        | T01B7.5                                                   |                         | II  | 1          | 2                    | 4              | 7.4          | 407    | Sas10/Utp3                                        |
| Unknown             | F44G4.2        | F44G4.2                                                   |                         | II  | 1          | 2                    | 4              | 11.2         | 160    |                                                   |
| Unknown             | F10D2.10       | F10D2.10                                                  |                         | V   | 1          | 2                    | 4              | 12.7         | 346    |                                                   |
| Unknown             | Y57G7A.5       | Y57G7A.5                                                  |                         | II  | 1          | 3                    | 3              | 17.2         | 244    |                                                   |
| Unknown             | Y57A10A.27     | Y57A10A.27                                                |                         | II  | 1          | 3                    | 3              | 10.8         | 388    |                                                   |
| Unknown             | Y49F6B.2       | Y49F6B.2                                                  |                         | II  | 1          | 3                    | 3              | 17.1         | 252    |                                                   |
| Unknown             | W03D8.3        | W03D8.3                                                   |                         | I   | 1          | 3                    | 3              | 14.6         | 130    | Thrombospondin type 3 repeat                      |
| Unknown             | T12D8.9        | T12D8.9                                                   |                         | III | 1          | 3                    | 3              | 8.3          | 971    |                                                   |
| Unknown             | R07B7.3        | R07B7.3                                                   | <i>pqn-53</i>           | V   | 1          | 3                    | 3              | 8.2          | 355    |                                                   |
| Unknown             | R02F2.7        | R02F2.7                                                   |                         | III | 1          | 3                    | 3              | 8.7          | 693    |                                                   |
| Unknown             | F43C11.1       | F43C11.1                                                  |                         | II  | 1          | 3                    | 3              | 12.9         | 171    |                                                   |
| Unknown             | F32H2.7        | F32H2.7                                                   |                         | I   | 1          | 3                    | 3              | 16.5         | 395    |                                                   |
| Unknown             | C54G4.3        | C54G4.3                                                   |                         | I   | 1          | 3                    | 3              | 11           | 245    |                                                   |
| Unknown             | C34E10.1       | C34E10.1                                                  | <i>gap-3</i>            | III | 1          | 3                    | 3              | 11.3         | 434    | Surface antigen                                   |
| Unknown             | C18E9.4        | C18E9.4                                                   |                         | II  | 1          | 3                    | 3              | 22.3         | 103    |                                                   |
| Unknown             | C16C8.8        | C16C8.8                                                   |                         | II  | 1          | 3                    | 3              | 14.4         | 139    |                                                   |
| Unknown             | B0240.2        | B0240.2                                                   |                         | V   | 1          | 3                    | 3              | 2.7          | 1247   |                                                   |
| Unknown             | Y71G10AR.2     | Y71G10AR.2                                                |                         | IV  | 1          | 2                    | 3              | 19.5         | 231    |                                                   |
| Unknown             | Y45G5AM.7      | Y45G5AM.7                                                 |                         | V   | 1          | 2                    | 3              | 6.5          | 433    |                                                   |
| Unknown             | T19B10.4       | T19B10.4                                                  | <i>pqn-70</i>           | V   | 1          | 2                    | 3              | 15.2         | 243    |                                                   |
| Unknown             | M162.7         | M162.7                                                    |                         | V   | 1          | 2                    | 3              | 3.9          | 690    |                                                   |
| Unknown             | K07G5.6        | K07G5.6                                                   |                         | I   | 1          | 2                    | 3              | 11.8         | 374    |                                                   |
| Unknown             | K04F10.7       | K04F10.7                                                  |                         | I   | 1          | 2                    | 3              | 6.5          | 293    |                                                   |
| Unknown             | F57B9.5        | F57B9.5                                                   | <i>byn-1</i>            | III | 1          | 2                    | 3              | 8.2          | 449    | bystin                                            |
| Unknown             | F47B3.5        | F47B3.5/F47B3.4                                           |                         | I   | 1          | 2                    | 3              | 10.1         | 199    |                                                   |
| Unknown             | F47B3.4        | F47B3.5/F47B3.4                                           |                         | I   | 1          | 2                    | 3              | 7.1          | 281    |                                                   |
| Unknown             | F44E5.1        | F44E5.1                                                   |                         | II  | 1          | 2                    | 3              | 16.7         | 78     |                                                   |
| Unknown             | F29C4.2        | F29C4.2                                                   |                         | IV  | 1          | 2                    | 3              | 24.4         | 90     |                                                   |
| Unknown             | C41G7.3        | C41G7.3                                                   |                         | I   | 1          | 2                    | 3              | 8            | 553    | TspO/MBR family                                   |
| Unknown             | R05F9.10       | R05F9.10                                                  |                         | I   | 1          | 2                    | 2              | 8            | 337    | TPR domain repeats                                |
| Unknown             | M01A10.5       | M01A10.5                                                  | <i>pqn-52</i>           | I   | 1          | 2                    | 2              | 8.2          | 282    |                                                   |
| Unknown             | K11D12.6       | K11D12.6                                                  |                         | V   | 1          | 2                    | 2              | 12.4         | 186    |                                                   |
| Unknown             | F58D2.2        | F58D2.2                                                   |                         | IV  | 1          | 2                    | 2              | 3.3          | 610    |                                                   |
| Unknown             | F31E8.5        | F31E8.5                                                   |                         | II  | 1          | 2                    | 2              | 8.9          | 461    |                                                   |
| Unknown             | F28B1.2        | F28B1.2                                                   |                         | V   | 1          | 2                    | 2              | 5.2          | 973    |                                                   |
| Unknown             | F02C9.4        | F02C9.4                                                   |                         | V   | 1          | 2                    | 2              | 15.3         | 202    | Epidermal growth-factor receptor (EGFR), L domain |
| Unknown             | C24D10.6       | C24D10.6                                                  |                         | IV  | 1          | 2                    | 2              | 19.3         | 161    |                                                   |
| Unknown             | C15H9.9        | C15H9.9                                                   |                         | X   | 1          | 2                    | 2              | 30.7         | 137    |                                                   |
| Unknown             | C14A4.14       | C14A4.14                                                  |                         | II  | 1          | 2                    | 2              | 8.4          | 418    |                                                   |
| Unknown             | C03C11.1       | C03C11.1                                                  |                         | I   | 1          | 2                    | 2              | 28.1         | 199    |                                                   |
| Unknown             | B0207.11       | B0207.11                                                  |                         | I   | 1          | 2                    | 2              | 11.4         | 273    | SH2 motif                                         |

Functional Category determination is described in Supplemental Methods; Family ID, designation for families of proteins not differentiated by a set of identifying peptides; LG, chromosomal location; Occurrences, the number of preparations in which a protein was identified out of 6 spermatogenic preparations; Total Spectrum Count, the total number of peptides detected for each protein from all preparations; Sequence Count, the number of distinct MS/MS spectra collected from all preparations; Coverage, % of protein represented by uniquely identified peptides; Length, number of amino acids in protein; Descriptor, protein description through homology or provided in WormBase, Worm Protein Database (BIOBASE) annotations.

Supplemental Table 3 All shared proteins copurified with spermatogenic and oogenic chromatin (540)

| Functional Category | Predicted Gene | Family ID (when peptides identify more than 1 protein) | C. elegans locus     | LG  | Oogenic        |                            |                   |                   | Spermatogenic  |                            |                   |                   | Abundance Ratio | Length | Descriptor                               |
|---------------------|----------------|--------------------------------------------------------|----------------------|-----|----------------|----------------------------|-------------------|-------------------|----------------|----------------------------|-------------------|-------------------|-----------------|--------|------------------------------------------|
|                     |                |                                                        |                      |     | Occur-<br>renc | Total<br>Spectrum<br>Count | Sequence<br>Count | Cover-<br>age (%) | Occur-<br>renc | Total<br>Spectrum<br>Count | Sequence<br>Count | Cover-<br>age (%) |                 |        |                                          |
| DNA                 | ZK131.10       | Histone H2A                                            | <i>his-16</i>        | II  | 5              | 775                        | 59                | 58.3              | 6              | 1680                       | 87                | 64.6              | 2.2             | 127    | Histone H2A                              |
| DNA                 | ZK131.6        | Histone H2A                                            | <i>his-12</i>        | II  | 5              | 775                        | 59                | 58.3              | 6              | 1680                       | 87                | 64.6              | 2.2             | 127    | Histone H2A                              |
| DNA                 | B0035.7        | Histone H2A                                            | <i>his-47</i>        | IV  | 5              | 773                        | 59                | 58.3              | 6              | 1679                       | 87                | 64.6              | 2.2             | 127    | Histone H2A                              |
| DNA                 | F07B7.10       | Histone H2A                                            | <i>his-51</i>        | V   | 5              | 773                        | 59                | 58.3              | 6              | 1679                       | 87                | 64.6              | 2.2             | 127    | Histone H2A                              |
| DNA                 | F07B7.3        | Histone H2A                                            | <i>his-53</i>        | V   | 5              | 773                        | 59                | 58.3              | 6              | 1679                       | 87                | 64.6              | 2.2             | 127    | Histone H2A                              |
| DNA                 | F08G2.2        | Histone H2A                                            | <i>his-43</i>        | II  | 5              | 773                        | 59                | 58.3              | 6              | 1679                       | 87                | 64.6              | 2.2             | 127    | Histone H2A                              |
| DNA                 | F17E9.13       | Histone H2A                                            | <i>his-39</i>        | IV  | 5              | 773                        | 59                | 58.3              | 6              | 1679                       | 87                | 64.6              | 2.2             | 127    | Histone H2A                              |
| DNA                 | F35H10.1       | Histone H2A                                            | <i>his-30</i>        | IV  | 5              | 773                        | 59                | 58.3              | 6              | 1679                       | 87                | 64.6              | 2.2             | 127    | Histone H2A                              |
| DNA                 | F45F2.4        | Histone H2A                                            | <i>his-7</i>         | V   | 5              | 773                        | 59                | 58.3              | 6              | 1679                       | 87                | 64.6              | 2.2             | 127    | Histone H2A                              |
| DNA                 | F54E12.5       | Histone H2A                                            | <i>his-57</i>        | IV  | 5              | 773                        | 59                | 58.3              | 6              | 1679                       | 87                | 64.6              | 2.2             | 127    | Histone H2A                              |
| DNA                 | F55G1.10       | Histone H2A                                            | <i>his-61</i>        | IV  | 5              | 773                        | 59                | 58.3              | 6              | 1679                       | 87                | 64.6              | 2.2             | 127    | Histone H2A                              |
| DNA                 | H0212.7        | Histone H2A                                            | <i>his-65</i>        | IV  | 5              | 773                        | 59                | 58.3              | 6              | 1679                       | 87                | 64.6              | 2.2             | 127    | Histone H2A                              |
| DNA                 | K06C4.11       | Histone H2A                                            | <i>his-19</i>        | V   | 5              | 773                        | 59                | 58.3              | 6              | 1679                       | 87                | 64.6              | 2.2             | 127    | Histone H2A                              |
| DNA                 | K06C4.3        | Histone H2A                                            | <i>his-21</i>        | V   | 5              | 773                        | 59                | 58.3              | 6              | 1679                       | 87                | 64.6              | 2.2             | 127    | Histone H2A                              |
| DNA                 | T10C6.12       | Histone H2A                                            | <i>his-3</i>         | V   | 5              | 773                        | 59                | 58.3              | 6              | 1679                       | 87                | 64.6              | 2.2             | 127    | Histone H2A                              |
| DNA                 | T23D8.6        | Histone H2A                                            | <i>his-68</i>        | I   | 5              | 773                        | 59                | 58.3              | 6              | 1679                       | 87                | 64.6              | 2.2             | 127    | Histone H2A                              |
| DNA                 | C50F4.13       | Histone H2A                                            | <i>his-35</i>        | V   | 5              | 772                        | 58                | 52.8              | 6              | 1678                       | 87                | 64.6              | 2.2             | 127    | Histone H2A                              |
| DNA                 | W05B10.1       | Histone H3                                             |                      | V   | 5              | 122                        | 15                | 39.7              | 6              | 421                        | 22                | 30.9              | 3.5             | 136    | Histone H3                               |
| DNA                 | F45E1.6        | Histone H3                                             | <i>his-71</i>        | X   | 5              | 121                        | 14                | 31.6              | 6              | 420                        | 21                | 23.5              | 3.5             | 136    | Histone H3                               |
| DNA                 | Y49E10.6       | Histone H3                                             | <i>his-72</i>        | III | 5              | 122                        | 15                | 39.7              | 6              | 420                        | 21                | 23.5              | 3.4             | 136    | Histone H3                               |
| DNA                 | B0035.10       | Histone H3                                             | <i>his-45</i>        | IV  | 5              | 167                        | 32                | 32.4              | 6              | 357                        | 38                | 24.3              | 2.1             | 136    | Histone H3                               |
| DNA                 | F07B7.5        | Histone H3                                             | <i>his-49</i>        | V   | 5              | 167                        | 32                | 32.4              | 6              | 357                        | 38                | 24.3              | 2.1             | 136    | Histone H3                               |
| DNA                 | F08G2.3        | Histone H3                                             | <i>his-43</i>        | II  | 5              | 167                        | 32                | 32.4              | 6              | 357                        | 38                | 24.3              | 2.1             | 136    | Histone H3                               |
| DNA                 | F17E9.10       | Histone H3                                             | <i>his-32</i>        | IV  | 5              | 167                        | 32                | 32.4              | 6              | 357                        | 38                | 24.3              | 2.1             | 136    | Histone H3                               |
| DNA                 | F22B3.2        | Histone H3                                             | <i>his-63</i>        | IV  | 5              | 167                        | 32                | 32.4              | 6              | 357                        | 38                | 24.3              | 2.1             | 136    | Histone H3                               |
| DNA                 | F45F2.13       | Histone H3                                             | <i>his-6</i>         | V   | 5              | 167                        | 32                | 32.4              | 6              | 357                        | 38                | 24.3              | 2.1             | 136    | Histone H3                               |
| DNA                 | F54E12.1       | Histone H3                                             | <i>his-55</i>        | IV  | 5              | 167                        | 32                | 32.4              | 6              | 357                        | 38                | 24.3              | 2.1             | 136    | Histone H3                               |
| DNA                 | F55G1.2        | Histone H3                                             | <i>his-59</i>        | IV  | 5              | 167                        | 32                | 32.4              | 6              | 357                        | 38                | 24.3              | 2.1             | 136    | Histone H3                               |
| DNA                 | K06C4.13       | Histone H3                                             | <i>his-27</i>        | V   | 5              | 167                        | 32                | 32.4              | 6              | 357                        | 38                | 24.3              | 2.1             | 136    | Histone H3                               |
| DNA                 | K06C4.5        | Histone H3                                             | <i>his-17</i>        | V   | 5              | 167                        | 32                | 32.4              | 6              | 357                        | 38                | 24.3              | 2.1             | 136    | Histone H3                               |
| DNA                 | T10C6.13       | Histone H3                                             | <i>his-2</i>         | V   | 5              | 168                        | 33                | 39.7              | 6              | 357                        | 38                | 24.3              | 2.1             | 136    | Histone H3                               |
| DNA                 | ZK131.2        | Histone H3                                             | <i>his-25</i>        | II  | 5              | 168                        | 33                | 39.7              | 6              | 357                        | 38                | 24.3              | 2.1             | 136    | Histone H3                               |
| DNA                 | ZK131.3        | Histone H3                                             | <i>his-9</i>         | II  | 5              | 168                        | 33                | 39.7              | 6              | 357                        | 38                | 24.3              | 2.1             | 136    | Histone H3                               |
| DNA                 | ZK131.7        | Histone H3                                             | <i>his-13</i>        | II  | 5              | 168                        | 33                | 39.7              | 6              | 357                        | 38                | 24.3              | 2.1             | 136    | Histone H3                               |
| DNA                 | T10C6.11       | Histone H2B                                            | <i>his-4</i>         | V   | 5              | 123                        | 12                | 29.8              | 6              | 227                        | 31                | 56.7              | 1.8             | 141    | Histone H2B                              |
| DNA                 | ZK131.5        | Histone H2B                                            | <i>his-11</i>        | II  | 5              | 123                        | 12                | 34.4              | 6              | 226                        | 30                | 63.1              | 1.8             | 122    | Histone H2B                              |
| DNA                 | ZK131.9        | Histone H2B                                            | <i>his-15</i>        | II  | 5              | 123                        | 12                | 34.4              | 6              | 226                        | 30                | 63.1              | 1.8             | 122    | Histone H2B                              |
| DNA                 | F45F2.12       | Histone H2B                                            | <i>his-8</i>         | V   | 5              | 123                        | 12                | 34.4              | 6              | 225                        | 31                | 65                | 1.8             | 123    | Histone H2B                              |
| DNA                 | K06C4.12       | Histone H2B                                            | <i>his-22</i>        | V   | 5              | 123                        | 12                | 34.4              | 6              | 225                        | 31                | 65                | 1.8             | 123    | Histone H2B                              |
| DNA                 | K06C4.4        | Histone H2B                                            | <i>his-20</i>        | V   | 5              | 123                        | 12                | 34.4              | 6              | 225                        | 31                | 65                | 1.8             | 123    | Histone H2B                              |
| DNA                 | F07B7.11       | Histone H2B                                            | <i>his-54</i>        | V   | 5              | 123                        | 12                | 29.8              | 6              | 224                        | 31                | 56.7              | 1.8             | 141    | Histone H2B                              |
| DNA                 | F07B7.4        | Histone H2B                                            | <i>his-52</i>        | V   | 5              | 123                        | 12                | 29.8              | 6              | 224                        | 31                | 56.7              | 1.8             | 141    | Histone H2B                              |
| DNA                 | F17E9.9        | Histone H2B                                            | <i>his-34</i>        | IV  | 5              | 123                        | 12                | 34.4              | 6              | 224                        | 30                | 63.1              | 1.8             | 122    | Histone H2B                              |
| DNA                 | F35H10.11      | Histone H2B                                            | <i>his-29</i>        | IV  | 5              | 123                        | 12                | 34.4              | 6              | 224                        | 30                | 63.1              | 1.8             | 122    | Histone H2B                              |
| DNA                 | C50F4.5        | Histone H2B                                            | <i>his-41</i>        | V   | 5              | 123                        | 12                | 34.4              | 6              | 223                        | 30                | 52                | 1.8             | 123    | Histone H2B                              |
| DNA                 | F08G2.1        | Histone H2B                                            | <i>his-44</i>        | II  | 5              | 123                        | 12                | 34.4              | 6              | 223                        | 30                | 63.1              | 1.8             | 122    | Histone H2B                              |
| DNA                 | F54E12.4       | Histone H2B                                            | <i>his-58</i>        | IV  | 5              | 123                        | 12                | 34.4              | 6              | 223                        | 29                | 45.5              | 1.8             | 123    | Histone H2B                              |
| DNA                 | F55G1.3        | Histone H2B                                            | <i>his-62</i>        | IV  | 5              | 123                        | 12                | 34.4              | 6              | 223                        | 29                | 45.5              | 1.8             | 123    | Histone H2B                              |
| DNA                 | H0212.6        | Histone H2B                                            | <i>his-66</i>        | IV  | 5              | 123                        | 12                | 34.4              | 6              | 223                        | 29                | 45.5              | 1.8             | 123    | Histone H2B                              |
| DNA                 | B0035.8        | Histone H2B                                            | <i>his-48</i>        | IV  | 5              | 122                        | 12                | 34.4              | 6              | 222                        | 29                | 45.5              | 1.8             | 123    | Histone H2B                              |
| DNA                 | B0035.9        | Histone H4                                             | <i>his-46</i>        | IV  | 5              | 178                        | 27                | 65                | 6              | 190                        | 28                | 61.2              | 1.1             | 103    | Histone H4                               |
| DNA                 | C50F4.7        | Histone H4                                             | <i>his-37</i>        | V   | 5              | 178                        | 27                | 65                | 6              | 190                        | 28                | 61.2              | 1.1             | 103    | Histone H4                               |
| DNA                 | F07B7.9        | Histone H4                                             | <i>his-50</i>        | V   | 5              | 178                        | 27                | 65                | 6              | 190                        | 28                | 61.2              | 1.1             | 103    | Histone H4                               |
| DNA                 | F17E9.12       | Histone H4                                             | <i>his-31</i>        | IV  | 5              | 178                        | 27                | 65                | 6              | 190                        | 28                | 61.2              | 1.1             | 103    | Histone H4                               |
| DNA                 | F22B3.1        | Histone H4                                             | <i>his-64</i>        | IV  | 5              | 178                        | 27                | 65                | 6              | 190                        | 28                | 61.2              | 1.1             | 103    | Histone H4                               |
| DNA                 | F45F2.3        | Histone H4                                             | <i>his-5</i>         | V   | 5              | 178                        | 27                | 65                | 6              | 190                        | 28                | 61.2              | 1.1             | 103    | Histone H4                               |
| DNA                 | F54E12.3       | Histone H4                                             | <i>his-56</i>        | IV  | 5              | 178                        | 27                | 65                | 6              | 190                        | 28                | 61.2              | 1.1             | 103    | Histone H4                               |
| DNA                 | F55G1.11       | Histone H4                                             | <i>his-60</i>        | IV  | 5              | 178                        | 27                | 66.8              | 6              | 190                        | 28                | 53.4              | 1.1             | 118    | Histone H4                               |
| DNA                 | K03A1.6        | Histone H4                                             | <i>his-10 his-38</i> | X   | 5              | 178                        | 27                | 65                | 6              | 190                        | 28                | 61.2              | 1.1             | 103    | Histone H4                               |
| DNA                 | K06C4.10       | Histone H4                                             | <i>his-18</i>        | V   | 5              | 179                        | 27                | 65                | 6              | 190                        | 28                | 61.2              | 1.1             | 103    | Histone H4                               |
| DNA                 | K06C4.2        | Histone H4                                             | <i>his-28</i>        | V   | 5              | 179                        | 27                | 65                | 6              | 190                        | 28                | 61.2              | 1.1             | 103    | Histone H4                               |
| DNA                 | T10C6.14       | Histone H4                                             | <i>his-1</i>         | V   | 5              | 180                        | 28                | 65                | 6              | 190                        | 28                | 61.2              | 1.1             | 103    | Histone H4                               |
| DNA                 | T23D8.5        | Histone H4                                             | <i>his-67</i>        | I   | 5              | 180                        | 28                | 65                | 6              | 190                        | 28                | 61.2              | 1.1             | 103    | Histone H4                               |
| DNA                 | ZK131.1        | Histone H4                                             | <i>his-26</i>        | II  | 5              | 180                        | 28                | 65                | 6              | 190                        | 28                | 61.2              | 1.1             | 103    | Histone H4                               |
| DNA                 | ZK131.4        | Histone H4                                             | <i>his-10</i>        | II  | 5              | 180                        | 28                | 65                | 6              | 190                        | 28                | 61.2              | 1.1             | 103    | Histone H4                               |
| DNA                 | ZK131.8        | Histone H4                                             | <i>his-14</i>        | II  | 5              | 180                        | 28                | 65                | 6              | 190                        | 28                | 61.2              | 1.1             | 103    | Histone H4                               |
| DNA                 | F45F2.2        | F45F2.2                                                | <i>his-39</i>        | V   | 5              | 102                        | 7                 | 19.6              | 6              | 154                        | 20                | 32.1              | 1.5             | 112    | Histone H4                               |
| DNA                 | R08C7.3        | R08C7.3                                                |                      | IV  | 5              | 49                         | 14                | 48.6              | 6              | 142                        | 35                | 56.4              | 2.9             | 140    | Histone H2A variant                      |
| DNA                 | ZK1005.1       | ZK1005.1                                               | <i>pme-5</i>         | V   | 1              | 5                          | 5                 | 5.3               | 6              | 139                        | 73                | 32.2              | 27.8            | 2276   | poly (ADP-ribose) polymerase             |
| DNA                 | E03A3.3        | E03A3.3                                                | <i>his-69</i>        | III | 4              | 51                         | 6                 | 23.6              | 6              | 96                         | 9                 | 23.6              | 1.9             | 127    | Histone H3 variant                       |
| DNA                 | D2096.8        | D2096.8                                                |                      | IV  | 3              | 21                         | 8                 | 40.5              | 6              | 66                         | 14                | 42.4              | 3.1             | 316    | Nucleosome assembly protein (NAP)        |
| DNA                 | K12D12.1       | K12D12.1                                               |                      | II  | 4              | 79                         | 35                | 16.6              | 6              | 59                         | 30                | 16.8              | 0.7             | 1520   | DNA topoisomerase II                     |
| DNA                 | F32E10.6       | F32E10.6                                               |                      | IV  | 2              | 3                          | 2                 | 4.8               | 6              | 37                         | 18                | 44.4              | 12.3            | 374    | chromodomain                             |
| DNA                 | Y39A1C.3       | Y39A1C.3                                               |                      | III | 3              | 22                         | 7                 | 31.3              | 5              | 25                         | 12                | 41.2              | 1.1             | 294    | Cold-shock' DNA-binding domain           |
| DNA                 | F28B3.7        | F28B3.7                                                | <i>him-1</i>         | I   | 4              | 18                         | 11                | 7.8               | 5              | 24                         | 8                 | 9.4               | 1.3             | 1281   | SMC-1 protein                            |
| DNA                 | Y17G7A.1       | Y17G7A.1                                               | <i>hmg-12</i>        | II  | 2              | 6                          | 2                 | 9.2               | 5              | 20                         | 12                | 35.2              | 3.3             | 315    | HMG (high mobility group) box            |
| DNA                 | F55A3.3        | F55A3.3                                                |                      | I   | 1              | 7                          | 3                 | 5.2               | 5              | 14                         | 7                 | 10.6              | 2.0             | 1030   | factor                                   |
| DNA                 | E03A3.4        | E03A3.4                                                |                      | III | 1              | 11                         | 1                 | 11.1              | 4              | 36                         | 7                 | 26.2              | 3.3             | 126    | Histone H3                               |
| DNA                 | M163.3         | M163.3                                                 | <i>his-24</i>        | X   | 5              | 40                         | 8                 | 18.8              | 4              | 30                         | 7                 | 22.6              | 0.8             | 208    | Histone H1                               |
| DNA                 | M04F3.1        | M04F3.1                                                |                      | I   | 3              | 17                         | 7                 | 20.8              | 4              | 20                         | 10                | 29.5              | 1.2             | 288    | replication protein A2 32 kDa subunit    |
| DNA                 | ZK863.6        | ZK863.6                                                | <i>dpy-30</i>        | V   | 4              | 23                         | 15                | 29.4              | 4              | 19                         | 11                | 29.3              | 0.8             | 123    | dosage compensation component            |
| DNA                 | F01G4.1        | F01G4.1                                                | <i>psa-4</i>         | IV  | 2              | 49                         | 5                 | 6.9               | 3              | 90                         | 2                 | 3.6               | 1.8             | 1474   | SNF2alpha like                           |
| DNA                 | B0464.7        | B0464.7                                                | <i>baf-1</i>         | III | 2              | 11                         | 4                 | 42.7              | 3              | 24                         | 3                 | 42.7              | 2.2             | 89     | BAF domain (DNA binding)                 |
| DNA                 | C32F10.5       | C32F10.5                                               | <i>hmg-3</i>         | I   | 1              | 4                          | 3                 | 7.8               | 3              | 14                         | 9                 | 11.8              | 3.5             | 689    | single-strand recognition                |
| DNA                 | F32A11.4       | F32A11.4                                               |                      | II  | 3              | 16                         | 6                 | 8.6               | 3              | 12                         | 5                 | 10.9              | 0.8             | 654    | DNA topoisomerase II (N-terminal region) |
| DNA                 | Y47D3A.26      | Y47D3A.26                                              | <i>smc-3</i>         | III | 2              | 9                          | 6                 | 9                 | 3              | 11                         | 8                 | 9.1               | 1.2             | 1269   | SMC                                      |
| DNA                 | M106.1         | M106.1                                                 | <i>mix-1</i>         | II  | 2              | 6                          | 5                 | 7.4               | 3              | 10                         | 6                 | 7.6               | 1.7             | 1244   | mitotic and X-chromosome                 |
| DNA                 | Y73B6BL.9      | Y73B6BL.9                                              | <i>hli-2</i>         | IV  | 1              | 8                          | 2                 | 8.3               | 3              | 9                          | 6                 | 13.7              | 1.1             | 241    | Histone H1                               |
| DNA                 | C53A5.3        | C53A5.3                                                | <i>hda-1</i>         | V   | 2              | 12                         | 6                 | 22.3              | 3              | 9                          | 5                 | 11.1              | 0.8             | 461    | Yeast RPD3 protein like                  |
| DNA                 | C26D10.1       | C26D10.1                                               |                      |     |                |                            |                   |                   |                |                            |                   |                   |                 |        |                                          |

| Functional Category | Predicted Gene | Family ID<br>(when peptides identify more than 1 protein) | <i>C. elegans</i> locus | LG  | Oogenic        |                            |                   |                   | Spermatogenic  |                            |                   |                   | Abundance Ratio | Length | Descriptor                                                            |
|---------------------|----------------|-----------------------------------------------------------|-------------------------|-----|----------------|----------------------------|-------------------|-------------------|----------------|----------------------------|-------------------|-------------------|-----------------|--------|-----------------------------------------------------------------------|
|                     |                |                                                           |                         |     | Occur-<br>renc | Total<br>Spectrum<br>Count | Sequence<br>Count | Cover-<br>age (%) | Occur-<br>renc | Total<br>Spectrum<br>Count | Sequence<br>Count | Cover-<br>age (%) |                 |        |                                                                       |
|                     |                |                                                           |                         |     |                |                            |                   |                   |                |                            |                   |                   |                 |        |                                                                       |
| DNA                 | PAR2.1         | PAR2.1                                                    |                         | III | 2              | 2                          | 2                 | 14.7              | 1              | 4                          | 3                 | 30                | 2.0             | 170    | single strand binding protein                                         |
| DNA                 | C25G4.5        | C25G4.5                                                   | <i>dpy-26</i>           | IV  | 2              | 6                          | 3                 | 5.3               | 1              | 4                          | 3                 | 4.4               | 0.7             | 1263   | dosage-compensation protein<br>HMG box, Bromodomain (5 domains)       |
| DNA                 | C26C6.1        | C26C6.1                                                   |                         | I   | 4              | 12                         | 5                 | 4.6               | 1              | 3                          | 2                 | 1.9               | 0.3             | 1883   | Zinc finger                                                           |
| DNA                 | F54F2.2        | F54F2.2                                                   | <i>zfp-1</i>            | III | 1              | 4                          | 3                 | 7.5               | 1              | 2                          | 2                 | 2.5               | 0.5             | 867    | leucine zipper, PHD finger                                            |
| DNA                 | T05A7.4        | T05A7.4                                                   | <i>hmg-11</i>           | II  | 1              | 3                          | 2                 | 20.4              | 1              | 2                          | 2                 | 9.5               | 0.7             | 137    | nuclear phosphoprotein, DNA binding                                   |
| RNA                 | K07C5.4        | K07C5.4                                                   |                         | V   | 3              | 19                         | 12                | 27.2              | 6              | 262                        | 70                | 65.8              | 13.8            | 486    | snoRNA binding domain                                                 |
| RNA                 | W01B11.3       | W01B11.3                                                  |                         | X   | 1              | 8                          | 3                 | 11.1              | 6              | 246                        | 65                | 66.5              | 30.8            | 487    | Putative snoRNA binding domain                                        |
| RNA                 | F31E3.5        | F31E3.5                                                   | <i>eft-3</i>            | III | 5              | 326                        | 67                | 51.2              | 6              | 186                        | 45                | 58.1              | 0.6             | 463    | Elongation factor 1-alpha<br>Translation elongation factor EF-1-alpha |
| RNA                 | R03G5.1        | eft                                                       | <i>eft-4</i>            | X   | 5              | 326                        | 67                | 51.2              | 6              | 186                        | 45                | 58.1              | 0.6             | 463    | alpha                                                                 |
| RNA                 | B0041.4        | B0041.4                                                   | <i>rpl-4</i>            | I   | 5              | 66                         | 37                | 44.9              | 6              | 155                        | 57                | 50.1              | 2.3             | 345    | ribosomal protein L1                                                  |
| RNA                 | T01C3.7        | T01C3.7                                                   | <i>fib-1</i>            | V   | 2              | 7                          | 6                 | 27.6              | 6              | 147                        | 34                | 51.1              | 21.0            | 352    | fibrillarlin rRNA metabolism                                          |
| RNA                 | F53G12.10      | F53G12.10                                                 | <i>rpl-7</i>            | I   | 4              | 55                         | 27                | 43.9              | 6              | 128                        | 50                | 59.4              | 2.3             | 244    | Ribosomal protein                                                     |
| RNA                 | F25H2.10       | F25H2.10                                                  | <i>rps-0</i>            | I   | 4              | 34                         | 11                | 49.4              | 6              | 95                         | 26                | 49.7              | 2.8             | 312    | 60s Acidic ribosomal protein family                                   |
| RNA                 | F58E10.3       | F58E10.3                                                  |                         | V   | 4              | 15                         | 9                 | 20.7              | 6              | 94                         | 31                | 44.9              | 6.3             | 561    | ATP-dependent helicase (DEAD box)                                     |
| RNA                 | R13A5.8        | R13A5.8                                                   | <i>rpl-9</i>            | III | 4              | 37                         | 12                | 48.1              | 6              | 74                         | 20                | 48.1              | 2.0             | 189    | Ribosomal protein L9                                                  |
| RNA                 | F25H5.4        | F25H5.4                                                   | <i>eft-2</i>            | I   | 5              | 53                         | 29                | 34.2              | 6              | 61                         | 30                | 31.9              | 1.2             | 852    | Elongation factor Tu family                                           |
| RNA                 | B0250.1        | B0250.1                                                   | <i>rpl-2</i>            | V   | 4              | 24                         | 10                | 35.8              | 6              | 59                         | 18                | 39.2              | 2.5             | 260    | Ribosomal Proteins L2                                                 |
| RNA                 | C23G10.3       | C23G10.3                                                  | <i>rps-3</i>            | III | 5              | 30                         | 15                | 36                | 6              | 58                         | 25                | 42.5              | 1.9             | 247    | Ribosomal protein S3                                                  |
| RNA                 | K07H8.10       | K07H8.10                                                  |                         | IV  | 3              | 3                          | 3                 | 5.4               | 6              | 51                         | 17                | 15.7              | 17.0            | 798    | RNA-binding protein                                                   |
| RNA                 | Y106G6H.2      | Y106G6H.2                                                 | <i>pab-1</i>            | I   | 3              | 14                         | 9                 | 20.6              | 6              | 43                         | 20                | 37.5              | 3.1             | 646    | RNA recognition motif                                                 |
| RNA                 | C53H9.1        | C53H9.1                                                   | <i>rpl-27</i>           | I   | 3              | 13                         | 6                 | 19.9              | 6              | 37                         | 12                | 26.5              | 2.8             | 136    | 60S ribosomal protein L27                                             |
| RNA                 | C14B9.7        | C14B9.7                                                   | <i>rpl-21</i>           | III | 2              | 7                          | 3                 | 26.1              | 6              | 29                         | 7                 | 24.2              | 4.1             | 161    | Ribosomal protein L21                                                 |
| RNA                 | Y105E8A.16     | Y105E8A.16                                                | <i>rps-20</i>           | I   | 3              | 14                         | 8                 | 21.4              | 6              | 28                         | 14                | 22.2              | 2.0             | 117    | Ribosomal protein S10p/S20e family                                    |
| RNA                 | F54C9.1        | F54C9.1                                                   | <i>ift-2</i>            | II  | 1              | 4                          | 4                 | 11.2              | 5              | 107                        | 20                | 55.9              | 26.8            | 161    | initiation factor 5A                                                  |
| RNA                 | M28.5          | M28.5                                                     |                         | II  | 1              | 5                          | 3                 | 32.8              | 5              | 92                         | 24                | 61.7              | 18.4            | 128    | Ribosomal protein                                                     |
| RNA                 | C49H3.11       | C49H3.11                                                  | <i>rps-2</i>            | IV  | 5              | 54                         | 13                | 30.9              | 5              | 84                         | 19                | 30.9              | 1.6             | 272    | Ribosomal protein                                                     |
| RNA                 | Y48G8AL.8      | Y48G8AL.8                                                 | <i>rpl-17</i>           | I   | 4              | 30                         | 10                | 23                | 5              | 74                         | 23                | 36.4              | 2.5             | 187    | Ribosomal protein                                                     |
| RNA                 | ZC434.2        | ZC434.2                                                   | <i>rps-4</i>            | I   | 3              | 29                         | 5                 | 37.6              | 5              | 61                         | 5                 | 33                | 2.1             | 194    | 40S ribosomal protein S7                                              |
| RNA                 | F36A2.6        | F36A2.6                                                   | <i>rps-15</i>           | I   | 3              | 25                         | 10                | 46.4              | 5              | 48                         | 8                 | 47                | 1.9             | 151    | 40S ribosomal protein S15                                             |
| RNA                 | F13B10.2       | F13B10.2                                                  | <i>rpl-3</i>            | III | 3              | 18                         | 3                 | 13                | 5              | 41                         | 8                 | 23.9              | 2.3             | 401    | 60S ribosomal protein L3                                              |
| RNA                 | B0393.1        | B0393.1                                                   | <i>rps-0</i>            | X   | 3              | 12                         | 10                | 37                | 5              | 39                         | 14                | 47.8              | 3.3             | 276    | 40S ribosomal protein                                                 |
| RNA                 | Y43B11AR.4     | Y43B11AR.4                                                | <i>rps-4</i>            | IV  | 2              | 28                         | 14                | 30.1              | 5              | 37                         | 20                | 28.2              | 1.3             | 259    | Ribosomal family S4e family                                           |
| RNA                 | T05E11.1       | T05E11.1                                                  | <i>rps-5</i>            | IV  | 1              | 8                          | 4                 | 27.6              | 5              | 36                         | 10                | 41.9              | 4.5             | 210    | 40S ribosomal protein S5                                              |
| RNA                 | C50C3.6        | C50C3.6                                                   | <i>prp-8</i>            | III | 2              | 13                         | 7                 | 4.8               | 5              | 34                         | 15                | 8.5               | 2.6             | 2329   | US SNRNP-SPECIFIC PROTEIN                                             |
| RNA                 | F57B9.6        | F57B9.6                                                   | <i>inf-1</i>            | IV  | 2              | 10                         | 6                 | 21.6              | 5              | 28                         | 16                | 51                | 2.8             | 402    | ATPase RNA helicase                                                   |
| RNA                 | F56F3.5        | F56F3.5                                                   | <i>rps-1</i>            | III | 3              | 13                         | 8                 | 29.2              | 5              | 27                         | 10                | 37                | 2.1             | 257    | Ribosomal protein S3a (human)<br>homolog                              |
| RNA                 | Y71A12B.1      | Y71A12B.1                                                 | <i>rps-6</i>            | I   | 1              | 14                         | 5                 | 17.5              | 5              | 27                         | 7                 | 19.9              | 1.9             | 246    | Bromodomain family                                                    |
| RNA                 | F53A3.3        | F53A3.3                                                   | <i>rps-22</i>           | III | 3              | 10                         | 3                 | 13.8              | 5              | 22                         | 9                 | 40                | 2.2             | 130    | 40S ribosomal                                                         |
| RNA                 | F10G7.2        | F10G7.2                                                   | <i>tsn-1</i>            | II  | 4              | 43                         | 22                | 28.6              | 5              | 20                         | 7                 | 16.8              | 0.5             | 914    | RISC component, found in RNA<br>binding proteins                      |
| RNA                 | C26D10.2       | C26D10.2                                                  | <i>hel-1</i>            | II  | 2              | 20                         | 10                | 30.4              | 5              | 17                         | 14                | 30.8              | 0.9             | 425    | translation initiation factor eIF-4A                                  |
| RNA                 | F57B9.3        | F57B9.3                                                   |                         | III | 1              | 4                          | 3                 | 9.9               | 5              | 12                         | 5                 | 20.1              | 3.0             | 363    | ATPase RNA helicase: Euk initiation<br>factor 4A                      |
| RNA                 | Y71F9AL.13     | Y71F9AL.13                                                | <i>rpl-1</i>            | I   | 3              | 20                         | 8                 | 36.1              | 4              | 37                         | 11                | 34.7              | 1.9             | 216    | large ribosomal subunit L10a protein                                  |
| RNA                 | JC8.3          | JC8.3                                                     | <i>rpl-12</i>           | IV  | 2              | 13                         | 4                 | 22.4              | 4              | 34                         | 10                | 45.5              | 2.6             | 165    | Ribosomal protein                                                     |
| RNA                 | R151.3         | R151.3                                                    | <i>rpl-6</i>            | III | 2              | 21                         | 10                | 38.7              | 4              | 32                         | 9                 | 32.7              | 1.5             | 217    | Ribosomal protein ML16                                                |
| RNA                 | T05G5.10       | T05G5.10                                                  | <i>ift-1</i>            | III | 2              | 6                          | 6                 | 39.1              | 4              | 32                         | 16                | 53.4              | 5.3             | 161    | Initiation factor 5A                                                  |
| RNA                 | K11H12.2       | K11H12.2                                                  | <i>rpl-15</i>           | IV  | 2              | 14                         | 4                 | 16.7              | 4              | 29                         | 9                 | 26.5              | 2.1             | 204    | 60S ribosomal protein L15                                             |
| RNA                 | Y46G5A.4       | Y46G5A.4                                                  |                         | II  | 1              | 7                          | 5                 | 3.4               | 4              | 29                         | 18                | 12.5              | 4.1             | 2145   | RNA DEAD box helicase                                                 |
| RNA                 | F37C12.9       | F37C12.9                                                  | <i>rps-14</i>           | III | 2              | 12                         | 6                 | 30.3              | 4              | 28                         | 8                 | 44.1              | 2.3             | 152    | Ribosomal protein S14                                                 |
| RNA                 | T08B2.10       | T08B2.10                                                  | <i>rps-17</i>           | I   | 1              | 4                          | 3                 | 19.2              | 4              | 24                         | 6                 | 42.3              | 6.0             | 130    | 40S ribosomal protein S17                                             |
| RNA                 | T21G5.3        | T21G5.3                                                   | <i>gln-1</i>            | I   | 1              | 3                          | 2                 | 5.5               | 4              | 23                         | 18                | 20.8              | 7.7             | 763    | RNA DEAD box helicase                                                 |
| RNA                 | F23B2.6        | F23B2.6                                                   | <i>aly-2</i>            | IV  | 2              | 3                          | 2                 | 17.6              | 4              | 20                         | 5                 | 24.2              | 6.7             | 227    | Ref/ALY RNA export adaptor family                                     |
| RNA                 | F20D12.1       | F20D12.1                                                  |                         | IV  | 1              | 2                          | 2                 | 2.3               | 4              | 20                         | 15                | 18.6              | 10.0            | 1030   | PAZ piwi domain                                                       |
| RNA                 | C26E6.4        | C26E6.4                                                   |                         | III | 1              | 4                          | 4                 | 5.8               | 4              | 16                         | 11                | 12.7              | 4.0             | 1193   | DNA-directed RNA polymerase II                                        |
| RNA                 | Y37E3.10       | Y37E3.10                                                  |                         | I   | 2              | 12                         | 4                 | 20.8              | 4              | 12                         | 5                 | 18.1              | 1.0             | 342    | S1 RNA binding domain                                                 |
| RNA                 | Y97E10AR.5     | Y97E10AR.5                                                |                         | V   | 2              | 2                          | 2                 | 13.8              | 4              | 12                         | 8                 | 13.8              | 6.0             | 167    | RNA polymerase                                                        |
| RNA                 | T05F1.3        | T05F1.3                                                   | <i>rps-19</i>           | III | 1              | 3                          | 2                 | 19.9              | 4              | 11                         | 7                 | 37                | 3.7             | 146    | Ribosomal protein S19e                                                |
| RNA                 | Y45F10D.12     | Y45F10D.12                                                | <i>rpl-18</i>           | IV  | 1              | 9                          | 4                 | 13.8              | 3              | 38                         | 9                 | 31.9              | 4.2             | 188    | Eukaryotic ribosomal protein L18                                      |
| RNA                 | Y41E3.10       | Y41E3.10                                                  |                         | IV  | 5              | 37                         | 9                 | 36.5              | 3              | 36                         | 14                | 32.3              | 1.0             | 285    | Elongation factor 1 (beta/delta chain)                                |
| RNA                 | F54C9.5        | F54C9.5                                                   | <i>rpl-5</i>            | II  | 3              | 20                         | 11                | 33.3              | 3              | 34                         | 15                | 42.7              | 1.7             | 293    | 60S ribosomal protein L5                                              |
| RNA                 | F17C11.9       | F17C11.9                                                  |                         | V   | 5              | 41                         | 11                | 27.4              | 3              | 33                         | 8                 | 25.4              | 0.8             | 398    | Elongation factor 1-gamma                                             |
| RNA                 | Y62E10A.1      | Y62E10A.1                                                 | <i>rps-2</i>            | IV  | 1              | 8                          | 5                 | 80.9              | 3              | 33                         | 9                 | 80.9              | 4.1             | 110    | Acidic ribosomal subunit protein P2                                   |
| RNA                 | C07H6.5        | C07H6.5                                                   | <i>cgh-1</i>            | III | 3              | 9                          | 6                 | 7.4               | 3              | 29                         | 13                | 20.5              | 3.2             | 430    | RNA DEAD box helicase                                                 |
| RNA                 | F54H12.6       | F54H12.6                                                  |                         | III | 5              | 32                         | 9                 | 48.4              | 3              | 22                         | 6                 | 31.9              | 0.7             | 213    | Elongation factor<br>RNA polymerases L / 13 to 16 Kd<br>subunit       |
| RNA                 | W01G7.3        | W01G7.3                                                   |                         | II  | 2              | 10                         | 3                 | 24.6              | 3              | 22                         | 3                 | 24.6              | 2.2             | 122    | large ribosomal subunit                                               |
| RNA                 | Y106G6H.3      | Y106G6H.3                                                 | <i>rpl-30</i>           | I   | 1              | 6                          | 4                 | 38.1              | 3              | 19                         | 4                 | 38.1              | 3.2             | 113    | 60S ribosomal protein                                                 |
| RNA                 | F52B5.6        | F52B5.6                                                   | <i>rpl-25.2</i>         | I   | 1              | 3                          | 2                 | 6.2               | 3              | 18                         | 8                 | 39.7              | 6.0             | 146    | RNA recognition motif. (aka RRM,<br>RBD, or RNP domain)               |
| RNA                 | M18.7          | M18.7                                                     | <i>aly-3</i>            | IV  | 2              | 12                         | 5                 | 9.6               | 3              | 17                         | 4                 | 25                | 1.4             | 240    | ribosomal protein L10 (QM protein)                                    |
| RNA                 | F10B5.1        | F10B5.1                                                   | <i>rpl-10</i>           | II  | 1              | 17                         | 9                 | 36                | 3              | 17                         | 11                | 29                | 1.0             | 214    | ribosomal protein S11                                                 |
| RNA                 | F40F11.1       | F40F11.1                                                  | <i>rps-11</i>           | IV  | 3              | 10                         | 6                 | 11.6              | 3              | 16                         | 8                 | 18.1              | 1.6             | 155    | large ribosomal subunit L23 protein                                   |
| RNA                 | B0336.10       | B0336.10                                                  | <i>rpl-23</i>           | III | 2              | 13                         | 3                 | 27.1              | 3              | 16                         | 5                 | 35                | 1.2             | 140    | 60S ribosomal protein L19                                             |
| RNA                 | C09D4.5        | C09D4.5                                                   | <i>rpl-19</i>           | I   | 1              | 13                         | 2                 | 13.6              | 3              | 16                         | 6                 | 22.2              | 1.2             | 198    | Ribosomal protein                                                     |
| RNA                 | F28D1.7        | F28D1.7                                                   | <i>rps-23</i>           | IV  | 1              | 10                         | 5                 | 23.8              | 3              | 16                         | 7                 | 43.4              | 1.6             | 143    | lysyl-tRNA synthetase                                                 |
| RNA                 | T02G5.9        | T02G5.9                                                   | <i>krs-1</i>            | II  | 3              | 12                         | 8                 | 16.6              | 3              | 13                         | 6                 | 17.5              | 1.1             | 572    | glutamyl-tRNA synthetase                                              |
| RNA                 | ZC434.5        | ZC434.5                                                   | <i>qrs-3</i>            | I   | 2              | 17                         | 13                | 18.8              | 3              | 13                         | 7                 | 9.1               | 0.8             | 1149   | RNA DEAD box helicase                                                 |
| RNA                 | Y71H2AM.19     | Y71H2AM.19                                                |                         | III | 1              | 5                          | 2                 | 4.8               | 3              | 13                         | 3                 | 4.8               | 2.6             | 463    | Ribosomal protein                                                     |
| RNA                 | T07A9.11       | T07A9.11                                                  | <i>rps-24</i>           | IV  | 1              | 4                          | 3                 | 8.5               | 3              | 13                         | 2                 | 8.8               | 3.3             | 329    | RISC component, RNA binding                                           |
| RNA                 | F56D12.5       | F56D12.5                                                  | <i>vig-1</i>            | II  | 2              | 8                          | 4                 | 17.5              | 3              | 12                         | 7                 | 27.5              | 1.5             | 378    | Ribosomal protein                                                     |
| RNA                 | F42C5.8        | F42C5.8                                                   | <i>rps-8</i>            | IV  | 1              | 23                         | 5                 | 34.6              | 3              | 12                         | 7                 | 49                | 0.5             | 208    | Ribosomal protein                                                     |
| RNA                 | T24B8.1        | T24B8.1                                                   | <i>rpl-32</i>           | II  | 1              | 7                          | 4                 | 17.2              | 3              | 12                         | 5                 | 17.2              | 1.7             | 134    | small nuclear ribonucleoprotein SM<br>D3                              |
| RNA                 | Y116A8C.42     | Y116A8C.42                                                | <i>snr-1</i>            | IV  | 1              | 5                          | 3                 | 35.3              | 3              | 12                         | 7                 | 22.8              | 2.4             | 136    | 40S ribosomal protein S16                                             |
| RNA                 | T01C3.6        | T01C3.6                                                   | <i>rps-16</i>           | V   | 2              | 13                         | 8                 | 10.4              | 3              | 11                         | 6                 | 25.7              | 0.8             | 144    | 40S ribosomal protein S13                                             |
| RNA                 | C16A3.9        | C16A3.9                                                   | <i>rps-13</i>           | III | 2              | 5                          | 4                 | 23.8              | 3              | 11                         | 3                 | 17.9              | 2.2             | 151    | ribosomal protein                                                     |
| RNA                 | Y37E3.7        | Y37E3.7                                                   | <i>rps-1</i>            | I   | 1              | 7                          | 3                 | 41.4              | 3              | 11                         | 6                 | 74.8              | 1.6             | 111    | Pre-mRNA splicing factor activity                                     |
| RNA                 | T13H5.4        | T13H5.4                                                   |                         | II  | 1              | 5                          | 3                 | 9                 | 3              | 10                         | 3                 | 7.2               | 2.0             | 500    | emb-5 S1 RNA binding                                                  |
| RNA                 | T04A8.14       | T04A8.14                                                  | <i>emb-5</i>            | III | 3              | 3                          | 3                 | 4.1               | 3              | 9                          | 5                 | 6.5               | 3.0             | 1521   | RNA binding                                                           |
| RNA                 | F58D5.1        | F58D5.1                                                   |                         | I   | 2              | 10                         | 6                 | 13.6              | 3              | 9                          | 8                 | 20.3              | 0.9             | 611    | Translation elongation factor Tu 1                                    |
| RNA                 | Y71H2AM.23     | Y71H2AM.23                                                |                         | III | 2              | 12                         | 9                 | 18.5              | 3              | 8                          | 4                 | 11.5              | 0.7             | 496    | Double-stranded RNA binding motif (2<br>domains)                      |
| RNA                 | H15N14.1       | H15N14.1                                                  | <i>adr-1</i>            | I   | 2              | 7                          | 6                 | 11.9              | 3              | 8                          | 5                 | 10.8              | 1.1             | 959    | tRNA synthetase                                                       |
| RNA                 | Y41E3.4        | Y41E3.4                                                   | <i>ers-1</i>            | IV  | 3              | 20                         | 9                 | 18.3              | 3              | 7                          | 4                 | 13.2              | 0.4             | 786    |                                                                       |



| Functional Category | Predicted Gene | Family ID<br>(when peptides identify more than 1 protein) | <i>C. elegans</i> locus | LG  | Oogenic        |                            |                   |                   | Spermatogenic  |                            |                   |                   | Abundance Ratio | Length | Descriptor                                        |
|---------------------|----------------|-----------------------------------------------------------|-------------------------|-----|----------------|----------------------------|-------------------|-------------------|----------------|----------------------------|-------------------|-------------------|-----------------|--------|---------------------------------------------------|
|                     |                |                                                           |                         |     | Occur-<br>renc | Total<br>Spectrum<br>Count | Sequence<br>Count | Cover-<br>age (%) | Occur-<br>renc | Total<br>Spectrum<br>Count | Sequence<br>Count | Cover-<br>age (%) |                 |        |                                                   |
|                     |                |                                                           |                         |     |                |                            |                   |                   |                |                            |                   |                   |                 |        |                                                   |
| RNA                 | Y54E2A.11      | Y54E2A.11                                                 | <i>elf-3.B</i>          | II  | 1              | 2                          | 2                 | 1.5               | 3              | 6                          | 5                 | 9.2               | 3.0             | 725    | eukaryotic initiation factor                      |
| RNA                 | F40F8.10       | F40F8.10                                                  | <i>rsp-9</i>            | II  | 1              | 5                          | 5                 | 21.2              | 3              | 5                          | 3                 | 11.6              | 1.0             | 189    | Ribosomal protein                                 |
| RNA                 | Y71H2AM.18     | Y71H2AM.18                                                |                         | III | 1              | 3                          | 2                 | 9.5               | 3              | 5                          | 5                 | 14.6              | 1.7             | 328    | RNA DEAD box helicase                             |
| RNA                 | C37A2.7        | C37A2.7                                                   |                         | I   | 2              | 9                          | 3                 | 53.3              | 2              | 18                         | 6                 | 61.7              | 2.0             | 107    | Ribosomal protein                                 |
| RNA                 | F54E7.2        | F54E7.2                                                   | <i>rps-12</i>           | III | 1              | 7                          | 4                 | 39.3              | 2              | 18                         | 6                 | 52.1              | 2.6             | 140    | Ribosomal protein                                 |
| RNA                 | F37C12.4       | F37C12.4                                                  | <i>rpl-36</i>           | III | 1              | 7                          | 4                 | 21.2              | 2              | 15                         | 8                 | 44.2              | 2.1             | 104    | Ribosomal protein                                 |
| RNA                 | Y37E3.8        | Y37E3.8                                                   |                         | I   | 1              | 13                         | 5                 | 29                | 2              | 14                         | 6                 | 20.7              | 1.1             | 145    | Ribosomal protein                                 |
| RNA                 | C02B10.4       | C02B10.4                                                  |                         | IV  | 1              | 7                          | 2                 | 15.2              | 2              | 9                          | 4                 | 15.6              | 1.3             | 211    | RNA binding                                       |
| RNA                 | F56E10.4       | F56E10.4                                                  | <i>rps-27</i>           | V   | 3              | 8                          | 4                 | 31.3              | 2              | 8                          | 2                 | 15.7              | 1.0             | 83     | Ribosomal protein                                 |
| RNA                 | T22F3.4        | T22F3.4                                                   | <i>rpl-11.1</i>         | V   | 2              | 10                         | 4                 | 16.8              | 2              | 8                          | 5                 | 24                | 0.8             | 196    | 60S ribosomal protein L11                         |
| RNA                 | C01F6.5        | C01F6.5                                                   | <i>atly-1</i>           | IV  | 3              | 8                          | 4                 | 22.9              | 2              | 7                          | 3                 | 22.4              | 0.9             | 223    | RNA binding RNP-1                                 |
| RNA                 | T09B4.5        | T09B4.5                                                   |                         | I   | 3              | 12                         | 7                 | 20.5              | 2              | 6                          | 4                 | 18                | 0.5             | 327    | RNA binding                                       |
| RNA                 | Y116A8C.35     | Y116A8C.35                                                | <i>uat-2</i>            | IV  | 1              | 6                          | 3                 | 10.2              | 2              | 6                          | 3                 | 17.2              | 1.0             | 285    | RNA binding                                       |
| RNA                 | F10E7.7        | F10E7.7                                                   | <i>rpl-33</i>           | II  | 1              | 2                          | 2                 | 21.8              | 2              | 6                          | 3                 | 21.8              | 3.0             | 124    | Ribosomal protein                                 |
| RNA                 | Y59A8B.10      | Y59A8B.10                                                 |                         | V   | 1              | 3                          | 3                 | 9.9               | 2              | 4                          | 2                 | 9.9               | 1.3             | 413    | KH domain, RNA binding                            |
| RNA                 | F42A6.7        | F42A6.7                                                   | <i>hrp-1</i>            | IV  | 1              | 4                          | 2                 | 9.8               | 2              | 3                          | 3                 | 14.5              | 0.8             | 346    | RNA binding                                       |
| RNA                 | F45E4.2        | F45E4.2                                                   |                         | IV  | 1              | 2                          | 2                 | 9.7               | 2              | 3                          | 2                 | 13.3              | 1.5             | 226    | RNA binding or ss DNA binding                     |
| RNA                 | ZK381.4        | ZK381.4                                                   | <i>pgl-1</i>            | IV  | 2              | 4                          | 2                 | 5.5               | 2              | 7                          | 6                 | 9                 | 1.8             | 730    | RNA binding P-granule component                   |
| RNA                 | C27A2.2        | C27A2.2                                                   | <i>rpl-22</i>           | II  | 2              | 34                         | 8                 | 25.4              | 1              | 30                         | 9                 | 32.3              | 0.9             | 130    | Ribosomal protein                                 |
| RNA                 | C27A2.2        | C27A2.2                                                   | <i>rpl-22</i>           | II  | 2              | 34                         | 8                 | 25.4              | 1              | 30                         | 9                 | 32.3              | 0.9             | 130    | Ribosomal protein                                 |
| RNA                 | M01F1.2        | M01F1.2                                                   | <i>rpl-16</i>           | III | 1              | 13                         | 2                 | 11.9              | 1              | 16                         | 2                 | 13.4              | 1.2             | 202    | Ribosomal protein                                 |
| RNA                 | B0412.4        | B0412.4                                                   | <i>rps-29</i>           | III | 3              | 3                          | 3                 | 51.8              | 1              | 8                          | 4                 | 37.5              | 2.7             | 56     | 40S ribosomal protein                             |
| RNA                 | D2013.7        | D2013.7                                                   | <i>elf-3.F</i>          | I   | 2              | 2                          | 2                 | 14.3              | 1              | 8                          | 3                 | 14.3              | 4.0             | 294    | Eukaryotic Initiation Factor                      |
| RNA                 | F28C6.7        | F28C6.7                                                   | <i>rpl-26</i>           | II  | 2              | 2                          | 2                 | 16.9              | 1              | 7                          | 3                 | 16.9              | 3.5             | 142    | ribosomal protein L26 like                        |
| RNA                 | F07D10.1       | F07D10.1                                                  | <i>rpl-11.2</i>         | X   | 2              | 9                          | 3                 | 12.8              | 1              | 6                          | 4                 | 16.8              | 0.7             | 196    | Ribosomal protein                                 |
| RNA                 | H20J04.8       | H20J04.8                                                  |                         | II  | 2              | 2                          | 2                 | 9.9               | 1              | 6                          | 3                 | 17.4              | 3.0             | 253    | RNA processing factor, sap-1 (splicing)           |
| RNA                 | C12D8.11       | C12D8.11                                                  | <i>rop-1</i>            | V   | 2              | 2                          | 2                 | 3.9               | 1              | 5                          | 4                 | 11.8              | 2.5             | 643    | ROP-1 ribonucleoprotein RO                        |
| RNA                 | ZK652.4        | ZK652.4                                                   | <i>rpl-35</i>           | III | 1              | 2                          | 2                 | 7.3               | 1              | 5                          | 4                 | 16.3              | 2.5             | 123    | autoantigen                                       |
| RNA                 | Y57G11C.16     | Y57G11C.16                                                | <i>rps-18</i>           | IV  | 2              | 2                          | 2                 | 14.9              | 1              | 4                          | 3                 | 20.1              | 2.0             | 154    | ribosomal protein S13                             |
| RNA                 | F28H1.3        | F28H1.3                                                   | <i>ars-2</i>            | I   | 2              | 10                         | 6                 | 10                | 1              | 2                          | 2                 | 1.9               | 0.2             | 968    | aminoacyl-tRNA synthetase                         |
| RNA                 | F22D6.3        | F22D6.3                                                   | <i>nrs-1</i>            | I   | 1              | 5                          | 4                 | 13.2              | 1              | 2                          | 2                 | 5                 | 0.4             | 545    | tRNA synthetase                                   |
| RNA                 | Y24D9A.4       | Y24D9A.4                                                  | <i>rpl-7</i>            | II  | 2              | 15                         | 8                 | 29.8              | 2              | 42                         | 24                | 33.6              | 2.8             | 265    | ribosomal protein                                 |
| Housekeeping        | R05G6.7        | R05G6.7                                                   |                         | IV  | 4              | 56                         | 15                | 48.4              | 6              | 404                        | 41                | 74.2              | 7.2             | 283    | Channel Protein (mito)                            |
| Housekeeping        | T08B2.7        | T08B2.7                                                   |                         | I   | 5              | 50                         | 19                | 21.5              | 6              | 272                        | 67                | 49.9              | 5.4             | 781    | 3-hydroxyacyl-CoA dehydrogenase (mito)            |
| Housekeeping        | C34E10.6       | C34E10.6                                                  | <i>atp-2</i>            | III | 5              | 114                        | 22                | 54.5              | 6              | 204                        | 35                | 63.8              | 1.8             | 538    | ATP synthase beta chain (mito)                    |
| Housekeeping        | B0303.3        | B0303.3                                                   |                         | III | 4              | 30                         | 17                | 22.8              | 6              | 110                        | 43                | 41.7              | 3.7             | 448    | Acetyl-coa acetyltransferase                      |
| Housekeeping        | W10C8.5        | W10C8.5                                                   |                         | I   | 3              | 10                         | 5                 | 19.5              | 6              | 93                         | 27                | 45.4              | 9.3             | 399    | ATP transferase (mito)                            |
| Housekeeping        | F32B5.1        | F32B5.1                                                   |                         | II  | 2              | 9                          | 4                 | 13.8              | 6              | 87                         | 23                | 40                | 9.7             | 427    | phosphotransferase                                |
| Housekeeping        | D2023.2        | D2023.2                                                   | <i>pyc-1</i>            | III | 3              | 32                         | 19                | 22                | 6              | 85                         | 49                | 39.2              | 2.7             | 1175   | pyruvate carboxylase                              |
| Housekeeping        | H28O16.1       | H28O16.1                                                  |                         | I   | 5              | 43                         | 15                | 26.2              | 6              | 77                         | 21                | 34.4              | 1.8             | 538    | ATP synthase Alpha chain                          |
| Housekeeping        | C29F3.1        | C29F3.1                                                   | <i>ech-1</i>            | V   | 3              | 13                         | 6                 | 10.5              | 6              | 38                         | 10                | 16.7              | 2.9             | 755    | long-chain enoyl-CoA hydratase                    |
| Housekeeping        | T02H6.11       | T02H6.11                                                  |                         | II  | 1              | 7                          | 4                 | 34.6              | 6              | 37                         | 12                | 61.5              | 5.3             | 130    | complex subunit                                   |
| Housekeeping        | T24C4.1        | T24C4.1                                                   |                         | III | 1              | 3                          | 3                 | 8                 | 6              | 23                         | 14                | 21.1              | 7.7             | 427    | cytochrome c reductase (mito)                     |
| Housekeeping        | W02F12.5       | W02F12.5                                                  |                         | V   | 2              | 2                          | 2                 | 10                | 6              | 22                         | 8                 | 26.8              | 11.0            | 452    | 2-oxo acid dehydrogenases                         |
| Housekeeping        | C05E4.9        | C05E4.9                                                   | <i>gei-7</i>            | V   | 5              | 38                         | 25                | 30.4              | 5              | 89                         | 35                | 32.5              | 2.3             | 968    | acetyltransferase                                 |
| Housekeeping        | K04G7.4        | K04G7.4                                                   |                         | III | 2              | 7                          | 3                 | 12.6              | 5              | 38                         | 20                | 32.6              | 5.4             | 436    | isocitrate lyase                                  |
| Housekeeping        | C05G5.4        | C05G5.4                                                   |                         | X   | 2              | 6                          | 6                 | 13.7              | 5              | 34                         | 12                | 28.9              | 5.7             | 322    | NADH dehydrogenase                                |
| Housekeeping        | T10E9.7        | T10E9.7                                                   | <i>nuo-2</i>            | I   | 2              | 7                          | 4                 | 10.2              | 5              | 32                         | 11                | 26.7              | 4.6             | 401    | succinyl-CoA synthetase                           |
| Housekeeping        | Y53G8AL.2      | Y53G8AL.2                                                 |                         | III | 2              | 6                          | 3                 | 9.3               | 5              | 30                         | 14                | 30.2              | 5.0             | 431    | NADH-ubiquinone oxidoreductase                    |
| Housekeeping        | T22D1.4        | T22D1.4                                                   |                         | IV  | 2              | 9                          | 7                 | 17.6              | 5              | 24                         | 6                 | 15                | 2.7             | 608    | kd subunit                                        |
| Housekeeping        | F42G8.12       | F42G8.12                                                  | <i>isp-1</i>            | IV  | 2              | 7                          | 6                 | 33                | 5              | 23                         | 11                | 39.9              | 3.3             | 276    | glycotransferase                                  |
| Housekeeping        | F20H11.3       | F20H11.3                                                  | <i>mdh-1</i>            | III | 5              | 71                         | 30                | 49.6              | 4              | 181                        | 47                | 51.3              | 2.5             | 341    | ubiquinol-cytochrome C reductase                  |
| Housekeeping        | T05G5.6        | T05G5.6                                                   | <i>ech-6</i>            | III | 1              | 23                         | 10                | 45.8              | 4              | 125                        | 18                | 48.6              | 5.4             | 288    | malate dehydrogenase                              |
| Housekeeping        | F53A2.7        | F53A2.7                                                   |                         | III | 3              | 33                         | 14                | 53.3              | 4              | 80                         | 23                | 52.4              | 2.4             | 441    | Enoyl-CoA hydratase                               |
| Housekeeping        | F56D2.1        | F56D2.1                                                   |                         | III | 4              | 13                         | 6                 | 15.3              | 4              | 51                         | 19                | 36.9              | 3.9             | 471    | Thiolasases                                       |
| Housekeeping        | C54G4.8        | C54G4.8                                                   | <i>cyc-1</i>            | V   | 2              | 10                         | 3                 | 18.9              | 4              | 46                         | 13                | 44.6              | 4.6             | 285    | Mitochondrial processing protease                 |
| Housekeeping        | ZC434.8        | ZC434.8                                                   |                         | I   | 1              | 8                          | 4                 | 17.8              | 4              | 34                         | 12                | 29.2              | 4.3             | 360    | enhancing protein                                 |
| Housekeeping        | E04F6.5        | E04F6.5                                                   |                         | II  | 2              | 2                          | 2                 | 5.5               | 4              | 30                         | 14                | 19.9              | 15.0            | 613    | cytochrome C1, heme protein                       |
| Housekeeping        | T21B10.2       | T21B10.2                                                  |                         | II  | 4              | 21                         | 7                 | 33.6              | 4              | 26                         | 8                 | 26                | 1.2             | 434    | arginine kinase (mito)                            |
| Housekeeping        | C33A12.1       | C33A12.1                                                  |                         | IV  | 3              | 3                          | 3                 | 31.3              | 4              | 24                         | 3                 | 31.3              | 8.0             | 150    | Acyl-CoA dehydrogenase                            |
| Housekeeping        | R07E5.2        | R07E5.2                                                   | <i>prdx-3</i>           | III | 1              | 5                          | 5                 | 25.7              | 4              | 22                         | 14                | 31.4              | 4.4             | 226    | enolase                                           |
| Housekeeping        | R11A5.4        | R11A5.4                                                   |                         | I   | 3              | 18                         | 10                | 18.3              | 4              | 21                         | 12                | 24.2              | 1.2             | 654    | NADH-ubiquinone oxidoreductase 13                 |
| Housekeeping        | C07A12.4       | C07A12.4                                                  | <i>pdi-2</i>            | X   | 1              | 7                          | 4                 | 14.2              | 4              | 20                         | 12                | 24.3              | 2.9             | 493    | KD-B subunit                                      |
| Housekeeping        | K02F2.2        | K02F2.2                                                   | <i>dpy-14</i>           | I   | 4              | 37                         | 21                | 40.7              | 4              | 17                         | 8                 | 28.4              | 0.5             | 437    | hydroperoxidase Mer5 (mouse)                      |
| Housekeeping        | F09E5.2        | F09E5.2                                                   |                         | II  | 2              | 9                          | 7                 | 10.4              | 4              | 17                         | 14                | 14.2              | 1.9             | 576    | antioxidant                                       |
| Housekeeping        | R06F6.9        | R06F6.9                                                   | <i>ech-4</i>            | II  | 2              | 2                          | 2                 | 13                | 4              | 17                         | 4                 | 23.1              | 8.5             | 385    | phosphoenolpyruvate carboxykinase                 |
| Housekeeping        | C44B7.10       | C44B7.10                                                  |                         | II  | 2              | 8                          | 3                 | 10.2              | 4              | 15                         | 7                 | 15.6              | 1.9             | 832    | protein disulfide isomerase (mito)                |
| Housekeeping        | T20G5.2        | T20G5.2                                                   | <i>cts-1</i>            | III | 2              | 10                         | 7                 | 19.7              | 4              | 14                         | 10                | 38.7              | 1.4             | 468    | S-adenosylhomocysteine hydrolase                  |
| Housekeeping        | Y69A2AR.18     | Y69A2AR.18                                                |                         | IV  | 2              | 6                          | 4                 | 16.4              | 4              | 10                         | 8                 | 20.7              | 1.7             | 299    | HPC/TSA protein, Glycosyl transferases            |
| Housekeeping        | C04C3.3        | C04C3.3                                                   |                         | IV  | 1              | 3                          | 2                 | 7.7               | 4              | 10                         | 5                 | 33.5              | 3.3             | 352    | enoyl CoA hydratase/isomerase                     |
| Housekeeping        | Y45G12B.1      | Y45G12B.1                                                 |                         | V   | 1              | 7                          | 5                 | 9.7               | 3              | 42                         | 18                | 37.6              | 6.0             | 729    | Acetyl-CoA hydratases                             |
| Housekeeping        | Y46G5A.31      | Y46G5A.31                                                 | <i>gsy-1</i>            | II  | 3              | 3                          | 3                 | 9.7               | 3              | 28                         | 13                | 21.4              | 9.3             | 672    | Citrate synthase (mito)                           |
| Housekeeping        | F32B6.2        | F32B6.2                                                   |                         | IV  | 2              | 11                         | 8                 | 11.9              | 3              | 26                         | 18                | 14.7              | 2.4             | 688    | ATP synthase                                      |
| Housekeeping        | C03G5.1        | C03G5.1                                                   |                         | X   | 3              | 7                          | 5                 | 14.7              | 3              | 22                         | 13                | 22.1              | 3.1             | 646    | pyruvate dehydrogenase                            |
| Housekeeping        | H06O01.1       | H06O01.1                                                  | <i>pdi-3</i>            | I   | 1              | 8                          | 5                 | 9.8               | 3              | 22                         | 5                 | 20.5              | 2.8             | 488    | Respiratory chain (mito)                          |
| Housekeeping        | F47B10.1       | F47B10.1                                                  | <i>scb-1</i>            | X   | 1              | 6                          | 2                 | 4.4               | 3              | 21                         | 8                 | 24.1              | 3.5             | 435    | glycogen synthetase) isoform 1                    |
| Housekeeping        | T22F3.3        | T22F3.3                                                   |                         | V   | 2              | 5                          | 4                 | 6.8               | 3              | 20                         | 11                | 14.1              | 4.0             | 882    | carbamoyl-phosphate carboxylase                   |
| Housekeeping        | W05G11.6       | W05G11.6                                                  |                         | III | 2              | 17                         | 11                | 19.2              | 3              | 20                         | 9                 | 22.6              | 1.2             | 651    | succinate dehydrogenase flavoprotein              |
| Housekeeping        | F54H12.1       | F54H12.1                                                  | <i>aco-2</i>            | III | 2              | 15                         | 8                 | 17.5              | 3              | 17                         | 10                | 21.4              | 1.1             | 777    | Thioredoxins Protein disulphide isomerase         |
| Housekeeping        | F01G4.6        | F01G4.6                                                   |                         | IV  | 1              | 5                          | 4                 | 12.6              | 3              | 17                         | 12                | 25.6              | 3.4             | 340    | isomerase                                         |
| Housekeeping        | C08F11.14      | C08F11.14                                                 |                         | IV  | 3              | 12                         | 8                 | 8.6               | 3              | 16                         | 5                 | 7.4               | 1.3             | 907    | succinate-CoA ligase                              |
| Housekeeping        | C34B2.7        | C34B2.7                                                   |                         | I   | 1              | 3                          | 3                 | 7.7               | 3              | 16                         | 6                 | 10.3              | 5.3             | 640    | Glycogen phosphorylase activity                   |
| Housekeeping        | F22B3.4        | F22B3.4                                                   |                         | IV  | 2              | 3                          | 2                 | 5.8               | 3              | 16                         | 7                 | 15.8              | 5.3             | 710    | glucosamine-fructose-6-phosphate aminotransferase |
| Housekeeping        | F46H5.3        | F46H5.3                                                   |                         | X   | 4              | 29                         | 14                | 48.3              | 3              | 15                         | 8                 | 23.1              | 0.5             | 377    | arginine kinase                                   |
| Housekeeping        | F23C8.5        | F23C8.5                                                   |                         | I   | 2              | 8                          | 3                 | 26.7              | 3              | 15                         | 10                | 43.9              | 1.9             | 255    | electron transfer flavoprotein beta               |
| Housekeeping        | B0403.4        | B0403.4                                                   |                         | X   | 1              | 3                          | 3                 | 12.3              | 3              | 12                         | 7                 | 17.3              | 4.0             | 440    | protein disulfide-isomerase                       |
| Housekeeping        | F27D4.5        | F27D4.5                                                   | <i>tag-173</i>          | I   | 1              | 3                          | 3                 | 15                | 3              | 11                         | 9                 | 33.3              | 3.7             | 366    | 2-oxoisovalerate dehydrogenase (mito)             |
| Housekeeping        | F43G9.1        | F43G9.1                                                   |                         | I   | 1              | 9                          | 4                 | 16.8              | 3              | 11                         | 9                 | 18.2              | 1.2             | 374    | isocitrate dehydrogenase (mito)                   |

| Functional Category | Predicted Gene | Family ID<br>(when peptides identify more than 1 protein) | <i>C. elegans</i> locus | LG  | Oogenic        |                            |                   |                   | Spermatogenic  |                            |                   |                   | Abundance Ratio | Length | Descriptor                                                      |
|---------------------|----------------|-----------------------------------------------------------|-------------------------|-----|----------------|----------------------------|-------------------|-------------------|----------------|----------------------------|-------------------|-------------------|-----------------|--------|-----------------------------------------------------------------|
|                     |                |                                                           |                         |     | Occur-<br>renc | Total<br>Spectrum<br>Count | Sequence<br>Count | Cover-<br>age (%) | Occur-<br>renc | Total<br>Spectrum<br>Count | Sequence<br>Count | Cover-<br>age (%) |                 |        |                                                                 |
|                     |                |                                                           |                         |     |                |                            |                   |                   |                |                            |                   |                   |                 |        |                                                                 |
| Housekeeping        | T05H4.12       | T05H4.12                                                  |                         | V   | 1              | 6                          | 5                 | 17.8              | 3              | 11                         | 7                 | 17.8              | 1.8             | 129    | Mitochondrial ATP synthase coupling factor 6                    |
| Housekeeping        | ZK829.4        | ZK829.4                                                   |                         | IV  | 1              | 6                          | 2                 | 6.3               | 3              | 11                         | 8                 | 17.5              | 1.8             | 536    | glutamate dehydrogenase                                         |
| Housekeeping        | R07G3.5        | R07G3.5                                                   |                         | II  | 1              | 3                          | 3                 | 17.5              | 3              | 10                         | 4                 | 17.5              | 3.3             | 269    | Phosphoglycerate mutase                                         |
| Housekeeping        | T02G5.8        | T02G5.8                                                   | <i>kat-1</i>            | II  | 1              | 8                          | 5                 | 22.1              | 3              | 10                         | 7                 | 19.2              | 1.3             | 407    | acetoacetyl-CoA thiolase (mito)                                 |
| Housekeeping        | C05D11.11      | C05D11.11                                                 | <i>mel-32</i>           | III | 3              | 11                         | 4                 | 10.5              | 3              | 9                          | 6                 | 16.3              | 0.8             | 484    | serine hydroxymethyltransferase                                 |
| Housekeeping        | Y39B6A.20      | Y39B6A.20                                                 | <i>asp-1</i>            | V   | 2              | 8                          | 6                 | 30.8              | 3              | 9                          | 4                 | 22                | 1.1             | 396    | aspartyl protease                                               |
| Housekeeping        | F01G4.2        | F01G4.2                                                   | <i>ard-1</i>            | IV  | 3              | 3                          | 3                 | 22.5              | 3              | 9                          | 5                 | 30.6              | 3.0             | 258    | short-chain alcohol dehydrogenase                               |
| Housekeeping        | F25H5.3        | F25H5.3                                                   |                         | I   | 2              | 9                          | 4                 | 16.2              | 3              | 8                          | 3                 | 11.2              | 0.9             | 562    | Pyruvate kinase, alpha/beta domain                              |
|                     |                |                                                           |                         |     |                |                            |                   |                   |                |                            |                   |                   |                 |        | Beta-ketoacyl synthase, C-terminal                              |
| Housekeeping        | F32H2.5        | F32H2.5                                                   |                         | I   | 2              | 9                          | 6                 | 4.6               | 3              | 8                          | 7                 | 5.5               | 0.9             | 2586   | domain                                                          |
| Housekeeping        | F01G10.1       | F01G10.1                                                  | <i>cct-6</i>            | IV  | 3              | 13                         | 9                 | 9.9               | 3              | 6                          | 5                 | 10.5              | 0.5             | 618    | transketolase                                                   |
| Housekeeping        | K09A9.5        | K09A9.5                                                   | <i>gas-1</i>            | X   | 1              | 3                          | 2                 | 6.8               | 3              | 6                          | 3                 | 13.1              | 2.0             | 482    | NADH-ubiquinone oxidoreductase                                  |
| Housekeeping        | F35G12.2       | F35G12.2                                                  |                         | III | 1              | 3                          | 3                 | 11.1              | 3              | 5                          | 4                 | 19.7              | 1.7             | 380    | Isocitrate dehydrogenase                                        |
| Housekeeping        | K09H11.1       | K09H11.1                                                  |                         | V   | 1              | 2                          | 2                 | 2.3               | 3              | 5                          | 3                 | 6.4               | 2.5             | 985    | Acyl-CoA dehydrogenase                                          |
| Housekeeping        | F27D4.1        | F27D4.1                                                   |                         | I   | 2              | 5                          | 3                 | 14.5              | 3              | 4                          | 4                 | 20.5              | 0.8             | 332    | electron transfer flavoprotein                                  |
| Housekeeping        | K11H3.1        | K11H3.1                                                   |                         | III | 1              | 2                          | 2                 | 9.4               | 3              | 4                          | 4                 | 8.3               | 2.0             | 351    | Glycerol-3-phosphate                                            |
| Housekeeping        | T08H10.1       | T08H10.1                                                  |                         | V   | 1              | 4                          | 3                 | 14.7              | 2              | 15                         | 10                | 25.5              | 3.8             | 333    | aldose reductase                                                |
| Housekeeping        | F23H11.3       | F23H11.3                                                  |                         | III | 1              | 8                          | 5                 | 25.5              | 2              | 14                         | 3                 | 17.1              | 1.8             | 321    | succinyl-CoA ligase                                             |
| Housekeeping        | C06H2.1        | C06H2.1                                                   |                         | V   | 1              | 5                          | 4                 | 28.8              | 2              | 13                         | 7                 | 41.4              | 2.6             | 191    | mitochondrial ATP synthase D chain                              |
| Housekeeping        | F43E2.7        | F43E2.7                                                   |                         | II  | 1              | 5                          | 2                 | 10.2              | 2              | 10                         | 3                 | 18.4              | 2.0             | 342    | mitochondrial substrate carrier                                 |
| Housekeeping        | H14A12.2       | H14A12.2                                                  | <i>fum-1</i>            | III | 2              | 10                         | 8                 | 23                | 2              | 9                          | 5                 | 17.6              | 0.9             | 501    | fumarase (mito)                                                 |
| Housekeeping        | C47D12.6       | C47D12.6                                                  | <i>trs-1</i>            | III | 3              | 18                         | 9                 | 20.1              | 2              | 8                          | 6                 | 10.8              | 0.4             | 725    | t RNA synthetase (mito)                                         |
| Housekeeping        | C05D11.12      | C05D11.12                                                 | <i>let-721</i>          | III | 1              | 5                          | 3                 | 7.4               | 2              | 8                          | 6                 | 18.1              | 1.6             | 597    | electron transfer fibroprotein                                  |
| Housekeeping        | F23B12.5       | F23B12.5                                                  |                         | V   | 1              | 2                          | 2                 | 5.7               | 2              | 8                          | 4                 | 9.9               | 4.0             | 507    | pyruvate dehydrogenase complex                                  |
| Housekeeping        | F57B10.3       | F57B10.3                                                  |                         | I   | 1              | 9                          | 2                 | 7.2               | 2              | 8                          | 4                 | 13.5              | 0.9             | 539    | phosphoglycerate mutase                                         |
| Housekeeping        | F49H12.5       | F49H12.5                                                  |                         | X   | 2              | 7                          | 7                 | 23.7              | 2              | 7                          | 5                 | 19.5              | 1.0             | 257    | thioredoxin, ER targeting sequence                              |
| Housekeeping        | T05D4.1        | T05D4.1                                                   |                         | III | 2              | 2                          | 2                 | 13.4              | 2              | 7                          | 2                 | 12.6              | 3.5             | 365    | Fructose-bisphosphate aldolase                                  |
| Housekeeping        | F27D9.5        | F27D9.5                                                   |                         | X   | 2              | 23                         | 11                | 19.3              | 2              | 6                          | 5                 | 13                | 0.3             | 724    | Propionyl-coA carboxylase                                       |
| Housekeeping        | Y37E3.17       | Y37E3.17                                                  |                         | I   | 2              | 11                         | 7                 | 13                | 2              | 6                          | 4                 | 6.5               | 0.5             | 830    | Glycine cleavage T-protein                                      |
| Housekeeping        | K04D7.3        | K04D7.3                                                   | <i>gta-1</i>            | IV  | 1              | 2                          | 2                 | 7.7               | 2              | 6                          | 4                 | 18.8              | 3.0             | 483    | 4-aminobutyrate aminotransferase                                |
| Housekeeping        | T03F1.3        | T03F1.3                                                   |                         | I   | 1              | 2                          | 2                 | 7.7               | 2              | 5                          | 3                 | 9.6               | 2.5             | 417    | phosphoglycerate kinase                                         |
| Housekeeping        | C14F11.1       | C14F11.1                                                  |                         | X   | 2              | 10                         | 5                 | 16.2              | 2              | 4                          | 4                 | 15                | 0.4             | 414    | Aspartate aminotransferase                                      |
| Housekeeping        | C48B4.1        | C48B4.1                                                   |                         | III | 2              | 7                          | 4                 | 6.7               | 2              | 4                          | 3                 | 7.1               | 0.6             | 659    | Acyl-CoA oxidase I                                              |
| Housekeeping        | F08C6.2        | F08C6.2                                                   |                         | X   | 1              | 3                          | 2                 | 11.8              | 2              | 4                          | 3                 | 16.7              | 1.3             | 347    | cholinephosphate cytidyltransferase                             |
| Housekeeping        | F35D11.4       | F35D11.4                                                  |                         | II  | 1              | 4                          | 2                 | 16.8              | 2              | 4                          | 3                 | 9.1               | 1.0             | 197    | Adenylyl cyclase                                                |
| Housekeeping        | K10B3.7        | K10B3.7/K10B3.8                                           | <i>gpd-3</i>            | X   | 1              | 20                         | 11                | 35.2              | 2              | 4                          | 3                 | 13.5              | 0.2             | 341    | Glyceraldehyde 3-phosphate                                      |
| Housekeeping        | K10B3.8        | K10B3.7/K10B3.8                                           | <i>gpd-2</i>            | X   | 1              | 20                         | 11                | 35.2              | 2              | 4                          | 3                 | 13.5              | 0.2             | 341    | Glyceraldehyde 3-phosphate                                      |
| Housekeeping        | M01A10.3       | M01A10.3                                                  |                         | I   | 1              | 3                          | 2                 | 14.3              | 2              | 4                          | 3                 | 14.3              | 1.3             | 280    | oligosaccharyl transferase                                      |
| Housekeeping        | R07H5.8        | R07H5.8                                                   |                         | IV  | 1              | 3                          | 2                 | 12.3              | 2              | 4                          | 4                 | 24.9              | 1.3             | 342    | adenosine kinase                                                |
| Housekeeping        | T25G12.5       | T25G12.5                                                  |                         | X   | 1              | 5                          | 3                 | 14.3              | 2              | 4                          | 3                 | 12.1              | 0.8             | 412    | acyl-CoA dehydrogenase                                          |
| Housekeeping        | Y39E4A.3       | Y39E4A.3                                                  |                         | III | 1              | 6                          | 5                 | 18.2              | 2              | 3                          | 2                 | 6.9               | 0.5             | 478    | transketolase                                                   |
| Housekeeping        | Y37D8A.14      | Y37D8A.14                                                 |                         | III | 1              | 5                          | 3                 | 23.6              | 1              | 36                         | 11                | 51.1              | 7.2             | 174    | Cytochrome c oxidase subunit Va                                 |
| Housekeeping        | Y71H2AM.5      | Y71H2AM.5                                                 |                         | III | 2              | 2                          | 2                 | 17.4              | 1              | 18                         | 12                | 52.9              | 9.0             | 121    | cytochrome oxidase                                              |
| Housekeeping        | T22B11.5       | T22B11.5                                                  |                         | IV  | 2              | 13                         | 8                 | 13                | 1              | 14                         | 5                 | 8.3               | 1.1             | 1029   | 2-oxoglutarate dehydrogenase                                    |
| Housekeeping        | F38B2.4        | F38B2.4                                                   |                         | X   | 2              | 2                          | 2                 | 20                | 1              | 12                         | 4                 | 19.5              | 6.0             | 210    | adenylyl kinase                                                 |
| Housekeeping        | E04A4.7        | E04A4.7                                                   |                         | IV  | 2              | 4                          | 2                 | 19.8              | 1              | 7                          | 4                 | 33.3              | 1.8             | 111    | cytochrome C                                                    |
| Housekeeping        | Y57G11C.3      | Y57G11C.3                                                 |                         | IV  | 1              | 3                          | 2                 | 15.2              | 1              | 6                          | 4                 | 24.2              | 2.0             | 269    | phosphate isomerase                                             |
| Housekeeping        | C37E2.1        | C37E2.1                                                   |                         | X   | 1              | 3                          | 2                 | 6.6               | 1              | 5                          | 2                 | 9.2               | 1.7             | 379    | isocitrate dehydrogenase                                        |
| Housekeeping        | F46E10.9       | F46E10.9                                                  | <i>dpy-11</i>           | V   | 2              | 3                          | 2                 | 11.4              | 1              | 5                          | 3                 | 16.7              | 1.7             | 246    | thioredoxin                                                     |
| Housekeeping        | W07E11.1       | W07E11.1                                                  |                         | X   | 1              | 3                          | 3                 | 2.3               | 1              | 4                          | 3                 | 1.6               | 1.3             | 2207   | glutamate synthase                                              |
| Housekeeping        | T08G2.3        | T08G2.3                                                   |                         | X   | 1              | 12                         | 4                 | 13.7              | 1              | 3                          | 2                 | 6.7               | 0.3             | 417    | acyl-CoA dehydrogenase                                          |
| Housekeeping        | T26C12.1       | T26C12.1                                                  |                         | IV  | 1              | 2                          | 2                 | 4.7               | 1              | 2                          | 2                 | 6.6               | 1.0             | 640    | acetolactate synthase                                           |
| Housekeeping        | Y57A10A.26     | Y57A10A.26                                                |                         | II  | 1              | 3                          | 3                 | 15.2              | 1              | 2                          | 2                 | 11.5              | 0.7             | 269    | Glutathione S-transferase, C-terminal                           |
| Housekeeping        | R07H5.2        | R07H5.2                                                   |                         | IV  | 2              | 2                          | 2                 | 4.5               | 1              | 2                          | 2                 | 4                 | 1.0             | 646    | camitine palmitoyltransferase II                                |
| Cytoskeletal        | F11C3.3        | F11C3.3                                                   | <i>unc-54</i>           | I   | 5              | 268                        | 98                | 38.2              | 6              | 382                        | 129               | 35.6              | 1.4             | 1963   | Myosin heavy chain                                              |
| Cytoskeletal        | F07A5.7        | F07A5.7                                                   | <i>unc-15</i>           | I   | 5              | 185                        | 61                | 45.3              | 6              | 178                        | 64                | 42.9              | 1.0             | 872    | paramyosin                                                      |
| Cytoskeletal        | M03F4.2        | M03F4.2                                                   | <i>act-4</i>            | X   | 5              | 212                        | 46                | 61.7              | 6              | 91                         | 21                | 42.3              | 0.4             | 376    | Actin                                                           |
| Cytoskeletal        | T04C12.4       | T04C12.4                                                  | <i>act-3</i>            | V   | 5              | 210                        | 45                | 61.2              | 6              | 90                         | 21                | 42.3              | 0.4             | 376    | Actin                                                           |
| Cytoskeletal        | T04C12.6       | T04C12.6                                                  | <i>act-1</i>            | V   | 5              | 210                        | 45                | 61.2              | 6              | 90                         | 21                | 42.3              | 0.4             | 376    | Actin                                                           |
| Cytoskeletal        | T25C8.2        | T25C8.2                                                   | <i>act-5</i>            | II  | 5              | 72                         | 23                | 61.1              | 6              | 78                         | 22                | 42.4              | 1.1             | 375    | Actin                                                           |
| Cytoskeletal        | T04C12.5       | T04C12.5                                                  | <i>act-2</i>            | V   | 5              | 178                        | 41                | 61.7              | 6              | 69                         | 19                | 42.3              | 0.4             | 376    | Actin                                                           |
| Cytoskeletal        | R06C7.10       | R06C7.10                                                  | <i>myo-1 let-75</i>     | I   | 5              | 52                         | 31                | 17.5              | 6              | 67                         | 35                | 14.5              | 1.3             | 1938   | Myosin heavy chain                                              |
| Cytoskeletal        | F10C1.2        | F10C1.2                                                   | <i>itb-1</i>            | II  | 4              | 43                         | 13                | 26                | 6              | 41                         | 11                | 15.9              | 1.0             | 558    | Intermediate filament protein                                   |
| Cytoskeletal        | F10C1.7        | F10C1.7                                                   | <i>itb-2</i>            | II  | 5              | 156                        | 41                | 50.1              | 5              | 627                        | 108               | 67                | 4.0             | 543    | Intermediate filament protein                                   |
| Cytoskeletal        | ZK973.6        | ZK973.6                                                   | <i>anc-1</i>            | I   | 4              | 181                        | 17                | 33                | 5              | 308                        | 29                | 5.4               | 1.7             | 7659   | actin binding, nuclear localization                             |
| Cytoskeletal        | M6.1           | M6.1                                                      | <i>itc-2</i>            | X   | 3              | 19                         | 10                | 11.7              | 5              | 210                        | 52                | 23.8              | 11.1            | 1141   | Intermediate filament protein                                   |
| Cytoskeletal        | K10B3.10       | K10B3.10                                                  | <i>spc-1</i>            | X   | 3              | 25                         | 18                | 12.4              | 5              | 47                         | 32                | 19.8              | 1.9             | 2427   | spectrin alpha chain                                            |
| Cytoskeletal        | C43C3.1        | C43C3.1                                                   | <i>tlp-1</i>            | X   | 3              | 17                         | 10                | 16.8              | 5              | 45                         | 23                | 31.7              | 2.6             | 776    | Intermediate filament protein                                   |
| Cytoskeletal        | T18D3.4        | T18D3.4                                                   | <i>myo-2</i>            | X   | 4              | 42                         | 21                | 14.5              | 5              | 42                         | 23                | 11.7              | 1.0             | 1969   | Myosin heavy chain                                              |
| Cytoskeletal        | K11C4.3        | K11C4.3                                                   | <i>unc-70</i>           | V   | 4              | 10                         | 5                 | 4.2               | 5              | 25                         | 5                 | 12.4              | 3.5             | 2287   | spectrin beta chain                                             |
| Cytoskeletal        | ZC101.2        | ZC101.2                                                   | <i>unc-52</i>           | II  | 4              | 87                         | 48                | 25.8              | 5              | 20                         | 17                | 8.8               | 0.2             | 2482   | laminin, Ig domains                                             |
| Cytoskeletal        | F09F7.2        | F09F7.2                                                   | <i>mlc-3</i>            | III | 3              | 49                         | 18                | 66.7              | 4              | 39                         | 15                | 59.5              | 0.8             | 153    | myosin light chain                                              |
| Cytoskeletal        | K12F2.1        | K12F2.1                                                   | <i>myo-3</i>            | V   | 4              | 56                         | 36                | 22.7              | 4              | 29                         | 20                | 12.6              | 0.5             | 1992   | Myosin heavy chain                                              |
| Cytoskeletal        | C38E6.3        | C38E6.3                                                   | <i>mlc-1</i>            | X   | 1              | 20                         | 8                 | 33.7              | 4              | 24                         | 8                 | 30.4              | 1.2             | 270    | EF hand, Calcium binding                                        |
| Cytoskeletal        | R31.1          | R31.1                                                     | <i>sma-1</i>            | V   | 2              | 9                          | 7                 | 2.5               | 4              | 11                         | 9                 | 3.3               | 1.2             | 4063   | spectrin beta chain                                             |
| Cytoskeletal        | R07G3.3        | R07G3.3                                                   |                         | II  | 2              | 5                          | 4                 | 3.7               | 4              | 8                          | 5                 | 3.7               | 1.6             | 1976   | Myosin heavy chain                                              |
| Cytoskeletal        | C36E6.5        | C36E6.5                                                   | <i>mlc-2</i>            | X   | 2              | 22                         | 9                 | 53.5              | 3              | 19                         | 9                 | 48.2              | 0.9             | 170    | Myosin Light Chain gene class cytoplasmic intermediate filament |
| Cytoskeletal        | R04E5.10       | R04E5.10                                                  | <i>itd-1</i>            | X   | 1              | 8                          | 5                 | 15                | 3              | 18                         | 12                | 26.6              | 2.3             | 575    | protein                                                         |
| Cytoskeletal        | C46G7.2        | C46G7.2                                                   |                         | IV  | 3              | 13                         | 9                 | 42                | 3              | 15                         | 5                 | 34.4              | 1.2             | 250    | Alpha-filagenin, muscle protein                                 |
| Cytoskeletal        | C25A11.4       | C25A11.4                                                  | <i>ajm-1</i>            | X   | 2              | 19                         | 6                 | 7.3               | 3              | 9                          | 4                 | 4.1               | 0.5             | 1480   | apical junction molecular                                       |
| Cytoskeletal        | C47E8.7        | C47E8.7                                                   | <i>unc-112</i>          | V   | 1              | 11                         | 8                 | 15.4              | 3              | 4                          | 3                 |                   |                 |        |                                                                 |

| Functional Category  | Predicted Gene | Family ID (when peptides identify more than 1 protein) | <i>C. elegans</i> locus | LG  | Oogenic        |                            |                   |                   | Spermatogenic  |                            |                   |                   | Abundance Ratio | Length | Descriptor                                                      |
|----------------------|----------------|--------------------------------------------------------|-------------------------|-----|----------------|----------------------------|-------------------|-------------------|----------------|----------------------------|-------------------|-------------------|-----------------|--------|-----------------------------------------------------------------|
|                      |                |                                                        |                         |     | Occur-<br>renc | Total<br>Spectrum<br>Count | Sequence<br>Count | Cover-<br>age (%) | Occur-<br>renc | Total<br>Spectrum<br>Count | Sequence<br>Count | Cover-<br>age (%) |                 |        |                                                                 |
|                      |                |                                                        |                         |     |                |                            |                   |                   |                |                            |                   |                   |                 |        |                                                                 |
| Signalling           | B0205.7        | B0205.7                                                | <i>kin-3</i>            | I   | 2              | 8                          | 5                 | 18.6              | 5              | 25                         | 12                | 28.6              | 3.1             | 360    | casein kinase                                                   |
| Signalling           | F56C9.1        | F56C9.1                                                | <i>gsp-2</i>            | III | 2              | 7                          | 4                 | 20.4              | 5              | 21                         | 13                | 40.8              | 3.0             | 333    | Glc Seven-like Phosphatases                                     |
| Signalling           | F29F11.6       | F29F11.6                                               | <i>gsp-1</i>            | V   | 2              | 5                          | 4                 | 21.9              | 4              | 16                         | 9                 | 41                | 3.2             | 329    | Glc Seven-like Phosphatases                                     |
| Signalling           | F52D10.3       | F52D10.3                                               | <i>ftt-2</i>            | X   | 2              | 15                         | 9                 | 30.6              | 4              | 15                         | 3                 | 16.5              | 1.0             | 248    | 14-3-3 protein                                                  |
| Signalling           | K04D7.1        | K04D7.1                                                |                         | IV  | 3              | 20                         | 9                 | 41.2              | 3              | 27                         | 10                | 38.2              | 1.4             | 325    | G-protein WD-40 repeat protein kinase and KH domain-RNA binding |
| Signalling           | E02D9.1        | E02D9.1                                                |                         | I   | 2              | 11                         | 6                 | 21.6              | 3              | 16                         | 8                 | 21.6              | 1.5             | 315    |                                                                 |
| Signalling           | C25F6.2        | C25F6.2                                                | <i>dlg-1</i>            | X   | 5              | 40                         | 26                | 31.2              | 3              | 11                         | 11                | 19.2              | 0.3             | 1064   | guanylate kinase, adherens junctions                            |
| Signalling           | F48E8.5        | F48E8.5                                                | <i>paa-1</i>            | III | 1              | 14                         | 8                 | 19.7              | 3              | 9                          | 5                 | 7.7               | 0.6             | 664    | protein phosphatase 2A, HEAT repeat                             |
| Signalling           | F49D11.1       | F49D11.1                                               |                         | I   | 1              | 2                          | 2                 | 6.2               | 3              | 9                          | 3                 | 8.8               | 4.5             | 567    | WD domain G-beta protein                                        |
| Signalling           | Y76A2B.1       | Y76A2B.1                                               | <i>pod-1</i>            | III | 1              | 4                          | 3                 | 6.9               | 2              | 7                          | 3                 | 7.8               | 1.8             | 1057   | WD domain G-beta protein                                        |
| Major Sperm          | F33D11.11      | F33D11.11                                              |                         | I   | 1              | 5                          | 4                 | 29.8              | 3              | 4                          | 3                 | 25.7              | 0.8             | 245    | Major Sperm Protein                                             |
| Major Sperm          | C09B9.6        | MSP                                                    | <i>msp-55</i>           | IV  | 2              | 3                          | 2                 | 23.6              | 1              | 3                          | 2                 | 22                | 1.0             | 127    | Major Sperm Protein                                             |
| Major Sperm          | C33F10.9       | MSP                                                    | <i>msp-40</i>           | II  | 2              | 3                          | 2                 | 23.6              | 1              | 3                          | 2                 | 22                | 1.0             | 127    | Major Sperm Protein                                             |
| Major Sperm          | C34F11.4       | MSP                                                    | <i>msp-50</i>           | III | 2              | 3                          | 2                 | 23.6              | 1              | 3                          | 2                 | 22                | 1.0             | 127    | Major Sperm Protein                                             |
| Major Sperm          | C34F11.6       | MSP                                                    | <i>msp-49</i>           | II  | 2              | 3                          | 2                 | 23.6              | 1              | 3                          | 2                 | 22                | 1.0             | 127    | Major Sperm Protein                                             |
| Major Sperm          | F32B6.6        | MSP                                                    | <i>msp-77</i>           | IV  | 2              | 3                          | 2                 | 23.6              | 1              | 3                          | 2                 | 22                | 1.0             | 127    | Major Sperm Protein                                             |
| Major Sperm          | F36H12.7       | MSP                                                    | <i>msp-19</i>           | IV  | 2              | 3                          | 2                 | 23.6              | 1              | 3                          | 2                 | 22                | 1.0             | 127    | Major Sperm Protein                                             |
| Major Sperm          | F58A6.8        | MSP                                                    | <i>msp-45</i>           | II  | 2              | 3                          | 2                 | 23.6              | 1              | 3                          | 2                 | 22                | 1.0             | 127    | Major Sperm Protein                                             |
| Major Sperm          | K05F1.2        | MSP                                                    | <i>msp-142</i>          | II  | 2              | 3                          | 2                 | 23.6              | 1              | 3                          | 2                 | 22                | 1.0             | 127    | Major Sperm Protein                                             |
| Major Sperm          | K07F5.1        | MSP                                                    | <i>msp-81</i>           | IV  | 1              | 3                          | 2                 | 23.6              | 1              | 3                          | 2                 | 22                | 1.0             | 127    | Major Sperm Protein                                             |
| Major Sperm          | R05F9.13       | MSP                                                    | <i>msp-31</i>           | II  | 2              | 3                          | 2                 | 23.6              | 1              | 3                          | 2                 | 22                | 1.0             | 127    | Major Sperm Protein                                             |
| Major Sperm          | R05F9.8        | MSP                                                    | <i>msp-37</i>           | II  | 2              | 3                          | 2                 | 23.6              | 1              | 3                          | 2                 | 22                | 1.0             | 127    | Major Sperm Protein                                             |
| Major Sperm          | R13H9.2        | MSP                                                    | <i>msp-57</i>           | IV  | 2              | 3                          | 2                 | 23.6              | 1              | 3                          | 2                 | 22                | 1.0             | 127    | Major Sperm Protein                                             |
| Major Sperm          | R13H9.4        | MSP                                                    | <i>msp-53</i>           | IV  | 2              | 3                          | 2                 | 23.6              | 1              | 3                          | 2                 | 22                | 1.0             | 127    | Major Sperm Protein                                             |
| Major Sperm          | T13F2.10       | MSP                                                    | <i>msp-79</i>           | IV  | 2              | 3                          | 2                 | 23.1              | 1              | 3                          | 2                 | 21.5              | 1.0             | 130    | Major Sperm Protein                                             |
| Major Sperm          | Y59E9AR.1      | MSP                                                    |                         | IV  | 2              | 3                          | 2                 | 23.1              | 1              | 3                          | 2                 | 21.5              | 1.0             | 130    | Major Sperm Protein                                             |
| Extracellular Matrix | K08C7.3        | K08C7.3                                                | <i>epi-1</i>            | IV  | 1              | 13                         | 11                | 5.3               | 5              | 60                         | 40                | 14.8              | 4.6             | 3704   | Laminin                                                         |
| Extracellular Matrix | W09H1.6        | W09H1.6                                                | <i>lec-1</i>            | II  | 4              | 13                         | 7                 | 33.7              | 5              | 26                         | 10                | 38                | 2.0             | 279    | Lectin                                                          |
| Extracellular Matrix | F52H3.7        | F52H3.7                                                |                         | II  | 5              | 38                         | 15                | 9                 | 5              | 25                         | 9                 | 22.3              | 0.7             | 278    | galactoside-binding lectin                                      |
| Extracellular Matrix | F52H3.7        | F52H3.7                                                |                         | II  | 5              | 38                         | 15                | 9                 | 5              | 25                         | 9                 | 22.3              | 0.7             | 278    | galactoside-binding lectin                                      |
| Extracellular Matrix | C54D1.5        | C54D1.5                                                |                         | X   | 2              | 11                         | 8                 | 9.1               | 5              | 24                         | 14                | 13                | 2.2             | 1557   | laminin EGF-like                                                |
| Extracellular Matrix | W03F8.5        | W03F8.5                                                | <i>lam-1</i>            | IV  | 4              | 16                         | 9                 | 9.2               | 4              | 32                         | 25                | 18.9              | 2.0             | 1808   | Laminin                                                         |
| Extracellular Matrix | Y55B1AR.1      | Y55B1AR.1                                              |                         | III | 1              | 3                          | 3                 | 37.7              | 4              | 28                         | 10                | 56.2              | 9.3             | 146    | Lectin                                                          |
| Extracellular Matrix | F40F4.6        | F40F4.6                                                |                         | X   | 2              | 6                          | 3                 | 2.8               | 3              | 23                         | 12                | 9.2               | 3.8             | 2214   | EGF-like repeats, Lectin                                        |
| Extracellular Matrix | ZK892.1        | ZK892.1                                                | <i>lec-3</i>            | II  | 3              | 8                          | 3                 | 20.5              | 3              | 6                          | 4                 | 16.8              | 0.8             | 297    | galactoside-binding lectin                                      |
| Extracellular Matrix | C16H3.2        | C16H3.2                                                | <i>lec-9</i>            | X   | 1              | 5                          | 3                 | 37.1              | 2              | 5                          | 3                 | 42.1              | 1.0             | 140    | sugar-binding protein                                           |
| Extracellular Matrix | W03F11.1       | W03F11.1                                               |                         | I   | 1              | 4                          | 2                 | 12.3              | 2              | 4                          | 4                 | 16.2              | 1.0             | 235    | chitin binding                                                  |
| Extracellular Matrix | H19M22.2       | H19M22.2                                               | <i>let-805</i>          | III | 3              | 66                         | 43                | 16.4              | 2              | 3                          | 3                 | 1.4               | 0.0             | 4280   | let-805 Putative cell adhesion protein                          |
| Extracellular Matrix | H0212.1        | H0212.1                                                |                         | IV  | 5              | 31                         | 11                | 12.5              | 1              | 4                          | 3                 | 4.6               | 0.1             | 1332   | chitin binding Protein                                          |
| Spindle              | K01G5.7        | K01G5.7                                                | <i>tbb-1</i>            | III | 5              | 94                         | 35                | 53.7              | 6              | 122                        | 42                | 52.1              | 1.3             | 449    | tubulin beta-chain                                              |
| Spindle              | C54C6.2        | C54C6.2                                                | <i>ben-1</i>            | III | 5              | 46                         | 20                | 29.9              | 6              | 68                         | 24                | 34.1              | 1.5             | 452    | tubulin                                                         |
| Spindle              | C47B2.3        | C47B2.3                                                | <i>tba-2</i>            | I   | 4              | 46                         | 13                | 33.9              | 6              | 44                         | 18                | 33.3              | 1.0             | 448    | alpha tubulin                                                   |
| Spindle              | F26E4.8        | F26E4.8                                                | <i>tba-1</i>            | I   | 4              | 39                         | 12                | 30.7              | 6              | 38                         | 18                | 33.2              | 1.0             | 449    | TBA-2 tubulin alpha-2 chain                                     |
| Spindle              | F44F4.11       | F44F4.11                                               | <i>tba-4</i>            | II  | 4              | 31                         | 9                 | 24.1              | 6              | 30                         | 15                | 26.6              | 1.0             | 448    | tubulin alpha-2 chain                                           |
| Spindle              | T28D6.2        | T28D6.2                                                | <i>tba-7</i>            | III | 3              | 25                         | 7                 | 15.8              | 5              | 25                         | 11                | 16                | 1.0             | 444    | tubulin alpha subunit                                           |
| Spindle              | B0272.1        | B0272.1                                                | <i>tbb-4</i>            | X   | 2              | 21                         | 12                | 25.9              | 5              | 18                         | 11                | 21.4              | 0.9             | 444    | tubulin beta                                                    |
| Spindle              | ZK154.3        | ZK154.3                                                | <i>mec-7</i>            | X   | 3              | 13                         | 6                 | 12.9              | 3              | 14                         | 7                 | 20.2              | 1.1             | 441    | beta tubulin                                                    |
| Spindle              | C41C4.8        | C41C4.8                                                |                         | II  | 2              | 13                         | 9                 | 15.1              | 3              | 12                         | 5                 | 10.7              | 0.9             | 810    | P97 protein AAA ATPases                                         |
| Spindle              | F58A4.8        | F58A4.8                                                | <i>tbg-1</i>            | III | 2              | 2                          | 2                 | 4.1               | 1              | 7                          | 5                 | 23.2              | 3.5             | 444    | Gamma-like tubulin                                              |
| Spindle              | C44B11.3       | C44B11.3                                               | <i>mec-12</i>           | III | 2              | 6                          | 2                 | 8.4               | 1              | 2                          | 2                 | 4.4               | 0.3             | 450    | alpha tubulin                                                   |
| Heat Shock           | F01F1.8        | F01F1.8                                                | <i>cct-6</i>            | III | 1              | 5                          | 2                 | 7.1               | 3              | 8                          | 5                 | 17.3              | 1.6             | 539    | eukaryotic cytosolic chaperonin                                 |
| Heat Shock           | C37H5.8        | C37H5.8                                                | <i>hsp-6</i>            | V   | 2              | 14                         | 7                 | 13.2              | 3              | 4                          | 4                 | 9.7               | 0.3             | 657    | Heat shock 70 protein                                           |
| Heat Shock           | K01C8.10       | K01C8.10                                               | <i>cct-4</i>            | II  | 3              | 17                         | 8                 | 22.2              | 2              | 25                         | 6                 | 24.6              | 1.5             | 540    | chaperonin                                                      |
| Heat Shock           | T05C12.7       | T05C12.7                                               | <i>cct-1</i>            | II  | 1              | 4                          | 2                 | 7.5               | 2              | 22                         | 6                 | 10.7              | 5.5             | 549    | chaperonin                                                      |
| Heat Shock           | T27E4.3        | T27E4.3                                                | <i>hsp-16.48</i>        | V   | 2              | 18                         | 4                 | 54.5              | 2              | 11                         | 4                 | 44.8              | 0.6             | 143    | heat shock protein                                              |
| Heat Shock           | T27E4.9        | T27E4.9                                                | <i>hsp-16.49</i>        | V   | 2              | 18                         | 4                 | 54.5              | 2              | 11                         | 4                 | 44.8              | 0.6             | 143    | heat shock protein                                              |
| Heat Shock           | T05C3.5        | T05C3.5                                                | <i>djri-19</i>          | V   | 2              | 2                          | 2                 | 6.8               | 2              | 10                         | 6                 | 10.7              | 5.0             | 439    | DNAJ-like protein                                               |
| Heat Shock           | C24G6.5        | C24G6.5                                                | <i>djri-6</i>           | V   | 2              | 2                          | 2                 | 9                 | 2              | 7                          | 5                 | 8.3               | 3.5             | 374    | DNAJ                                                            |
| Heat Shock           | T27E4.2        | hsp-16                                                 | <i>hsp-16.1</i>         | V   | 2              | 18                         | 8                 | 37.9              | 2              | 3                          | 3                 | 26.2              | 0.2             | 145    | heat shock protein HSP16-1                                      |
| Heat Shock           | T27E4.8        | hsp-16                                                 | <i>hsp-16.1</i>         | V   | 2              | 18                         | 8                 | 37.9              | 2              | 3                          | 3                 | 26.2              | 0.2             | 145    | heat shock protein HSP16-1                                      |
| Heat Shock           | Y46H3A.3       | hsp-16                                                 | <i>hsp-16.2</i>         | V   | 2              | 17                         | 7                 | 33.8              | 2              | 3                          | 3                 | 26.2              | 0.2             | 145    | heat shock protein                                              |
| Heat Shock           | C14F11.5       | C14F11.5                                               | <i>hsp-43</i>           | X   | 1              | 4                          | 3                 | 12.2              | 2              | 3                          | 3                 | 13.3              | 0.8             | 368    | Hsp20 or alpha crystallin family                                |
| Heat Shock           | F54D5.8        | F54D5.8                                                | <i>djri-13</i>          | II  | 1              | 4                          | 2                 | 9.7               | 2              | 3                          | 2                 | 6.9               | 0.8             | 331    | DNAJ                                                            |
| Heat Shock           | C07G2.3        | C07G2.3                                                | <i>cct-5</i>            | III | 1              | 2                          | 2                 | 5                 | 1              | 3                          | 3                 | 10.9              | 1.5             | 542    | TCP-1 like chaperonin                                           |
| Heat Shock           | F54A3.3        | F54A3.3                                                |                         | X   | 1              | 6                          | 4                 | 8.4               | 1              | 2                          | 2                 | 4.6               | 0.3             | 606    | Chaperonin                                                      |
| Vitellogenin         | C42D8.2        | C42D8.2                                                | <i>vit-2</i>            | X   | 5              | 301                        | 94                | 45.6              | 6              | 117                        | 47                | 28.6              | 0.4             | 1613   | Vitellogenin                                                    |
| Vitellogenin         | K07H8.6        | K07H8.6                                                | <i>vit-6</i>            | IV  | 4              | 273                        | 86                | 45.5              | 6              | 69                         | 42                | 30.7              | 0.3             | 1650   | Vitellogenin                                                    |
| Vitellogenin         | K09F5.2        | K09F5.2                                                | <i>vit-1</i>            | X   | 4              | 153                        | 54                | 25.6              | 5              | 58                         | 22                | 14.1              | 0.4             | 1616   | Vitellogenin                                                    |
| Vitellogenin         | C04F6.1        | C04F6.1                                                | <i>vit-5</i>            | X   | 3              | 83                         | 41                | 28.6              | 4              | 24                         | 11                | 12                | 0.3             | 1603   | Vitellogenin                                                    |
| Vitellogenin         | F59D8.1        | F59D8.1                                                | <i>vit-3</i>            | X   | 3              | 52                         | 31                | 22.9              | 3              | 13                         | 7                 | 7.5               | 0.3             | 1603   | Vitellogenin                                                    |
| Vitellogenin         | F59D8.2        | F59D8.2                                                | <i>vit-4</i>            | X   | 3              | 55                         | 31                | 22.7              | 3              | 12                         | 6                 | 6.7               | 0.2             | 1603   | Vitellogenin                                                    |
| Nuclear Envelope     | DY3.2          | DY3.2                                                  | <i>lmn-1</i>            | I   | 4              | 51                         | 25                | 41.5              | 6              | 139                        | 61                | 51.6              | 2.7             | 566    | nuclear laminin                                                 |
| Nuclear Envelope     | T23H2.1        | T23H2.1                                                | <i>npp-12</i>           | I   | 3              | 12                         | 8                 | 7                 | 5              | 41                         | 20                | 15.5              | 3.4             | 1847   | integral membrane protein                                       |
| Nuclear Envelope     | C01G8.5        | C01G8.5                                                | <i>erm-1</i>            | I   | 3              | 9                          | 6                 | 8.3               | 4              | 26                         | 11                | 20.1              | 2.9             | 563    | membrane protein, ERM family of                                 |
| Nuclear Envelope     | F59A2.1        | F59A2.1                                                | <i>npp-9</i>            | III | 2              | 18                         | 10                | 22.1              | 3              | 13                         | 7                 | 14.8              | 0.7             | 860    | Nucleoporin                                                     |
| Nuclear Envelope     | Y37E3.15       | Y37E3.15                                               | <i>npp-14</i>           | I   | 2              | 10                         | 7                 | 8.5               | 3              | 13                         | 10                | 17.2              | 1.3             | 787    | Nucleoporin interacting component                               |
| Nuclear Envelope     | W01G7.5        | W01G7.5                                                | <i>lem-2</i>            | II  | 3              | 11                         | 7                 | 22.6              | 3              | 7                          | 4                 | 16.6              | 0.6             | 500    | nuclear membrane (LEM domain, lamino associated)                |
| Nuclear Envelope     | ZK328.5        | ZK328.5                                                | <i>npp-10</i>           | II  | 1              | 3                          | 3                 | 3.6               | 3              | 3                          | 3                 | 6.7               | 1.0             | 955    | NUCLEOPORIN                                                     |
| Nuclear Envelope     | F54B11.3       | F54B11.3                                               | <i>unc-84</i>           | X   | 1              | 8                          | 3                 | 5.1               | 2              | 5                          | 3                 | 4.9               | 0.6             | 1111   | nuclear migration, nuclear envelope                             |
| Nuclear Envelope     | F26B1.3        | F26B1.3                                                | <i>ima-2</i>            | I   | 1              | 6                          | 3                 | 8.9               | 2              | 4                          | 3                 | 10.9              | 0.7             | 531    | importin                                                        |
| Nuclear Envelope     |                |                                                        |                         |     |                |                            |                   |                   |                |                            |                   |                   |                 |        |                                                                 |

| Functional Category | Predicted Gene | Family ID<br>(when peptides identify more than 1 protein) | <i>C. elegans</i> locus | LG  | Oogenic        |                            |                   |                   | Spermatogenic  |                            |                   |                   | Abundance Ratio | Length | Descriptor                                                                          |
|---------------------|----------------|-----------------------------------------------------------|-------------------------|-----|----------------|----------------------------|-------------------|-------------------|----------------|----------------------------|-------------------|-------------------|-----------------|--------|-------------------------------------------------------------------------------------|
|                     |                |                                                           |                         |     | Occur-<br>renc | Total<br>Spectrum<br>Count | Sequence<br>Count | Cover-<br>age (%) | Occur-<br>renc | Total<br>Spectrum<br>Count | Sequence<br>Count | Cover-<br>age (%) |                 |        |                                                                                     |
|                     |                |                                                           |                         |     |                |                            |                   |                   |                |                            |                   |                   |                 |        |                                                                                     |
| Other               | B0350.2        | B0350.2                                                   | <i>unc-44</i>           | I   | 2              | 6                          | 4                 | 3.2               | 5              | 12                         | 10                | 7.1               | 2.0             | 2039   | ankryrin-like                                                                       |
| Other               | Y38A10A.5      | Y38A10A.5                                                 | <i>cr1-1</i>            | V   | 2              | 11                         | 5                 | 23                | 4              | 35                         | 11                | 48.4              | 3.2             | 395    | calreticulin precursor                                                              |
| Other               | T20G5.1        | T20G5.1                                                   |                         | III | 2              | 27                         | 20                | 17.7              | 4              | 26                         | 15                | 13.6              | 1.0             | 1681   | Claithrin heavy chain                                                               |
| Other               | F27C1.7        | F27C1.7                                                   |                         | I   | 2              | 7                          | 6                 | 25.6              | 4              | 22                         | 12                | 33.8              | 3.1             | 207    | ATPase (mito)                                                                       |
| Other               | F20B6.2        | F20B6.2                                                   | <i>vha-12</i>           | X   | 2              | 13                         | 8                 | 24.6              | 4              | 20                         | 9                 | 18.9              | 1.5             | 491    | vacuolar ATP synthase                                                               |
| Other               | C06A1.1        | C06A1.1                                                   |                         | II  | 2              | 15                         | 11                | 19.8              | 4              | 10                         | 5                 | 13.5              | 0.7             | 809    | AAA ATPase                                                                          |
| Other               | VW02B12L.1     | VW02B12L.1                                                | <i>vha-6</i>            | II  | 1              | 4                          | 3                 | 7.6               | 3              | 31                         | 16                | 12.7              | 7.8             | 865    | vacuolar ATP synthase                                                               |
| Other               | T26E3.7        | T26E3.7                                                   |                         | I   | 1              | 8                          | 2                 | 10.4              | 3              | 28                         | 7                 | 10.4              | 3.5             | 106    | ATP synthase alpha and beta                                                         |
| Other               | C30F8.2        | C30F8.2                                                   |                         | I   | 1              | 5                          | 3                 | 14.9              | 3              | 22                         | 10                | 39.7              | 4.4             | 348    | vacuolar ATPase                                                                     |
| Other               | C14B1.1        | C14B1.1                                                   | <i>pdi-1</i>            | III | 1              | 7                          | 4                 | 12.4              | 3              | 19                         | 7                 | 14                | 2.7             | 485    | protein disulfide isomerase                                                         |
| Other               | T27E9.7        | T27E9.7                                                   |                         | III | 1              | 3                          | 3                 | 9.2               | 3              | 13                         | 9                 | 12.7              | 4.3             | 622    | ABC transporters (2 domains)                                                        |
| Other               | Y25C1A.5       | Y25C1A.5                                                  |                         | II  | 2              | 9                          | 5                 | 9.8               | 3              | 12                         | 4                 | 8                 | 1.3             | 971    | beta subunit of the coatomer (COPI)<br>19S regulatory particlesubunit of proteasome |
| Other               | T22D1.9        | T22D1.9                                                   | <i>rpn-1</i>            | IV  | 2              | 9                          | 6                 | 9.8               | 3              | 10                         | 5                 | 7.6               | 1.1             | 981    | WD domain, COPI complex component                                                   |
| Other               | F38E11.5       | F38E11.5                                                  |                         | IV  | 1              | 5                          | 4                 | 9.1               | 3              | 10                         | 6                 | 10.8              | 2.0             | 1000   | ATPase Proteasome component                                                         |
| Other               | F56H1.4        | F56H1.4                                                   | <i>rpt-5</i>            | I   | 2              | 4                          | 4                 | 14.4              | 3              | 9                          | 6                 | 21.4              | 2.3             | 430    | protein transport protein SEC61 alpha                                               |
| Other               | Y57G11C.15     | Y57G11C.15                                                |                         | IV  | 1              | 4                          | 2                 | 4.2               | 3              | 6                          | 6                 | 4.2               | 1.5             | 473    | ATPase                                                                              |
| Other               | C17H12.14      | C17H12.14                                                 | <i>vha-8</i>            | IV  | 1              | 2                          | 2                 | 6.2               | 3              | 4                          | 4                 | 16.4              | 2.0             | 226    | ATPases associated with various cellular activities (AAA)                           |
| Other               | F54B3.3        | F54B3.3                                                   |                         | II  | 1              | 5                          | 4                 | 5.9               | 2              | 15                         | 8                 | 17.9              | 3.0             | 610    | EF hand, calcium binding                                                            |
| Other               | W06H8.1        | W06H8.1                                                   | <i>rme-1</i>            | V   | 2              | 8                          | 6                 | 10.1              | 2              | 11                         | 4                 | 8.4               | 1.4             | 786    | sec23/24, gelsolin                                                                  |
| Other               | Y113G7A.3      | Y113G7A.3                                                 | <i>sec-23</i>           | V   | 2              | 2                          | 2                 | 5.4               | 2              | 10                         | 7                 | 13.4              | 5.0             | 821    | ABC transporter                                                                     |
| Other               | T10H9.5        | T10H9.5                                                   | <i>pmp-5</i>            | V   | 2              | 3                          | 2                 | 8                 | 2              | 6                          | 4                 | 11.4              | 2.0             | 598    | E1-E2 ATPases                                                                       |
| Other               | K11D9.2        | K11D9.2                                                   | <i>sca-1</i>            | V   | 2              | 9                          | 7                 | 11.3              | 2              | 5                          | 3                 | 4.5               | 0.6             | 1059   | ATP synthase                                                                        |
| Other               | F58F12.1       | F58F12.1                                                  |                         | II  | 1              | 3                          | 3                 | 39.3              | 2              | 5                          | 4                 | 22.1              | 1.7             | 163    | 26S protease regulatory subunit                                                     |
| Other               | F56F11.4       | F56F11.4                                                  |                         | III | 2              | 7                          | 6                 | 13.6              | 2              | 3                          | 3                 | 8.3               | 0.4             | 411    | ATPases associated with various cellular activities (AAA)                           |
| Other               | Y49E10.1       | Y49E10.1                                                  | <i>rpt-6</i>            | III | 2              | 6                          | 5                 | 9.1               | 2              | 3                          | 3                 | 8.2               | 0.5             | 416    | ubiquitin                                                                           |
| Other               | F25B5.4        | F25B5.4                                                   | <i>ubq-1</i>            | III | 1              | 22                         | 1                 | 1.1               | 1              | 22                         | 1                 | 1.1               | 1.0             | 838    | Vacuolar H ATPase gene class                                                        |
| Other               | Y38F2AL.3      | Y38F2AL.3                                                 | <i>vha-11</i>           | IV  | 2              | 6                          | 3                 | 6.8               | 1              | 5                          | 2                 | 6.8               | 0.8             | 384    | Adaptor complexes medium subunit                                                    |
| Other               | C13B9.3        | C13B9.3                                                   |                         | III | 2              | 2                          | 2                 | 4.9               | 1              | 5                          | 4                 | 14.8              | 2.5             | 515    | vacuolar ATPase G subunit                                                           |
| Other               | F46F11.5       | F46F11.5                                                  |                         | I   | 2              | 2                          | 2                 | 15.9              | 1              | 4                          | 3                 | 15.9              | 2.0             | 126    | Dynamin                                                                             |
| Other               | C02C6.1        | C02C6.1                                                   | <i>dyn-1</i>            | X   | 1              | 2                          | 2                 | 4.1               | 1              | 2                          | 2                 | 2.3               | 1.0             | 830    | Membrane-associated atpase gamma                                                    |
| Other               | F55H2.2        | F55H2.2                                                   |                         | III | 1              | 3                          | 3                 | 12.5              | 1              | 2                          | 2                 | 12.5              | 0.7             | 257    | proteasome component                                                                |
| Other               | R12E2.3        | R12E2.3                                                   | <i>rpn-8</i>            | I   | 1              | 3                          | 3                 | 14.9              | 1              | 2                          | 2                 | 11                | 0.7             | 362    | ATPase subunit                                                                      |
| Other               | T14F9.1        | T14F9.1                                                   | <i>vha-15</i>           | X   | 1              | 5                          | 5                 | 9.1               | 2              | 7                          | 5                 | 9.1               | 1.4             | 470    |                                                                                     |
| Unknown             | M01E11.4       | M01E11.4                                                  | <i>pqn-52</i>           | I   | 4              | 25                         | 15                | 34.8              | 6              | 65                         | 26                | 46.7              | 2.6             | 244    |                                                                                     |
| Unknown             | F29G6.3        | F29G6.3                                                   |                         | X   | 3              | 17                         | 11                | 7.2               | 5              | 72                         | 46                | 23.3              | 4.2             | 1929   |                                                                                     |
| Unknown             | Y56A3A.21      | Y56A3A.21                                                 |                         | III | 2              | 6                          | 5                 | 32.1              | 5              | 14                         | 8                 | 22.6              | 2.3             | 159    |                                                                                     |
| Unknown             | Y66H1B.2       | Y66H1B.2                                                  |                         | IV  | 2              | 8                          | 5                 | 4.3               | 4              | 36                         | 30                | 19.1              | 4.5             | 1400   |                                                                                     |
| Unknown             | W08E3.3        | W08E3.3                                                   | <i>tag-210</i>          | I   | 3              | 39                         | 19                | 46.1              | 4              | 28                         | 13                | 33.7              | 0.7             | 395    | GTP-binding protein like                                                            |
| Unknown             | C08H9.2        | C08H9.2                                                   |                         | II  | 1              | 9                          | 9                 | 8.8               | 4              | 24                         | 14                | 14.1              | 2.7             | 1220   | high-density lipoprotein-binding                                                    |
| Unknown             | C18B2.5        | C18B2.5                                                   |                         | X   | 1              | 6                          | 5                 | 10.5              | 4              | 24                         | 13                | 26.6              | 4.0             | 673    |                                                                                     |
| Unknown             | VW06B3R.1      | VW06B3R.1                                                 |                         | X   | 2              | 6                          | 3                 | 14.9              | 4              | 23                         | 9                 | 30.7              | 3.8             | 410    | Insulinase                                                                          |
| Unknown             | D1054.10       | D1054.10                                                  |                         | V   | 5              | 78                         | 15                | 40.4              | 4              | 20                         | 7                 | 28.7              | 0.3             | 188    |                                                                                     |
| Unknown             | Y39B6A.1       | Y39B6A.1                                                  |                         | V   | 1              | 3                          | 3                 | 1.5               | 4              | 19                         | 12                | 5.2               | 6.3             | 735    |                                                                                     |
| Unknown             | Y59A8A.3       | Y59A8A.3                                                  |                         | V   | 2              | 18                         | 8                 | 20.9              | 4              | 13                         | 3                 | 9.2               | 0.7             | 676    |                                                                                     |
| Unknown             | D1054.11       | D1054.11                                                  |                         | V   | 5              | 97                         | 18                | 28.7              | 4              | 10                         | 5                 | 19.9              | 0.1             | 317    |                                                                                     |
| Unknown             | T05F1.6        | T05F1.6                                                   | <i>hsr-9</i>            | V   | 2              | 14                         | 11                | 14.9              | 4              | 10                         | 4                 | 7                 | 0.7             | 1151   | BRCA1 C Terminus (BRCT) domain                                                      |
| Unknown             | F54F11.2       | F54F11.2                                                  |                         | II  | 2              | 14                         | 8                 | 10.4              | 3              | 23                         | 12                | 15.6              | 1.6             | 1589   | Zinc-binding metalloprotease                                                        |
| Unknown             | Y65B4BR.5      | Y65B4BR.5                                                 |                         | I   | 1              | 10                         | 4                 | 24.1              | 3              | 23                         | 6                 | 23.6              | 2.3             | 195    | Ubiquitin associated domain, NAC                                                    |
| Unknown             | T14G11.3       | T14G11.3                                                  |                         | X   | 3              | 9                          | 4                 | 8                 | 3              | 22                         | 11                | 20.6              | 2.4             | 727    |                                                                                     |
| Unknown             | F42C5.10       | F42C5.10                                                  |                         | IV  | 2              | 3                          | 2                 | 3.8               | 3              | 20                         | 14                | 19.7              | 6.7             | 1292   |                                                                                     |
| Unknown             | F57F4.3        | F57F4.3/F57F4.4                                           | <i>gfi-1</i>            | V   | 1              | 6                          | 3                 | 3.8               | 3              | 18                         | 7                 | 6.6               | 3.0             | 2153   | ET domain (cys residues of unk fxn)                                                 |
| Unknown             | F57F4.4        | F57F4.3/F57F4.4                                           |                         | V   | 1              | 6                          | 3                 | 3.9               | 3              | 18                         | 7                 | 6.8               | 3.0             | 2090   | ET domain (cys residues of unk fxn)                                                 |
| Unknown             | ZC373.2        | ZC373.2                                                   |                         | X   | 5              | 47                         | 8                 | 37.7              | 3              | 17                         | 4                 | 36.9              | 0.4             | 122    |                                                                                     |
| Unknown             | C44B12.5       | C44B12.5                                                  |                         | IV  | 3              | 45                         | 12                | 29.2              | 3              | 17                         | 6                 | 20.4              | 0.4             | 397    |                                                                                     |
| Unknown             | F37C4.5        | F37C4.5                                                   |                         | IV  | 1              | 2                          | 2                 | 5                 | 3              | 10                         | 6                 | 14.2              | 5.0             | 556    |                                                                                     |
| Unknown             | F30A10.5       | F30A10.5                                                  | <i>stl-1</i>            | I   | 1              | 3                          | 2                 | 10.8              | 3              | 7                          | 4                 | 24.6              | 2.3             | 334    | erythrocyte band 7 integral                                                         |
| Unknown             | C02E11.1       | C02E11.1                                                  |                         | V   | 1              | 5                          | 3                 | 5.6               | 2              | 9                          | 5                 | 8.1               | 1.8             | 1121   |                                                                                     |
| Unknown             | B0238.11       | B0238.11                                                  |                         | V   | 1              | 4                          | 3                 | 17.4              | 2              | 8                          | 6                 | 32.5              | 2.0             | 317    |                                                                                     |
| Unknown             | Y71G10AL.1     | Y71G10AL.1                                                |                         | IV  | 2              | 4                          | 3                 | 12.7              | 2              | 7                          | 4                 | 18.9              | 1.8             | 408    |                                                                                     |
| Unknown             | ZK180.4        | ZK180.4                                                   |                         | IV  | 1              | 3                          | 2                 | 22.2              | 2              | 7                          | 3                 | 29.5              | 2.3             | 193    | GTP binding                                                                         |
| Unknown             | F12F6.1        | F12F6.1                                                   |                         | IV  | 3              | 3                          | 3                 | 7.2               | 2              | 5                          | 3                 | 5.6               | 1.7             | 903    |                                                                                     |
| Unknown             | Y80D3A.2       | Y80D3A.2                                                  |                         | V   | 1              | 3                          | 3                 | 4                 | 2              | 3                          | 3                 | 3.8               | 1.0             | 1212   |                                                                                     |
| Unknown             | C08F11.12      | C08F11.12                                                 |                         | IV  | 1              | 7                          | 4                 | 53.8              | 1              | 6                          | 2                 | 15.4              | 0.9             | 117    |                                                                                     |
| Unknown             | Y45F10C.2      | Y45F10C.2                                                 |                         | IV  | 1              | 6                          | 3                 | 35                | 1              | 6                          | 2                 | 15.4              | 1.0             | 117    |                                                                                     |
| Unknown             | JC8.8          | JC8.8                                                     |                         | IV  | 1              | 2                          | 2                 | 22.6              | 1              | 6                          | 3                 | 27                | 3.0             | 159    | Transthyretin-like                                                                  |
| Unknown             | C47E12.5       | C47E12.5                                                  | <i>uba-1</i>            | IV  | 2              | 12                         | 8                 | 12.4              | 1              | 4                          | 3                 | 5                 | 0.3             | 1113   | ubiquitin-activating enzyme                                                         |
| Unknown             | W03F9.10       | W03F9.10                                                  |                         | V   | 2              | 2                          | 2                 | 5.1               | 1              | 4                          | 4                 | 5.5               | 2.0             | 602    |                                                                                     |
| Unknown             | F02A9.2        | F02A9.2                                                   | <i>far-1</i>            | III | 1              | 3                          | 3                 | 20.9              | 1              | 2                          | 2                 | 9.9               | 0.7             | 182    | (fatty acid binding protein)                                                        |
| Unknown             | F28B4.3        | F28B4.3                                                   |                         | X   | 1              | 4                          | 3                 | 2.6               | 1              | 2                          | 2                 | 2.2               | 0.5             | 2229   | EGF-like repeat                                                                     |
| Unknown             | Y57G11C.24     | Y57G11C.24                                                | <i>eps-8</i>            | IV  | 2              | 2                          | 2                 | 4.1               | 1              | 2                          | 2                 | 5.5               | 1.0             | 732    | epidermal growth factor receptor                                                    |
| Unknown             | Y71H2AM.4      | Y71H2AM.4                                                 |                         | III | 1              | 2                          | 2                 | 18                | 1              | 6                          | 3                 | 24.5              | 3.0             | 139    |                                                                                     |

Functional Category determination is described in Supplemental Methods; Family ID, designation for families of proteins not differentiated by a set of identifying peptides; LG, chromosomal location; Occurrences, the number of preparations in which a protein was identified out of 6 spermatogenic or 5 oogenic preparations; Total Spectrum Count (TSC), the total number of peptides detected for each protein from all preparations; Sequence Count, the number of distinct MS/MS spectra collected from all preparations; Coverage, % of protein represented by uniquely identified peptides; Abundance Ratio, calculated from Spermatogenic TSC/Oogenic TSC; Length, number of amino acids in protein; Descriptor, protein description through homology or provided in WormBase, Worm Protein Database (BIOBASE) annotations.

Supplemental Table 4 Oogenic proteins copurified with chromatin (272)

| Functional Category | Predicted Gene | Family ID (when peptides identify more than 1 protein) | C. elegans locus | LG  | Abundance  |                      | Sequence Count | Coverage (%) | Length | Descriptor                                                      |
|---------------------|----------------|--------------------------------------------------------|------------------|-----|------------|----------------------|----------------|--------------|--------|-----------------------------------------------------------------|
|                     |                |                                                        |                  |     | Occurrence | Total Spectrum Count |                |              |        |                                                                 |
| DNA                 | C50B6.2        | C50B6.2                                                |                  | V   | 2          | 36                   | 19             | 30.4         | 582    | Histone binding protein                                         |
| DNA                 | F26F12.7       | F26F12.7                                               | <i>let-418</i>   | V   | 2          | 13                   | 13             | 9.2          | 1829   | DNA helicase                                                    |
| DNA                 | Y39G10AR.14    | Y39G10AR.14                                            | <i>mcm-4</i>     | I   | 2          | 9                    | 6              | 13.5         | 823    | DNA replication                                                 |
| DNA                 | C25D7.6        | C25D7.6                                                | <i>mcm-3</i>     | V   | 2          | 7                    | 5              | 9.4          | 812    | DNA replication licensing factor MCM3                           |
| DNA                 | Y113G7B.23     | Y113G7B.23                                             | <i>psa-1</i>     | V   | 2          | 7                    | 5              | 12.3         | 789    | SWI/SNF protein                                                 |
| DNA                 | ZK1127.7       | ZK1127.7                                               |                  | II  | 2          | 7                    | 6              | 8.5          | 816    | DNA gyrase/topoisomerase IV, subunit A                          |
| DNA                 | F37D6.2        | F37D6.2                                                |                  | I   | 2          | 7                    | 2              | 7.4          | 582    | C2H2 type zinc finger domain                                    |
| DNA                 | F09G2.9        | F09G2.9                                                |                  | V   | 2          | 6                    | 5              | 17.6         | 415    | DNA binding Domain (A+T hook)                                   |
| DNA                 | R07E5.3        | R07E5.3                                                |                  | III | 2          | 4                    | 3              | 17.8         | 381    | Snf5                                                            |
| DNA                 | C54G10.2       | C54G10.2                                               | <i>rtc-1</i>     | III | 2          | 3                    | 2              | 3.5          | 839    | Replication factor C1                                           |
| DNA                 | F57C7.1        | F57C7.1                                                |                  | X   | 2          | 3                    | 2              | 3.4          | 1250   | Bromodomain                                                     |
| DNA                 | C03G6.12       | C03G6.12                                               |                  | V   | 2          | 2                    | 2              | 7.4          | 430    | ligand-binding domain of nuclear hormone receptor family        |
| DNA                 | C36B1.3        | C36B1.3                                                |                  | I   | 2          | 2                    | 2              | 7.5          | 402    | DNA directed RNA polymerase II                                  |
| DNA                 | F44B9.8        | F44B9.8                                                |                  | III | 2          | 2                    | 2              | 7            | 388    | DNA replication factor C complex                                |
| DNA                 | T04H1.4        | T04H1.4                                                | <i>rad-50</i>    | V   | 2          | 2                    | 2              | 2.9          | 1298   | Recombination/repair protein Rad50                              |
| DNA                 | Y48E1B.12      | Y48E1B.12                                              | <i>csc-1</i>     | II  | 2          | 2                    | 2              | 9.6          | 249    | borealin, Aurora B kinase complex member                        |
| DNA                 | Y71H2AM.17     | Y71H2AM.17                                             |                  | III | 2          | 2                    | 2              | 14.3         | 350    | HMG (high mobility group)                                       |
| DNA                 | T19D12.4       | T19D12.4                                               |                  | II  | 1          | 12                   | 4              | 3.3          | 1028   | bromodomain                                                     |
| DNA                 | F32D1.10       | F32D1.10                                               | <i>mcm-7</i>     | V   | 1          | 7                    | 6              | 9.7          | 730    | cell division control                                           |
| DNA                 | R10E4.4        | R10E4.4                                                | <i>mcm-5</i>     | III | 1          | 7                    | 6              | 10.7         | 759    | MCM protein                                                     |
| DNA                 | Y17G7B.5       | Y17G7B.5                                               | <i>mcm-2</i>     | II  | 1          | 7                    | 4              | 5.6          | 881    | AAA ATPase MCM protein (DNA replication initiation)             |
| DNA                 | C01H6.7        | C01H6.7                                                |                  | I   | 1          | 5                    | 2              | 7.1          | 636    | Bromodomain                                                     |
| DNA                 | F22F1.1        | F22F1.1                                                | <i>hil-3</i>     | X   | 1          | 5                    | 3              | 9.6          | 208    | Histone h1                                                      |
| DNA                 | M04B2.1        | M04B2.1                                                | <i>mep-1</i>     | IV  | 1          | 5                    | 4              | 8.1          | 853    | Zinc finger                                                     |
| DNA                 | T27C4.4        | T27C4.4                                                | <i>egr-1</i>     | V   | 1          | 5                    | 4              | 6.9          | 1022   | Bromo, Myb, Zn finger                                           |
| DNA                 | C08B11.3       | C08B11.3                                               |                  | II  | 1          | 4                    | 3              | 4.2          | 1244   | Zinc finger, C2H2                                               |
| DNA                 | F53H1.4        | F53H1.4/Y51H4A.12                                      |                  | IV  | 1          | 4                    | 3              | 3.6          | 1378   | PHD finger, Zn finger like                                      |
| DNA                 | Y51H4A.12      | F53H1.4/Y51H4A.12                                      |                  | IV  | 1          | 3                    | 3              | 3            | 1645   | PHD finger, SET domain                                          |
| DNA                 | C38D4.3        | C38D4.3                                                |                  | III | 1          | 3                    | 2              | 2.4          | 1695   | AT-hook motif                                                   |
| DNA                 | F15E6.1        | F15E6.1                                                |                  | IV  | 1          | 3                    | 3              | 3            | 1655   | PHD finger, SET domain                                          |
| DNA                 | R01H10.1       | R01H10.1                                               | <i>div-1</i>     | III | 1          | 3                    | 2              | 5.3          | 581    | DNA polymerase alpha associated                                 |
| DNA                 | R06F6.1        | R06F6.1                                                | <i>cdl-1</i>     | II  | 1          | 3                    | 2              | 10.6         | 367    | histone RNA processing protein                                  |
| DNA                 | ZK632.1        | ZK632.1                                                | <i>mcm-6</i>     | III | 1          | 3                    | 3              | 5.2          | 810    | MCM                                                             |
| DNA                 | C09G9.6        | C09G9.6                                                | <i>oma-1</i>     | IV  | 1          | 2                    | 2              | 10.6         | 407    | Zinc finger protein                                             |
| DNA                 | F36A4.14       | F36A4.14                                               | <i>nhr-78</i>    | IV  | 1          | 2                    | 2              | 7.8          | 387    | zinc finger, nuclear hormone receptor                           |
| DNA                 | F56F3.1        | F56F3.1                                                | <i>pqn-45</i>    | III | 1          | 2                    | 2              | 5            | 761    | txn factor homology                                             |
| DNA                 | Y37D8A.9       | Y37D8A.9                                               | <i>mrg-1</i>     | III | 1          | 2                    | 2              | 9.6          | 335    | chromodomain                                                    |
| DNA                 | Y39A1B.3       | Y39A1B.3                                               | <i>dpy-28</i>    | III | 1          | 2                    | 2              | 2.7          | 1260   | non SMC condensin subunit                                       |
| DNA                 | Y47G6A.11      | Y47G6A.11                                              | <i>msh-6</i>     | I   | 1          | 2                    | 2              | 3.4          | 1186   | DNA mismatch repair protein                                     |
| DNA                 | ZK1055.1       | ZK1055.1                                               | <i>hcp-1</i>     | V   | 1          | 2                    | 2              | 1.4          | 1475   | centromere protein (CENP)-F homolog                             |
| DNA                 | F58A4.3        | F58A4.3                                                | <i>hcp-3</i>     | III | 2          | 3                    | 2              | 9            | 288    | Centromeric histone-H3-like protein                             |
| DNA                 | F20D12.4       | F20D12.4                                               | <i>czw-1</i>     | IV  | 1          | 3                    | 2              | 4.6          | 778    | Centromere kinetochore Zwi10                                    |
| RNA                 | F58B3.5        | F58B3.5                                                | <i>mrs-1</i>     | IV  | 3          | 13                   | 6              | 10.1         | 917    | methionyl-tRNA synthetase                                       |
| RNA                 | Y87G2A.5       | Y87G2A.5                                               | <i>vrs-2</i>     | I   | 3          | 11                   | 7              | 8.4          | 1050   | class I family of aminoacyl-tRNA synthetases                    |
| RNA                 | F26F4.10       | F26F4.10                                               | <i>rrt-1</i>     | III | 3          | 10                   | 7              | 15.1         | 713    | arginyl tRNA synthetase                                         |
| RNA                 | R74.1          | R74.1                                                  | <i>lrs-1</i>     | III | 2          | 20                   | 15             | 22.6         | 1186   | leucyl-tRNA synthetase                                          |
| RNA                 | T05H4.6        | T05H4.6                                                |                  | V   | 2          | 9                    | 5              | 16.3         | 443    | eukaryotic peptide chain release factor subunit 1               |
| RNA                 | R11A8.6        | R11A8.6                                                | <i>irs-1</i>     | IV  | 2          | 7                    | 6              | 8.5          | 1141   | isoleucyl-tRNA synthetase                                       |
| RNA                 | T28D9.10       | T28D9.10                                               | <i>snr-3</i>     | II  | 2          | 6                    | 2              | 15.9         | 126    | Putative core component of the spliceosome                      |
| RNA                 | R10E4.2        | R10E4.2                                                |                  | III | 2          | 4                    | 2              | 8.7          | 357    | RNA recognition motifs                                          |
| RNA                 | F18E2.2        | F18E2.2                                                |                  | V   | 2          | 3                    | 2              | 6.8          | 622    | ABC transporter domains-ribosome                                |
| RNA                 | ZK1098.8       | ZK1098.8                                               | <i>mut-7</i>     | III | 2          | 3                    | 2              | 2.5          | 910    | Putative ribonuclease D (RNase D)                               |
| RNA                 | C28H8.3        | C28H8.3                                                |                  | III | 2          | 2                    | 2              | 2.3          | 1714   | DEAD/DEAH box helicase domain                                   |
| RNA                 | K02F2.3        | K02F2.3                                                |                  | I   | 2          | 2                    | 2              | 2.4          | 1220   | CPSF A subunit region splicing factor                           |
| RNA                 | M88.5          | M88.5                                                  |                  | III | 2          | 2                    | 2              | 4.1          | 820    | KH domain, RNA binding                                          |
| RNA                 | Y55F3AM.3      | Y55F3AM.3                                              |                  | IV  | 2          | 2                    | 2              | 7.1          | 580    | RNA recognition motifs                                          |
| RNA                 | C18G1.4        | C18G1.4                                                | <i>pgl-3</i>     | V   | 1          | 7                    | 4              | 8.7          | 693    | RNA helix DEAD box                                              |
| RNA                 | Y39G10AR.8     | Y39G10AR.8                                             |                  | I   | 1          | 6                    | 3              | 9.6          | 469    | elongation factor                                               |
| RNA                 | T07D3.7        | T07D3.7                                                | <i>alg-2</i>     | II  | 1          | 5                    | 3              | 5.2          | 891    | RNA interference                                                |
| RNA                 | C23G10.4       | C23G10.4                                               | <i>rpn-2</i>     | III | 1          | 4                    | 3              | 6.9          | 950    | proteasome/cyclosome, tRNA processing                           |
| RNA                 | M110.4         | M110.4                                                 | <i>itg-1</i>     | II  | 1          | 4                    | 2              | 2.7          | 1156   | initiation factor G                                             |
| RNA                 | Y48B6A.2       | Y48B6A.2                                               | <i>rpl-43</i>    | II  | 1          | 4                    | 2              | 9.9          | 91     | ribosomal                                                       |
| RNA                 | C04F12.1       | C04F12.1                                               |                  | I   | 1          | 3                    | 2              | 3.7          | 944    | Piwi                                                            |
| RNA                 | H19N07.1       | H19N07.1                                               |                  | V   | 1          | 3                    | 3              | 9.1          | 573    | elongation factor                                               |
| RNA                 | Y49E10.15      | Y49E10.15                                              | <i>snr-6</i>     | III | 1          | 3                    | 3              | 41.1         | 90     | Putative core component of the spliceosome                      |
| RNA                 | R08D7.3        | R08D7.3                                                | <i>elf-3.D</i>   | III | 1          | 2                    | 2              | 6.5          | 570    | euk translation initiation                                      |
| RNA                 | Y38C9A.2       | Y38C9A.2                                               | <i>cgp-1</i>     | V   | 1          | 2                    | 2              | 5.7          | 613    | elongation factor                                               |
| Housekeeping        | F01F1.12       | F01F1.12                                               |                  | III | 3          | 15                   | 7              | 35.2         | 366    | fructose-biphosphate aldolase                                   |
| Housekeeping        | K10D2.6        | K10D2.6                                                |                  | III | 3          | 3                    | 3              | 7.1          | 662    | NADP-cytochrome P450 reductase family                           |
| Housekeeping        | C07D8.6        | C07D8.6                                                |                  | X   | 2          | 17                   | 9              | 42.9         | 317    | Aldehyde reductase                                              |
| Housekeeping        | F49E12.1       | F49E12.1                                               |                  | II  | 2          | 12                   | 10             | 15           | 655    | peroxidase                                                      |
| Housekeeping        | C04F6.3        | C04F6.3                                                | <i>cht-1</i>     | X   | 2          | 11                   | 4              | 9.4          | 617    | glycosyl hydrolase (family 18)                                  |
| Housekeeping        | F33H1.2        | F33H1.2/T09F3.3                                        | <i>gpd-4</i>     | II  | 2          | 11                   | 6              | 18.8         | 341    | glyceraldehyde 3-phosphate dehydrogenase 4                      |
| Housekeeping        | T09F3.3        | F33H1.2/T09F3.3                                        | <i>gpd-1</i>     | II  | 2          | 11                   | 6              | 18.8         | 341    | glyceraldehyde 3-phosphate dehydrogenase 1                      |
| Housekeeping        | D2085.1        | D2085.1                                                |                  | II  | 2          | 6                    | 4              | 2.3          | 2198   | glutamine-dependent carbamoyl-phosphate synthase                |
| Housekeeping        | T23G5.1        | T23G5.1                                                | <i>rrr-1</i>     | III | 2          | 5                    | 4              | 10.4         | 788    | Ribonucleoside-disphosphate reductase large chain               |
| Housekeeping        | B0334.3        | B0334.3                                                |                  | II  | 2          | 4                    | 2              | 6            | 634    | Thiamine pyrophosphate enzyme, central domain                   |
| Housekeeping        | C47D12.1       | C47D12.1                                               | <i>trr-1</i>     | II  | 2          | 2                    | 2              | 0.7          | 3944   | Phosphatidylinositol 3- and 4-kinase; FAT domain; FATC domain   |
| Housekeeping        | F52D1.1        | F52D1.1                                                |                  | X   | 2          | 2                    | 2              | 4.5          | 941    | Glycosyl hydrolases family 31                                   |
| Housekeeping        | Y47D3B.10      | Y47D3B.10                                              | <i>phy-1</i>     | III | 2          | 2                    | 2              | 6.1          | 559    | 2OG-Fe(II) oxygenase superfamily                                |
| Housekeeping        | Y75B12B.2      | Y75B12B.2                                              | <i>cyp-7</i>     | V   | 1          | 9                    | 6              | 57.9         | 171    | Peptidyl-prolyl cis-trans isomerases                            |
| Housekeeping        | F52E4.1        | F52E4.1                                                |                  | X   | 1          | 6                    | 6              | 22.4         | 536    | Carboxyl transferase domain                                     |
| Housekeeping        | T17E9.2        | T17E9.2                                                |                  | III | 1          | 6                    | 2              | 7.6          | 450    | Myristoyl-CoA:protein N-myristoyltransferase, N-terminal domain |
| Housekeeping        | K08E3.5        | K08E3.5                                                |                  | III | 1          | 5                    | 4              | 13.8         | 509    | UTP--glucose-1-phosphate uridylyltransferase                    |
| Housekeeping        | R05H5.3        | R05H5.3                                                |                  | II  | 1          | 5                    | 4              | 40.3         | 149    | thioredoxin                                                     |
| Housekeeping        | C36A4.4        | C36A4.4                                                |                  | III | 1          | 4                    | 3              | 14.3         | 484    | UTP-glucose-1-phosphate uridylyltransferase family              |
| Housekeeping        | K06A5.6        | K06A5.6                                                |                  | I   | 1          | 4                    | 3              | 14.6         | 419    | acyl-coA dehydrogenase                                          |
| Housekeeping        | Y119D3B.15     | Y119D3B.15                                             |                  | III | 1          | 4                    | 2              | 34.9         | 126    | DSS/SEM1                                                        |
| Housekeeping        | ZK909.3        | ZK909.3                                                |                  | I   | 1          | 4                    | 2              | 17           | 229    | guanosine-3',5'-bis(diphosphate)-pyrophosphohydrolase           |
| Housekeeping        | F21D5.1        | F21D5.1                                                |                  | IV  | 1          | 3                    | 3              | 9.6          | 550    | phosphoacetylglucosamine mutase                                 |
| Housekeeping        | F35H10.4       | F35H10.4                                               | <i>vha-5</i>     | IV  | 1          | 3                    | 3              | 9.3          | 873    | hydrogen ion transport                                          |
| Housekeeping        | H24K24.3       | H24K24.3                                               |                  | V   | 1          | 3                    | 2              | 6.5          | 384    | alcohol dehydrogenase                                           |
| Housekeeping        | K05F1.3        | K05F1.3                                                |                  | II  | 1          | 3                    | 2              | 7            | 412    | acyl-caA dehydrogenase                                          |
| Housekeeping        | M02D8.4        | M02D8.4                                                |                  | X   | 1          | 3                    | 2              | 6.3          | 567    | asparagine synthase                                             |
| Housekeeping        | R05F9.6        | R05F9.6                                                |                  | II  | 1          | 3                    | 3              | 13           | 568    | phosphoglucosyltransferase                                      |
| Housekeeping        | Y49A3A.5       | Y49A3A.5                                               | <i>cyp-1</i>     | V   | 1          | 3                    | 3              | 19.8         | 192    | Peptidyl-prolyl cis-trans isomerase                             |
| Housekeeping        | Y75B12B.5      | Y75B12B.5                                              | <i>cyp-3</i>     | V   | 1          | 3                    | 3              | 35.3         | 173    | Peptidyl-prolyl cis-trans isomerases                            |
| Housekeeping        | ZK1058.1       | ZK1058.1                                               |                  | III | 1          | 3                    | 3              | 7.4          | 744    | Methylmalonyl-coA mutase                                        |
| Housekeeping        | C14B9.2        | C14B9.2                                                |                  | III | 1          | 2                    | 2              | 3.1          | 618    | thioredoxin (mito)                                              |

| Functional Category  | Predicted Gene | Family ID (when peptides identify more than 1 protein) | C. elegans locus  | LG  | Abundance  |                      | Sequence Count | Coverage (%) | Length | Descriptor                                                      |
|----------------------|----------------|--------------------------------------------------------|-------------------|-----|------------|----------------------|----------------|--------------|--------|-----------------------------------------------------------------|
|                      |                |                                                        |                   |     | Occurrence | Total Spectrum Count |                |              |        |                                                                 |
| Housekeeping         | C32F10.8       | C32F10.8                                               |                   | I   | 1          | 2                    | 2              | 5.8          | 554    | alanine aminotransferase                                        |
| Housekeeping         | F59B8.2        | F59B8.2                                                |                   | IV  | 1          | 2                    | 2              | 6.6          | 412    | isocitrate dehydrogenase                                        |
| Housekeeping         | K04G7.3        | K04G7.3                                                | <i>oat-1</i>      | III | 1          | 2                    | 2              | 4            | 1151   | O-linked N-acetylglucosamine (O-GlcNAc) transferase (nuclear)   |
| Housekeeping         | F07A11.2       | F07A11.2                                               |                   | II  | 1          | 2                    | 2              | 5.1          | 725    | glucosamine-fructose-6-phosphate                                |
| Cytoskeletal         | Y105E8A.6      | Y105E8A.6                                              | <i>unc-95</i>     | I   | 2          | 10                   | 3              | 14.8         | 364    | LIM domain                                                      |
| Cytoskeletal         | Y105E8B.1      | Y105E8B.1                                              | <i>av-11 tmy-</i> | I   | 2          | 10                   | 7              | 23.6         | 284    | tropomyosin, an actin-binding contractile structural protein    |
| Cytoskeletal         | B0272.5        | B0272.5                                                |                   | X   | 2          | 9                    | 7              | 9            | 1973   | endothelial actin-binding protein repeats                       |
| Cytoskeletal         | T17H7.4        | T17H7.4                                                |                   | III | 2          | 7                    | 4              | 10.9         | 663    | may function in morphogenesis of the hypodermis                 |
| Cytoskeletal         | C46A5.9        | C46A5.9                                                | <i>hcf-1</i>      | IV  | 2          | 6                    | 4              | 10.4         | 782    | kelch motif                                                     |
| Cytoskeletal         | Y71G12B.11     | Y71G12B.11                                             |                   | I   | 1          | 9                    | 6              | 5.2          | 2553   | ILWEG (binds actin), Band 4.1 cytoskeletal                      |
| Cytoskeletal         | F58B3.9        | F58B3.9                                                |                   | IV  | 1          | 5                    | 5              | 22.1         | 213    | Transferrin-like                                                |
| Cytoskeletal         | F21C10.7       | F21C10.7                                               |                   | V   | 1          | 4                    | 4              | 4.2          | 2541   | Spectrin repeat, IG like                                        |
| Cytoskeletal         | H27M09.4       | H27M09.4                                               | <i>col-59</i>     | I   | 1          | 4                    | 3              | 8.1          | 322    | collagen                                                        |
| Cytoskeletal         | T05A10.3       | T05A10.3                                               |                   | X   | 1          | 4                    | 3              | 9.1          | 406    | Transferrin-like                                                |
| Cytoskeletal         | C36A4.5        | C36A4.5                                                |                   | III | 1          | 3                    | 3              | 4.4          | 954    | claustrin I                                                     |
| Cytoskeletal         | F25D7.4        | F25D7.4/F32A7.5                                        |                   | I   | 1          | 3                    | 3              | 4.5          | 932    | claustrin like                                                  |
| Cytoskeletal         | F32A7.5        | F25D7.4/F32A7.5                                        |                   | I   | 1          | 4                    | 4              | 8.1          | 878    | claustrin like                                                  |
| Cytoskeletal         | F43G9.9        | F43G9.9                                                | <i>cpn-1</i>      | I   | 1          | 3                    | 2              | 26           | 192    | smooth muscle protein                                           |
| Cytoskeletal         | T11B7.4        | T11B7.4                                                | <i>eat-1</i>      | IV  | 1          | 3                    | 2              | 2.9          | 1424   | LIM domains, body wall muscle                                   |
| Cytoskeletal         | VW02B12L.3     | VW02B12L.3                                             |                   | II  | 1          | 3                    | 3              | 15.4         | 299    | EB1 like, Calponin like                                         |
| Cytoskeletal         | ZK617.1        | ZK617.1                                                | <i>unc-22</i>     | IV  | 1          | 3                    | 3              | 1.1          | 6831   | Fibronectin domain, IG domain, Ca/calmodulin dep protein kinase |
| Cytoskeletal         | C56G7.1        | C56G7.1                                                | <i>mlc-4</i>      | III | 1          | 2                    | 2              | 12.8         | 172    | myosin regulatory light chain                                   |
| Cytoskeletal         | K03H1.4        | K03H1.4                                                |                   | III | 1          | 2                    | 2              | 23           | 148    | Transferrin-like                                                |
| Cytoskeletal         | K07C5.1        | K07C5.1                                                | <i>arx-2</i>      | V   | 1          | 2                    | 2              | 8.4          | 395    | high similarity to ARP-2                                        |
| Cytoskeletal         | K10B4.3        | K10B4.3                                                |                   | III | 1          | 2                    | 2              | 7.5          | 827    | plecstrin like (cytoskeletal?)                                  |
| Cytoskeletal         | T10B10.3       | T10B10.3                                               |                   | X   | 1          | 2                    | 2              | 7.2          | 741    | plecstrin homolog domain, RUN domain                            |
| Cytoskeletal         | T21E12.4       | T21E12.4                                               | <i>dhc-1</i>      | I   | 1          | 7                    | 5              | 2.2          | 4568   | dynein heavy chain                                              |
| Cytoskeletal         | C18A11.7       | C18A11.7                                               | <i>dim-1</i>      | X   | 4          | 24                   | 10             | 15.9         | 640    | Disorganized Muscle <sup>8</sup>                                |
| Cytoskeletal         | F08B6.4        | F08B6.4                                                | <i>unc-87</i>     | I   | 3          | 25                   | 10             | 27.4         | 565    | calponin (smooth muscle)                                        |
| Cytoskeletal         | K07D8.1        | K07D8.1                                                | <i>mup-4</i>      | III | 3          | 24                   | 15             | 7.8          | 2104   | required for hypodermis and muscle junctional attachments       |
| Cytoskeletal         | F11G11.11      | F11G11.11                                              |                   | II  | 1          | 2                    | 2              | 9            | 345    | col-20 collagen                                                 |
| Signalling           | C46G7.4        | C46G7.4                                                | <i>pan-22</i>     | IV  | 2          | 15                   | 10             | 22.1         | 1175   | ZASP PDZ domain that bind actinin                               |
| Signalling           | K01G5.4        | K01G5.4                                                | <i>ran-1</i>      | III | 2          | 10                   | 6              | 27.9         | 215    | GTP-binding protein                                             |
| Signalling           | K07C11.2       | K07C11.2                                               | <i>air-1</i>      | V   | 2          | 6                    | 4              | 10.1         | 326    | Protein kinase                                                  |
| Signalling           | F52B5.2        | F52B5.2                                                |                   | I   | 2          | 2                    | 2              | 9.3          | 301    | Protein kinase                                                  |
| Signalling           | K07C5.8        | K07C5.8                                                |                   | V   | 2          | 2                    | 2              | 5.6          | 638    | WD domains (WD-40 repeat)                                       |
| Signalling           | Y54G9A.6       | Y54G9A.6                                               |                   | II  | 2          | 2                    | 2              | 11.4         | 343    | WD domain, G-beta repeat                                        |
| Signalling           | C14B9.4        | C14B9.4                                                | <i>plk-1</i>      | III | 1          | 6                    | 3              | 8.2          | 648    | POLO kinase                                                     |
| Signalling           | C29F9.7        | C29F9.7                                                | <i>pat-4</i>      | III | 1          | 5                    | 3              | 11.2         | 466    | integrin-linked kinase                                          |
| Signalling           | C03C10.1       | C03C10.1                                               | <i>kin-19</i>     | III | 1          | 4                    | 2              | 7.9          | 341    | casein kinase                                                   |
| Signalling           | F38H4.9        | F38H4.9                                                | <i>let-92</i>     | IV  | 1          | 4                    | 3              | 10.1         | 318    | Serine/threonine protein phosphatase                            |
| Signalling           | T05G5.3        | T05G5.3                                                | <i>cdk-1</i>      | III | 1          | 3                    | 3              | 16.3         | 332    | Serine/threonine protein phosphatase                            |
| Major Sperm          | C04G2.4        | MSP                                                    | <i>mso-36</i>     | IV  | 2          | 3                    | 2              | 23.6         | 127    | Major Sperm Protein Domain                                      |
| Major Sperm          | K07F5.2        | MSP                                                    | <i>mso-10</i>     | IV  | 2          | 3                    | 2              | 23.6         | 127    | Major Sperm Protein Domain                                      |
| Major Sperm          | K07F5.3        | MSP                                                    |                   | IV  | 2          | 3                    | 2              | 23.6         | 127    | Major Sperm Protein Domain                                      |
| Major Sperm          | R05F9.3        | MSP                                                    | <i>mso-32</i>     | II  | 2          | 3                    | 2              | 15.8         | 190    | Major Sperm Protein Domain                                      |
| Extracellular Matrix | B0280.5        | B0280.5                                                |                   | III | 2          | 6                    | 2              | 8.4          | 491    | chitin binding, gonad expression                                |
| Extracellular Matrix | C07G2.1        | C07G2.1                                                | <i>cej-1</i>      | III | 1          | 7                    | 3              | 8.2          | 584    | chitin binding                                                  |
| Extracellular Matrix | F25B4.9        | F25B4.9                                                |                   | V   | 1          | 6                    | 2              | 22.5         | 173    | Lectin                                                          |
| Extracellular Matrix | ZK1248.16      | ZK1248.16                                              | <i>lec-5</i>      | II  | 1          | 6                    | 3              | 11.1         | 314    | Lectin                                                          |
| Spindle              | C06G3.2        | C06G3.2                                                | <i>klp-18</i>     | IV  | 3          | 3                    | 3              | 6.1          | 932    | Kinesin-like protein 18                                         |
| Spindle              | C33H5.4        | C33H5.4                                                | <i>klp-10</i>     | IV  | 2          | 2                    | 2              | 5.4          | 690    | Kinesin-like protein 10                                         |
| Spindle              | T10F2.1        | T10F2.1                                                | <i>ars-1</i>      | III | 2          | 2                    | 2              | 4.3          | 742    | required for spindle stability                                  |
| Spindle              | M03D4.1        | M03D4.1                                                | <i>zen-4</i>      | IV  | 1          | 8                    | 5              | 10.8         | 775    | kinesin                                                         |
| Spindle              | K08E3.6        | K08E3.6                                                | <i>cyk-4</i>      | III | 2          | 6                    | 5              | 8.7          | 681    | GTPase-activator protein for Rho-like GTPases                   |
| Spindle              | F22B5.7        | F22B5.7                                                | <i>zva-9</i>      | II  | 1          | 4                    | 4              | 4.9          | 1415   | XMAP215/ch-TOG/Msps homolog                                     |
| Heat Shock           | K09C4.3        | K09C4.3                                                | <i>hsp-2</i>      | X   | 2          | 20                   | 8              | 18.1         | 310    | Heat Shock                                                      |
| Heat Shock           | R151.7         | R151.7                                                 | <i>hsp75</i>      | III | 2          | 5                    | 2              | 5.5          | 657    | Histidine kinase-, DNA gyrase B-, and HSP90-like ATPase         |
| Heat Shock           | Y63D3A.6       | Y63D3A.6                                               | <i>dni-29</i>     | I   | 2          | 2                    | 2              | 5.9          | 579    | prokaryotic heat shock protein                                  |
| Heat Shock           | C30C11.4       | C30C11.4                                               |                   | III | 1          | 8                    | 6              | 12.2         | 776    | Heat Shock 70                                                   |
| Heat Shock           | Y46H3A.2       | Y46H3A.2                                               |                   | V   | 1          | 8                    | 2              | 25.2         | 143    | Heat Shock                                                      |
| Heat Shock           | C17H12.1       | C17H12.1                                               | <i>hsp-16.41</i>  | IV  | 1          | 3                    | 3              | 6.8          | 643    | WD domain, G-beta repeats                                       |
| Heat Shock           | Y55F3AR.3      | Y55F3AR.3                                              |                   | IV  | 1          | 2                    | 2              | 4.4          | 591    | chaperonin                                                      |
| Nuclear Envelope     | C53D5.6        | C53D5.6                                                | <i>imb-3</i>      | I   | 3          | 3                    | 3              | 3.4          | 1092   | importin-beta-like                                              |
| Nuclear Envelope     | W04D2.1        | W04D2.1                                                |                   | V   | 2          | 19                   | 12             | 19.8         | 920    | alpha-actinin                                                   |
| Nuclear Envelope     | ZK742.1        | ZK742.1                                                |                   | V   | 2          | 3                    | 2              | 3.3          | 1080   | Exportin, beta-karyopherin                                      |
| Nuclear Envelope     | R05D11.3       | R05D11.3                                               | <i>ran-4</i>      | I   | 2          | 2                    | 2              | 30.8         | 133    | Putative nuclear transport factor                               |
| Nuclear Envelope     | Y54E5A.4       | Y54E5A.4                                               | <i>nop-4</i>      | I   | 2          | 2                    | 2              | 6.9          | 538    | Nuclear pore protein 4                                          |
| Nuclear Envelope     | C29E4.4        | C29E4.4                                                |                   | III | 1          | 3                    | 3              | 3.1          | 1212   | Nup133 nucleoporin family                                       |
| Nuclear Envelope     | F28B3.8        | F28B3.8                                                | <i>imb-1</i>      | I   | 1          | 3                    | 3              | 9.7          | 896    | importin B                                                      |
| Other                | C25B8.4        | C25B8.4                                                |                   | X   | 2          | 14                   | 4              | 27.8         | 212    | asialoglycoprotein receptor                                     |
| Other                | F54F2.1        | F54F2.1                                                |                   | III | 2          | 11                   | 10             | 16.2         | 1226   | Vitronectin receptor alpha subunit                              |
| Other                | C09D1.1        | C09D1.1                                                | <i>unc-89</i>     | I   | 2          | 9                    | 7              | 2.2          | 6632   | immunoglobulin-like protein                                     |
| Other                | ZK1290.12      | ZK1290.12                                              | <i>wrt-1</i>      | II  | 2          | 6                    | 4              | 4.8          | 484    | warthog gene                                                    |
| Other                | F23F1.8        | F23F1.8                                                | <i>rat-4</i>      | II  | 2          | 5                    | 3              | 11.1         | 406    | Putative ATPase subunit of 19S proteasome particle              |
| Other                | T01B10.2       | T01B10.2                                               | <i>ard-1</i>      | X   | 2          | 5                    | 3              | 19.7         | 289    | aroundhoq like/hedqehq like                                     |
| Other                | F26E4.3        | F26E4.3                                                |                   | I   | 2          | 4                    | 4              | 10.4         | 491    | cysteine protease                                               |
| Other                | Y38C1AA.2      | Y38C1AA.2                                              | <i>csn-3</i>      | IV  | 2          | 4                    | 4              | 4.4          | 724    | COP9/signalosome complex                                        |
| Other                | Y57G11C.10     | Y57G11C.10                                             | <i>adi-1</i>      | IV  | 2          | 4                    | 3              | 13.7         | 444    | GDI-1 GDP dissociation inhibitor                                |
| Other                | C02A12.4       | C02A12.4                                               | <i>lys-7</i>      | V   | 2          | 3                    | 2              | 11           | 283    | Lysozyme 7                                                      |
| Other                | C30C11.2       | C30C11.2                                               | <i>rpn-3</i>      | III | 2          | 3                    | 2              | 5.2          | 504    | Proteasome regulatory particle non-ATPase-like 3                |
| Other                | F10G7.8        | F10G7.8                                                | <i>rpn-5</i>      | II  | 2          | 3                    | 2              | 9.6          | 490    | Proteasome regulatory particle non-ATPase-like 5                |
| Other                | F32A5.2        | F32A5.2                                                |                   | II  | 2          | 2                    | 2              | 3.3          | 1000   | ShTK domain; Animal haem peroxidases                            |
| Other                | T03G6.3        | T03G6.3                                                |                   | X   | 2          | 2                    | 2              | 7.1          | 465    | Type I phosphodiesterase / nucleotide pyrophosphatase           |
| Other                | T13F2.8        | T13F2.8                                                | <i>cav-1</i>      | IV  | 2          | 2                    | 2              | 13.2         | 235    | Enzyme activator that functions in meiosis                      |
| Other                | F57B9.10       | F57B9.10                                               | <i>rpn-6</i>      | III | 1          | 9                    | 4              | 12.8         | 438    | proteasome component                                            |
| Other                | F40E10.1       | F40E10.1                                               | <i>hch-1</i>      | X   | 1          | 7                    | 6              | 8.9          | 605    | metalloprotease                                                 |
| Other                | F29G9.5        | F29G9.5                                                | <i>rat-2</i>      | V   | 1          | 5                    | 4              | 16.7         | 443    | AAA ATPase                                                      |
| Other                | F21H12.6       | F21H12.6                                               |                   | II  | 1          | 4                    | 3              | 5.2          | 1374   | serine protease subtilase                                       |
| Other                | H13N06.6       | H13N06.6                                               |                   | X   | 1          | 4                    | 3              | 5.2          | 633    | Copper type II, ascorbate-dependent monooxygenase               |
| Other                | T06D8.8        | T06D8.8                                                | <i>rpn-9</i>      | II  | 1          | 4                    | 2              | 11.9         | 387    | Putative non-ATPase subunit                                     |
| Other                | T12D8.8        | T12D8.8                                                |                   | III | 1          | 4                    | 4              | 19.4         | 422    | TPR heat shock                                                  |
| Other                | F23F12.6       | F23F12.6                                               | <i>rat-3</i>      | III | 1          | 3                    | 3              | 13.5         | 414    | AAA ATPase, proteasome subunit                                  |
| Other                | F41E6.2        | F41E6.2                                                | <i>ard-5</i>      | V   | 1          | 3                    | 3              | 21.6         | 102    | predicted secreted protein, aroundhoq family                    |
| Other                | F44E7.4        | F44E7.4                                                |                   | V   | 1          | 3                    | 3              | 3.5          | 1067   | peptidase                                                       |

| Functional Category | Predicted Gene | Family ID (when peptides identify more than 1 protein) | C. elegans locus | LG  | Abundance  |                      | Sequence Count | Coverage (%) | Length | Descriptor                                      |
|---------------------|----------------|--------------------------------------------------------|------------------|-----|------------|----------------------|----------------|--------------|--------|-------------------------------------------------|
|                     |                |                                                        |                  |     | Occurrence | Total Spectrum Count |                |              |        |                                                 |
| Other               | R01H2.6        | R01H2.6                                                | <i>unc-116</i>   | III | 1          | 3                    | 3              | 24.8         | 153    | E2 ubiquitin-conjugating enzyme                 |
| Other               | R05D3.7        | R05D3.7                                                | <i>unc-116</i>   | III | 1          | 3                    | 3              | 7.6          | 815    | kinesin heavy chain                             |
| Other               | R12H7.2        | R12H7.2                                                | <i>asp-4</i>     | X   | 1          | 3                    | 3              | 11.7         | 444    | aspartyl protease                               |
| Other               | Y39E4B.1       | Y39E4B.1                                               |                  | III | 1          | 3                    | 3              | 6.6          | 610    | ABC transporter, AAA ATPase, metal binding      |
| Other               | Y44E3A.6       | Y44E3A.6                                               |                  | I   | 1          | 3                    | 3              | 3            | 932    | serine protease, forkhead associated            |
| Other               | C17G1.6        | C17G1.6                                                | <i>nas-37</i>    | X   | 1          | 2                    | 2              | 4.5          | 736    | zinc metalloprotease                            |
| Other               | C27H6.2        | C27H6.2                                                |                  | V   | 1          | 2                    | 2              | 4.6          | 458    | AAA ATPase                                      |
| Other               | C52E4.4        | C52E4.4                                                | <i>rpt-1</i>     | V   | 1          | 2                    | 2              | 2.8          | 435    | protease regulatory subunit, AAA ATPase         |
| Other               | F21F8.7        | F21F8.7                                                | <i>asp-6</i>     | III | 1          | 2                    | 2              | 14.9         | 389    | protease                                        |
| Other               | Y71G12B.10     | Y71G12B.10                                             |                  | I   | 1          | 2                    | 2              | 11.3         | 318    | HMG-CoA lyase                                   |
| Unknown             | Y37D8A.19      | Y37D8A.19                                              |                  | III | 4          | 23                   | 4              | 42.6         | 101    |                                                 |
| Unknown             | C44B12.1       | C44B12.1                                               |                  | IV  | 3          | 31                   | 9              | 28.6         | 203    |                                                 |
| Unknown             | C39D10.7       | C39D10.7                                               |                  | X   | 3          | 13                   | 8              | 11.3         | 1185   |                                                 |
| Unknown             | F54E2.3        | F54E2.3                                                | <i>pqn-43</i>    | V   | 2          | 17                   | 12             | 6.4          | 4488   |                                                 |
| Unknown             | Y18D10A.17     | Y18D10A.17                                             |                  | I   | 2          | 10                   | 8              | 24.4         | 340    |                                                 |
| Unknown             | C18B2.3        | C18B2.3                                                |                  | X   | 2          | 9                    | 3              | 26.3         | 236    |                                                 |
| Unknown             | C46C2.5        | C46C2.5                                                |                  | IV  | 2          | 8                    | 5              | 14.3         | 223    |                                                 |
| Unknown             | Y65B4BR.6      | Y65B4BR.6                                              | <i>arl-16</i>    | I   | 2          | 8                    | 3              | 9.2          | 393    | groundhog like                                  |
| Unknown             | Y39G10AR.12    | Y39G10AR.12                                            |                  | I   | 2          | 6                    | 3              | 10.3         | 507    |                                                 |
| Unknown             | ZK84.1         | ZK84.1                                                 |                  | II  | 2          | 6                    | 3              | 3.6          | 801    |                                                 |
| Unknown             | T19H12.2       | T19H12.2                                               |                  | V   | 2          | 4                    | 4              | 30.7         | 225    |                                                 |
| Unknown             | T06E4.8        | T06E4.8                                                |                  | V   | 2          | 4                    | 2              | 22.1         | 199    |                                                 |
| Unknown             | AC3.5          | AC3.5                                                  |                  | V   | 2          | 2                    | 2              | 3.1          | 1071   | M1 peptidase family of aminopeptidases.         |
| Unknown             | B0361.3        | B0361.3                                                |                  | III | 2          | 2                    | 2              | 3            | 1221   |                                                 |
| Unknown             | C06G1.4        | C06G1.4                                                |                  | X   | 2          | 2                    | 2              | 6.7          | 683    |                                                 |
| Unknown             | D1081.7        | D1081.7                                                |                  | I   | 2          | 2                    | 2              | 4.6          | 857    |                                                 |
| Unknown             | F16B12.6       | F16B12.6                                               |                  | X   | 2          | 2                    | 2              | 2.2          | 1417   |                                                 |
| Unknown             | F42A8.1        | F42A8.1                                                |                  | II  | 2          | 2                    | 2              | 6.8          | 370    |                                                 |
| Unknown             | K08H2.1        | K08H2.1                                                | <i>skr-21</i>    | X   | 2          | 2                    | 2              | 23.3         | 176    | Skp1 family dimerization domain                 |
| Unknown             | Y23H5A.3       | Y23H5A.3                                               |                  | I   | 2          | 2                    | 2              | 11.1         | 307    |                                                 |
| Unknown             | Y32G9A.8       | Y32G9A.8                                               |                  | V   | 2          | 2                    | 2              | 11.6         | 345    | immunoglobulin subtype                          |
| Unknown             | Y39G10AR.10    | Y39G10AR.10                                            |                  | I   | 2          | 2                    | 2              | 5.4          | 690    | involved in embryogenesis                       |
| Unknown             | ZC123.1        | ZC123.1                                                |                  | I   | 2          | 2                    | 2              | 5.8          | 730    |                                                 |
| Unknown             | ZK1236.3       | ZK1236.3                                               |                  | III | 2          | 2                    | 2              | 4.3          | 1000   |                                                 |
| Unknown             | Y62H9A.5       | Y62H9A.5                                               |                  | X   | 1          | 19                   | 6              | 18.7         | 123    |                                                 |
| Unknown             | C08F11.11      | C08F11.11                                              |                  | IV  | 1          | 9                    | 6              | 60.4         | 111    |                                                 |
| Unknown             | F25H2.11       | F25H2.11                                               |                  | I   | 1          | 8                    | 6              | 36.5         | 181    | translationally controlled tumor protein        |
| Unknown             | Y55F3AM.13     | Y55F3AM.13                                             |                  | IV  | 1          | 8                    | 4              | 19.5         | 354    |                                                 |
| Unknown             | K07C11.7       | K07C11.7                                               |                  | V   | 1          | 7                    | 4              | 19           | 290    | calcineurin-like phosphoesterase                |
| Unknown             | W05E7.1        | W05E7.1                                                | <i>ard-3</i>     | IV  | 1          | 7                    | 3              | 16.2         | 359    | groundhog family                                |
| Unknown             | F33E11.6       | F33E11.6                                               |                  | V   | 1          | 6                    | 2              | 8.9          | 393    |                                                 |
| Unknown             | C23F12.1       | C23F12.1                                               |                  | X   | 1          | 5                    | 4              | 6.3          | 1874   |                                                 |
| Unknown             | C25A8.4        | C25A8.4                                                |                  | IV  | 1          | 5                    | 2              | 3.3          | 1050   |                                                 |
| Unknown             | C34C12.5       | C34C12.5                                               |                  | III | 1          | 5                    | 2              | 14.9         | 268    |                                                 |
| Unknown             | F20D1.3        | F20D1.3                                                |                  | X   | 1          | 5                    | 4              | 11.7         | 478    |                                                 |
| Unknown             | F25H8.5        | F25H8.5                                                | <i>dur-1</i>     | IV  | 1          | 5                    | 5              | 7.6          | 798    | dauer upregulated gene                          |
| Unknown             | F56D3.1        | F56D3.1                                                |                  | II  | 1          | 5                    | 3              | 12.7         | 441    |                                                 |
| Unknown             | R05D11.8       | R05D11.8                                               |                  | I   | 1          | 5                    | 2              | 6.4          | 566    |                                                 |
| Unknown             | T06E4.9        | T06E4.9                                                |                  | V   | 1          | 5                    | 4              | 33           | 212    |                                                 |
| Unknown             | W01A8.1        | W01A8.1                                                |                  | I   | 1          | 5                    | 3              | 11.6         | 415    |                                                 |
| Unknown             | Y55F3AM.12     | Y55F3AM.12                                             |                  | IV  | 1          | 5                    | 5              | 14.5         | 332    |                                                 |
| Unknown             | C13B4.2        | C13B4.2                                                | <i>usp-14</i>    | II  | 1          | 4                    | 4              | 10.2         | 489    | Ubiquitin carboxyl-terminal hydrolases family 2 |
| Unknown             | F02A9.3        | F02A9.3                                                | <i>far-2</i>     | III | 1          | 4                    | 2              | 19.8         | 182    | fatty acid binding protein                      |
| Unknown             | T12D8.6        | T12D8.6                                                |                  | III | 1          | 4                    | 2              | 29.6         | 142    | EF hand                                         |
| Unknown             | T14G12.3       | T14G12.3                                               |                  | X   | 1          | 4                    | 3              | 16.4         | 201    |                                                 |
| Unknown             | Y22D7AR.10     | Y22D7AR.10                                             |                  | III | 1          | 4                    | 2              | 44.9         | 69     |                                                 |
| Unknown             | Y77E11A.12     | Y77E11A.12                                             |                  | IV  | 1          | 4                    | 3              | 3.6          | 782    |                                                 |
| Unknown             | C03E10.6       | C03E10.6                                               |                  | V   | 1          | 3                    | 2              | 43.9         | 98     |                                                 |
| Unknown             | C56C10.3       | C56C10.3                                               |                  | II  | 1          | 3                    | 2              | 18.1         | 221    |                                                 |
| Unknown             | F11E6.7        | F11E6.7                                                |                  | IV  | 1          | 3                    | 2              | 4            | 1011   |                                                 |
| Unknown             | F26F4.1        | F26F4.1                                                |                  | III | 1          | 3                    | 3              | 15.5         | 362    |                                                 |
| Unknown             | F42A6.3        | F42A6.3                                                |                  | IV  | 1          | 3                    | 3              | 7.2          | 585    |                                                 |
| Unknown             | R06C7.7        | R06C7.7                                                | <i>lin-61</i>    | I   | 1          | 3                    | 2              | 6.3          | 619    | mbt domain found in nuclear proteins            |
| Unknown             | T25E4.1        | T25E4.1                                                |                  | II  | 1          | 3                    | 2              | 17.7         | 231    |                                                 |
| Unknown             | T27A3.2        | T27A3.2                                                |                  | I   | 1          | 3                    | 3              | 7.1          | 789    | ubiquitin carboxyl-terminal hydrolase           |
| Unknown             | Y62H9A.6       | Y62H9A.6                                               |                  | X   | 1          | 3                    | 2              | 6.1          | 181    |                                                 |
| Unknown             | B0041.2        | B0041.2                                                |                  | I   | 1          | 2                    | 2              | 5.2          | 706    |                                                 |
| Unknown             | B0379.1        | B0379.1                                                |                  | I   | 1          | 2                    | 2              | 10.8         | 212    |                                                 |
| Unknown             | C49G7.3        | C49G7.3                                                |                  | V   | 1          | 2                    | 2              | 11.3         | 248    |                                                 |
| Unknown             | F10D11.6       | F10D11.6                                               |                  | I   | 1          | 2                    | 2              | 6.6          | 846    | lipid binding                                   |
| Unknown             | F11C7.5        | F11C7.5                                                |                  | X   | 1          | 2                    | 2              | 19           | 189    |                                                 |
| Unknown             | F47B7.7        | F47B7.7                                                |                  | X   | 1          | 2                    | 2              | 11.7         | 350    |                                                 |
| Unknown             | F48A11.5       | F48A11.5                                               |                  | II  | 1          | 2                    | 2              | 6.6          | 632    | UBX                                             |
| Unknown             | R05D11.9       | R05D11.9                                               |                  | I   | 1          | 2                    | 2              | 3.8          | 655    |                                                 |
| Unknown             | T06E4.7        | T06E4.7                                                |                  | V   | 1          | 2                    | 2              | 10           | 441    | nematode 7 TM chemoreceptor                     |
| Unknown             | T23E7.2        | T23E7.2                                                |                  | X   | 1          | 2                    | 2              | 3.2          | 930    |                                                 |
| Unknown             | Y116A8A.9      | Y116A8A.9                                              |                  | IV  | 1          | 2                    | 2              | 6.8          | 444    |                                                 |
| Unknown             | Y57A10A.18     | Y57A10A.18                                             | <i>pqn-87</i>    | II  | 1          | 2                    | 2              | 2.1          | 1512   | MATH domain                                     |

Functional Category determination is described in Supplemental Methods; Family ID, designation for families of proteins not differentiated by a set of identifying peptides; LG, chromosomal location; Occurrences, the number of preparations in which a protein was identified out of 5 oogenic preparations; Total Spectrum Count, the total number of peptides detected for each protein from all preparations; Sequence Count, the number of distinct MS/MS spectra collected from all preparations; Coverage, % of protein represented by uniquely identified peptides; Length, number of amino acids in protein; Descriptor, protein description through homology or provided in WormBase, Worm Protein Database (BIOBASE) annotations.

Supplementary Table 5 **Composition of chromatin samples**

| Sample Type<br>Category | a. Sample Composition Before Subtraction<br>% Abundance (TSC) in Sample |          |          |                         | b. Sample Composition After Subtraction<br>% of Proteins (No. in Sample) |            | c. Subtraction Summary per Category<br>% of Proteins (No. in Category) |            |
|-------------------------|-------------------------------------------------------------------------|----------|----------|-------------------------|--------------------------------------------------------------------------|------------|------------------------------------------------------------------------|------------|
|                         | Total                                                                   | ≤2 Occur | ≥3 Occur | Oogenic Chromatin Total | Spermatogenesis-Enriched                                                 | Subtracted | Spermatogenesis-Enriched                                               | Subtracted |
| DNA                     | 17.5                                                                    | 0.7      | 16.8     | 18.8                    | 6.0 (8)                                                                  | 24.3 (90)  | 9.1                                                                    | 90.9       |
| RNA                     | 20.7                                                                    | 2.5      | 18.2     | 15.6                    | 22.7 (30)                                                                | 23.5 (87)  | 25.6                                                                   | 74.3       |
| Housekeeping            | 18.8                                                                    | 2.9      | 15.9     | 11.7                    | 10.6 (14)                                                                | 19.2 (71)  | 16.5                                                                   | 83.5       |
| Cytoskeletal            | 11.4                                                                    | 0.5      | 10.9     | 19.2                    | 0.8 (1)                                                                  | 7.3 (27)   | 3.6                                                                    | 96.4       |
| Signalling              | 2.7                                                                     | 0.7      | 2.0      | 1.9                     | 8.3 (11)                                                                 | 3 (11)     | 50.0                                                                   | 50.0       |
| MSP                     | 1.9                                                                     | 0.1      | 1.8      | 0.1                     | 3.8 (5)                                                                  | 0.3 (1)    | 16.7                                                                   | 83.3       |
| Extracellular Matrix    | 2.5                                                                     | 0.3      | 2.1      | 2.4                     | 6.8 (9)                                                                  | 2.4 (9)    | 50.0                                                                   | 50.0       |
| Spindle                 | 1.7                                                                     | 0.0      | 1.7      | 3                       | 0 (0)                                                                    | 2.4 (9)    | 0.0                                                                    | 100.0      |
| Heat Shock              | 0.6                                                                     | 0.5      | 0.1      | 6.5                     | 0 (0)                                                                    | 0.5 (2)    | 0.0                                                                    | 100.0      |
| Vitellogenin            | 1.3                                                                     | 0.0      | 1.3      | 7.7                     | 0 (0)                                                                    | 1.6 (6)    | 0.0                                                                    | 100.0      |
| Nuclear Envelope        | 1.3                                                                     | 0.2      | 1.1      | 1.4                     | 0 (0)                                                                    | 1.9 (7)    | 0.0                                                                    | 100.0      |
| Other                   | 5.0                                                                     | 0.9      | 4.1      | 4                       | 6.1 (8)                                                                  | 7.3 (27)   | 22.9                                                                   | 77.1       |
| Unknown                 | 14.7                                                                    | 2.4      | 12.3     | 7.7                     | 34.8 (46)                                                                | 6.2 (23)   | 66.1                                                                   | 33.9       |
| <b>Total</b>            | 100                                                                     | 11.8     | 88.2     | 100                     | 100 (132)                                                                | 100 (370)  | 26.3                                                                   | 73.7       |

TSC = Total Spectral Count; % Abundance (TSC) in Sample = (TSC for proteins in each functional category)/(Total TSC in chromatin sample); % of Proteins in Sample = (Number of proteins in functional category)/(Total number of proteins in chromatin sample); % of Proteins in Category = (Number of proteins in sample type)/(Total number of proteins in category)



Supplemental Table 6 RNAi analysis of genes encoding abundant spermatogenesis-enriched proteins copurified with chromatin

| Predicted Gene | <i>C. elegans</i> Locus | Descriptor                                            | Previous phenotype                    | Sterility Category                        |                                   |                          |                                 |                     |                 | New Evidence for Fertility Function (this study) | Overall RNAi Class |
|----------------|-------------------------|-------------------------------------------------------|---------------------------------------|-------------------------------------------|-----------------------------------|--------------------------|---------------------------------|---------------------|-----------------|--------------------------------------------------|--------------------|
|                |                         |                                                       |                                       | % Progeny Production of control (P value) | Progeny No. Variability (P value) | % Oocytes (P value)      | % Embryonic Lethality (P value) | Cytological Defects | Sex Specificity |                                                  |                    |
| F55F8.2        |                         | DEAD box RNA helicase                                 | Gro Stp                               | 0                                         |                                   |                          |                                 | yes                 |                 | Complete F1 Sterility Gro Sck                    |                    |
| M01E5.5        | <i>top-1</i>            | Topoisomerase I                                       | Ste Mlt Him<br>Rup Gro Dpy<br>Lva Lvl | 0                                         |                                   |                          |                                 | yes                 |                 | Complete F1 Sterility Gro                        |                    |
| Y48A6B.3       |                         | ribosomal protein                                     | Gro                                   | 0                                         |                                   |                          |                                 | yes                 | Sterility       | Complete F1 Sterility Gro                        |                    |
| C25G4.6 *      | <i>smz-1</i>            | PDZ domain                                            | Male Ste                              | 33% (6e <sup>-10</sup> )                  |                                   | 41% (6e <sup>-10</sup> ) | 13% (2e <sup>-6</sup> )         | yes                 | sperm           | High Male Ste                                    |                    |
| T21G5.4 *      | <i>smz-2</i>            | PDZ domain                                            | Stp Lva Pvl                           | 19% (6e <sup>-10</sup> )                  |                                   | 67% (6e <sup>-10</sup> ) | 12% (4e <sup>-6</sup> )         | yes                 | sperm           | Male sterility<br>High Male Ste                  |                    |
| T03F1.5 †      | <i>gsp-4</i>            | glc7/PP1 phosphatase                                  | Ste                                   | 57% (6e <sup>-9</sup> )                   | 0.0002                            |                          | 29% (3e <sup>-11</sup> )        | yes                 | sperm           | Male sterility<br>High Male Ste                  |                    |
| W09C3.6 †      | <i>gsp-3</i>            | glc7/PP1 phosphatase                                  | Male Ste                              | 62% (6e <sup>-9</sup> )                   | 0.0003                            |                          | 34% (2e <sup>-12</sup> )        | yes                 | sperm           | High Male Ste                                    |                    |
| B0261.6        |                         | Novel                                                 | WT                                    | 50% (2e <sup>-11</sup> )                  |                                   | 11% (3e <sup>-7</sup> )  | 10% (5e <sup>-3</sup> )         | yes                 |                 | Sterility<br>High Ste                            |                    |
| F23B12.7       |                         | CBF/Mak21 family, CCAAT binding factor 1 protein like | Stp Gro Lva                           | 52% (9e <sup>-7</sup> )                   | 0.0002                            |                          |                                 | yes                 |                 | High Ste Gro                                     |                    |
| K04C2.2        |                         | DNA polymerase V                                      | Gro Pch Ste<br>Stp Lvl Sck            | 63% (6e <sup>-10</sup> )                  | 0.01                              |                          |                                 |                     |                 | High Ste                                         |                    |
| B0207.5        |                         | Novel                                                 | WT                                    | 83% (.02)                                 |                                   |                          |                                 | yes                 |                 | Sterility<br>Moderate Ste                        |                    |
| C30F12.7       |                         | isocitrate dehydrogenase                              | WT                                    | 72% (3e <sup>-4</sup> )                   |                                   |                          |                                 |                     |                 | Sterility<br>Moderate Ste                        |                    |
| C33H5.12       | <i>rsp-6</i>            | SR Protein                                            | WT                                    | 82% (.04)                                 | 0.0003                            | 8% (3e <sup>-4</sup> )   |                                 | yes                 |                 | Sterility<br>Moderate Ste                        |                    |
| F14D2.7        |                         | Novel                                                 | WT                                    | 81% (.01)                                 | 0.02                              |                          | 10% (1e <sup>-4</sup> )         | yes                 |                 | Sterility<br>Moderate Ste                        |                    |
| F27C8.5        |                         | BTB/POZ domain                                        | WT                                    | 87% (.002)                                |                                   | 11% (3e <sup>-5</sup> )  |                                 | yes                 |                 | Sterility<br>Moderate Ste                        |                    |
| F38A5.6        |                         | Novel                                                 | WT                                    | 87% (.02)                                 | 0.04                              |                          |                                 | yes                 |                 | Sterility<br>Moderate Ste                        |                    |
| F54C8.1        |                         | 3-hydroxyacyl-CoA dehydrogenase                       | WT                                    | 81% (.01)                                 |                                   |                          | 10% (0.007)                     |                     |                 | Sterility<br>Moderate Ste                        |                    |
| K03H1.1        |                         | Glutamine synthetase                                  | WT                                    | 74% (.008)                                |                                   |                          |                                 |                     |                 | Sterility<br>Moderate Ste                        |                    |
| T13A10.11      | <i>tag-32</i>           | S-adenosylmethionine synthetase                       | Gro Unc                               | 79% (.03)                                 | 0.0005                            |                          |                                 |                     |                 | Sterility<br>Moderate Ste<br>Gro                 |                    |
| Y45F3A.1       |                         | Novel                                                 | Stp                                   | 85% (.01)                                 |                                   |                          |                                 |                     |                 | Moderate Ste                                     |                    |
| Y52B11A.5      |                         | C-type lectin                                         | WT                                    | 77% (.003)                                |                                   |                          | 12% (2e <sup>-4</sup> )         |                     |                 | Sterility<br>Moderate Ste                        |                    |
| Y54F10BM.2     |                         | Translation initiation factor IF-2                    | Ste Lva                               | 78% (.007)                                |                                   | 6% (0.003)               |                                 | yes                 |                 | Moderate Ste                                     |                    |
| Y71H10A.1      |                         | phosphofructokinase                                   | Emb                                   | 79% (.008)                                | 0.01                              |                          | 11% (6e <sup>-6</sup> )         |                     |                 | Sterility<br>Moderate Ste                        |                    |
| C04G2.8 §      | <i>spch-1</i>           | Novel                                                 | WT                                    |                                           | 0.006                             |                          | 18% (1e <sup>-4</sup> )         |                     |                 | Sterility<br>Low Ste                             |                    |
| C14F11.7       |                         | Novel                                                 | WT                                    |                                           |                                   |                          | 8% (0.008)                      |                     |                 | Sterility<br>Low Ste                             |                    |
| C17G10.8       | <i>dhs-6</i>            | alcohol dehydrogenase                                 | WT                                    |                                           | 0.0004                            |                          |                                 |                     |                 | Sterility<br>Low Ste                             |                    |
| C18G1.5        | <i>hil-4</i>            | Histone H1                                            | Abnormal Gonad                        |                                           |                                   |                          | 9% (0.008)                      | yes                 |                 | Low Ste                                          |                    |
| C49C3.11       |                         | lectin                                                | Ste                                   |                                           | 0.0005                            |                          |                                 |                     |                 | Low Ste                                          |                    |

| Predicted Gene | <i>C. elegans</i> Locus | Descriptor                                               | Previous phenotype  | Sterility Category                        |                                   |                        |                                 |                     |                 | New Evidence for Fertility Function (this study) | Overall RNAi Class |                                     |
|----------------|-------------------------|----------------------------------------------------------|---------------------|-------------------------------------------|-----------------------------------|------------------------|---------------------------------|---------------------|-----------------|--------------------------------------------------|--------------------|-------------------------------------|
|                |                         |                                                          |                     | % Progeny Production of control (P value) | Progeny No. Variability (P value) | % Oocytes (P value)    | % Embryonic Lethality (P value) | Cytological Defects | Sex Specificity |                                                  |                    |                                     |
| F25E5.3        |                         | serine protease                                          | WT                  |                                           | 0.0005                            |                        |                                 |                     |                 |                                                  | Sterility          | Low Ste                             |
| K08C9.2        |                         | Novel                                                    | Ste                 |                                           |                                   |                        |                                 | yes                 |                 |                                                  |                    | Low Ste                             |
| T10E9.4        |                         | DX module                                                | WT                  |                                           |                                   | 8% (4e <sup>-6</sup> ) |                                 |                     |                 |                                                  | Sterility          | Low Ste                             |
| Y38H8A.3       |                         | serine/threonine kinase                                  | WT                  |                                           |                                   | 5% (0.03)              | 8% (0.009)                      |                     |                 |                                                  | Sterility          | Low Ste                             |
| D1007.6        | <i>rps-10</i>           | small ribosomal subunit                                  | Emb Unc Ste Lva     | N/A                                       |                                   |                        |                                 |                     |                 |                                                  |                    | Complete F1 Lethality (Emb)         |
| E04A4.8        | <i>rpl-20</i>           | large ribosomal subunit                                  | Emb Ste             | N/A                                       |                                   |                        |                                 |                     |                 |                                                  |                    | Complete F1 Lethality (Emb)         |
| F07A11.2       |                         | Glucosamine 6-phosphate synthetase                       | Emb Ste             | N/A                                       |                                   |                        |                                 |                     |                 |                                                  |                    | Complete F1 Lethality (Emb)         |
| F26E4.9        | <i>cco-1</i>            | Cytochrome c oxidase                                     | Gro Clr Ste Age Lpd | N/A                                       |                                   |                        |                                 |                     |                 |                                                  |                    | Complete F1 Lethality (Emb)         |
| F36A4.7        | <i>ama-1</i>            | RNA polymerase II                                        | Emb Gro             | N/A                                       |                                   |                        |                                 |                     |                 |                                                  |                    | Complete F1 Lethality (Emb)         |
| JC8.3          | <i>rpl-12</i>           | ribosomal protein                                        | Emb Ste Gro         | N/A                                       |                                   |                        |                                 |                     |                 |                                                  |                    | Complete F1 Lethality (Emb)         |
| T03F1.9        | <i>hcp-4</i>            | centromere component                                     | Emb Mul             | N/A                                       |                                   |                        |                                 |                     |                 |                                                  |                    | Complete F1 Lethality (Emb)         |
| Y111B2A.18     | <i>rsp-3</i>            | SR protein splicing factor                               | Emb Lva             | N/A                                       |                                   |                        |                                 |                     |                 |                                                  |                    | Complete F1 Lethality (Emb)         |
| ZK328.2        | <i>eft-1</i>            | Elongation factor                                        | Emb Ste Sck         | N/A                                       |                                   |                        |                                 |                     |                 |                                                  |                    | Complete F1 Lethality (Emb)         |
| B0365.3        | <i>eat-6</i>            | Na <sup>(+)</sup> /K <sup>(+)</sup> ATPase alpha subunit | Emb Lva             | N/A                                       |                                   |                        |                                 |                     |                 |                                                  |                    | Complete F1 Lethality (Emb Lvl/Lva) |
| C16A3.3        |                         | Small GTP-binding protein domain                         | Gro Emb Egl Gon Lva | N/A                                       |                                   |                        |                                 |                     |                 |                                                  |                    | Complete F1 Lethality (Emb Lvl/Lva) |
| C18A3.3        |                         | RNA-processing protein, HAT helix                        | Emb Lva Pvl Ste     | N/A                                       |                                   |                        |                                 |                     |                 |                                                  |                    | Complete F1 Lethality (Emb Lvl/Lva) |
| C32E8.2        | <i>rpl-13</i>           | large ribosomal subunit                                  | Emb                 | N/A                                       |                                   |                        |                                 |                     |                 |                                                  |                    | Complete F1 Lethality (Emb Lvl/Lva) |
| F36A2.7        |                         | Novel                                                    | Emb Gro Sle         | N/A                                       |                                   |                        |                                 |                     |                 |                                                  |                    | Complete F1 Lethality (Emb Lvl/Lva) |
| K12H4.3        |                         | Brix domain-Ribosome biogenesis                          | Stp Emb Gro Lva     | N/A                                       |                                   |                        |                                 |                     |                 |                                                  |                    | Complete F1 Lethality (Emb Lvl/Lva) |
| T07A9.9        |                         | Small GTP-binding protein domain (ribosome biogenesis)   | Dpy Emb Gro Sma     | N/A                                       |                                   |                        |                                 |                     |                 |                                                  |                    | Complete F1 Lethality (Emb Lvl/Lva) |
| W07E6.1        |                         | nucleolar protein                                        | Gro Pch Stp Lon Lva | N/A                                       |                                   |                        |                                 |                     |                 |                                                  |                    | Complete F1 Lethality (Emb Lvl/Lva) |
| ZK809.3        |                         | Novel                                                    | Emb Gro Lva         | N/A                                       |                                   |                        |                                 |                     |                 |                                                  |                    | Complete F1 Lethality (Emb Lvl/Lva) |

\*, †, § Symbols denote highly identical genes whose products may be depleted simultaneously by RNAi. Sterility categories and Overall RNAi classes are defined in Supplemental Methods and Supplemental Legends. Abbreviations: N/A, not applicable; Ste, sterile; Stp, sterile progeny; Emb, embryonic lethal; Lvl, larval lethal; Lva, larval arrest; Pvl, protruding vulva; Mul, multi-nuclei in early embryo; Mlt, molting defective; Him, high incidence of males; Rvp, exploded; Gro, slow growth; Dpy, dumpy; Lvl, larval lethal; Sck, sick

Supplemental Table 7 Additional *C. elegans* abundant spermatogenesis-enriched chromatin proteins with function in fertility

| Gene ID                                                                                  | Gene Name     | Descriptor                                | <i>C. elegans</i> |                                                                                |                                                                                          |                               |                                                                     | Mammalian                                                                                                                           |                                                                                                                                                                               |
|------------------------------------------------------------------------------------------|---------------|-------------------------------------------|-------------------|--------------------------------------------------------------------------------|------------------------------------------------------------------------------------------|-------------------------------|---------------------------------------------------------------------|-------------------------------------------------------------------------------------------------------------------------------------|-------------------------------------------------------------------------------------------------------------------------------------------------------------------------------|
|                                                                                          |               |                                           | Localization      | RNAi Cytological Defects                                                       |                                                                                          | Phenotype                     | Sum: New Evidence for Fertility Function                            | Known Homolog                                                                                                                       | Fertility Link                                                                                                                                                                |
|                                                                                          |               |                                           |                   | Male                                                                           | Hermaphrodite                                                                            |                               |                                                                     |                                                                                                                                     |                                                                                                                                                                               |
| <b>Category III: Additional proteins with function in fertility in <i>C. elegans</i></b> |               |                                           |                   |                                                                                |                                                                                          |                               |                                                                     |                                                                                                                                     |                                                                                                                                                                               |
| F55F8.2                                                                                  |               | RNA helicase                              |                   | abnormal gonad morphology, abnormal progression                                | abnormal gonad development, disorganized gonad, Emo                                      | Complete F1 Sterility Gro Sck | hermaphrodite sterility, herm and male cytological defects          | M, Ddx4 (VASA) ( $3e^{-33}$ )<br>H, DBY ( $2e^{-29}$ ), DDX4 ( $4e^{-33}$ )                                                         | M, Ddx4 KO male infertile<br>H, DBY is frequently deleted in infertile patients                                                                                               |
| Y48A6B.3                                                                                 |               | ribosomal protein                         |                   | Mild/low penetrance abnormal gonad structure                                   | Abnormal gonad structure, Emo                                                            | Complete F1 Sterility Gro     | hermaphrodite sterility, herm and male cytological defects          | M, NADP-dependent malic enzyme ( $1.6e^{-168}$ )<br>H, NADP-dependent malic enzyme ( $3.4e^{-168}$ )                                |                                                                                                                                                                               |
| B0261.6                                                                                  |               | Novel                                     |                   | none detected                                                                  | abnormal gonad structure                                                                 | High Ste                      | hermaphrodite sterility, hermaphrodite cytological defects          |                                                                                                                                     |                                                                                                                                                                               |
| C30F12.7                                                                                 |               | isocitrate dehydrogenase                  |                   | none detected                                                                  | abnormal gonad morphology with clumped nuclei                                            | High Ste                      | hermaphrodite sterility, hermaphrodite cytological defects          | M, Isocitrate dehydrogenase ( $1.6e^{-104}$ )<br>H, Isocitrate dehydrogenase ( $5.9e^{-105}$ )                                      |                                                                                                                                                                               |
| F23B12.7                                                                                 |               | CBF/Mak21 and CCAAT binding factor 1 like |                   | abnormal gonad structure, defective chromosome segregation                     | abnormal gonad structure, oogenesis arrest or Emo                                        | High Ste Gro                  | hermaphrodite and male cytological defects                          | M, C/EBP zeta ( $9.9e^{-114}$ )<br>H, C/EBP zeta ( $1e^{-115}$ )                                                                    |                                                                                                                                                                               |
| F27C8.5                                                                                  |               | BTB/POZ domain                            |                   | none detected                                                                  | embryos do not form hard eggshells, only a few divisions before arrest                   | High Ste                      | hermaphrodite sterility, hermaphrodite cytological defects          |                                                                                                                                     |                                                                                                                                                                               |
| K04C2.2                                                                                  |               | DNA polymerase V                          |                   | some animals with abnormal gonad morphology, small or stunted                  | abnormal gonad structure, Emo                                                            | High Ste                      | hermaphrodite and male cytological defects                          | M, myb binding protein ( $1.6e^{-12}$ )<br>H, myb binding protein ( $1.7e^{-08}$ )                                                  |                                                                                                                                                                               |
| T13A10.11                                                                                | <i>tag-32</i> | S-adenosyl-methionine synthetase          |                   | Mild/low penetrance abnormal gonad structure                                   | abnormal gonad structure                                                                 | High Ste                      | hermaphrodite sterility, hermaphrodite and male cytological defects | M, Mat1a ( $1.3e^{-130}$ )<br>H, ENSP00000303147 ( $3.9e^{-131}$ )                                                                  |                                                                                                                                                                               |
| Y54F10BM.2                                                                               |               | Translation initiation factor IF2         |                   | abnormal gonad structure                                                       | abnormal gonad structure                                                                 | High Ste Gro                  | hermaphrodite and male cytological defects                          | M, Translation initiation factor 5B ( $1e^{-105}$ )<br>H, Translation initiation factor 5B ( $2.4e^{-169}$ ), NASP ( $4.7e^{-09}$ ) | H, NASP is a histone H1 binding protein found in sperm cells                                                                                                                  |
| B0207.5                                                                                  |               | Novel                                     |                   | low penetrance chromosome segregation problems                                 | none detected                                                                            | Moderate Ste                  | hermaphrodite sterility, hermaphrodite and male cytological defects | M, KIAA0853 ( $4.4e^{-11}$ ), ATRX ( $5e^{-10}$ )<br>H, ATRX ( $4.1e^{-13}$ )                                                       |                                                                                                                                                                               |
| C33H5.12                                                                                 | <i>rsp-6</i>  | SR Splicing Regulation Protein            |                   | abnormal gonad structure, meiotic problems with large nuclei in later germline | abnormal gonad development, oogenesis arrest or Emo.                                     | Moderate Ste                  | hermaphrodite sterility, hermaphrodite and male cytological defects | M, Sfrs3 ( $9.9e^{-33}$ ), Rbm3 ( $1.7e^{-12}$ )<br>H, RBMY1 ( $2.9e^{-12}$ ), CSTF2T42 ( $8.7e^{-09}$ ),                           | M, Sfrs3 KO Embryonic lethal<br>H, Microdeletions including RBMY correlate with male infertility; CSTF2T associated with male infertility, homologs expressed in male meiosis |
| F14D2.7                                                                                  |               | Novel                                     |                   | abnormal gonad structure                                                       | abnormal gonad structure, uneven nuclei, clumping.                                       | Moderate Ste                  | hermaphrodite sterility, hermaphrodite and male cytological defects |                                                                                                                                     |                                                                                                                                                                               |
| F38A5.6                                                                                  |               | Novel                                     |                   | none detected                                                                  | abnormal gonad development                                                               | Moderate Ste                  | hermaphrodite sterility, hermaphrodite cytological defects          |                                                                                                                                     |                                                                                                                                                                               |
| F54C8.1                                                                                  |               | 3-hydroxyacyl-CoA dehydrogenase           |                   | none detected                                                                  | Some animals with abnormal gonad structure; absence of fertilized embryos in some adults | Moderate Ste                  | hermaphrodite sterility, hermaphrodite cytological defects          | M, Short chain 3-hydroxyacyl-CoA dehydrogenase ( $8e^{-76}$ )<br>H, Short chain 3-hydroxyacyl-CoA dehydrogenase ( $1.7e^{-75}$ )    |                                                                                                                                                                               |
| K03H1.1                                                                                  |               | Glutamine synthetase                      |                   | Slightly disorganized gonad                                                    | Disorganized gonad, some Emo                                                             | Moderate Ste                  | hermaphrodite sterility, hermaphrodite and male cytological defects | M, Glutamine synthetase ( $1.4e^{-114}$ )<br>H, Glutamine synthetase ( $1.4e^{-114}$ )                                              |                                                                                                                                                                               |
| T10E9.4                                                                                  |               | DX module                                 |                   | none noted                                                                     | none detected                                                                            | Moderate Ste                  | hermaphrodite sterility, hermaphrodite cytological defects          |                                                                                                                                     |                                                                                                                                                                               |

| Gene ID   | Gene Name    | Descriptor              | <i>C. elegans</i> |                                                         |                                                                       |                                                             |                                                                     | Mammalian                                                                                            |                                                                                                  |
|-----------|--------------|-------------------------|-------------------|---------------------------------------------------------|-----------------------------------------------------------------------|-------------------------------------------------------------|---------------------------------------------------------------------|------------------------------------------------------------------------------------------------------|--------------------------------------------------------------------------------------------------|
|           |              |                         | Localization      | RNAi Cytological Defects                                |                                                                       | Phenotype                                                   | Sum: New Evidence for Fertility Function                            | Known Homolog                                                                                        | Fertility Link                                                                                   |
|           |              |                         |                   | Male                                                    | Hermaphrodite                                                         |                                                             |                                                                     |                                                                                                      |                                                                                                  |
| Y52B11A.5 |              | C-type lectin           |                   | none detected                                           | abnormal gonad structure (shortened, bulging, twisted)                | Moderate Ste                                                | hermaphrodite sterility, hermaphrodite cytological defects          |                                                                                                      |                                                                                                  |
| Y71H10A.1 |              | phosphofructokinase     |                   | low level abnormal gonad                                | abnormal gonad structure (small gonad arms, uneven and clumpy nuclei) | Moderate Ste                                                | hermaphrodite sterility, hermaphrodite and male cytological defects | M, 6-phospho-fructokinase (3.1e <sup>-236</sup> )<br>H, 6-phospho-fructokinase (3e <sup>-234</sup> ) |                                                                                                  |
| C14F11.7  |              | Novel                   |                   | none detected                                           | Low level abnormal gonad structure (gonad misoriented)                | Low Ste                                                     | hermaphrodite sterility, hermaphrodite cytological defects          |                                                                                                      |                                                                                                  |
| C17G10.8  | <i>dhs-6</i> | alcohol dehydrogenase   |                   | none detected                                           | none detected                                                         | Low Ste                                                     | hermaphrodite sterility                                             | M, HSDL2 (3.5e <sup>-107</sup> )<br>H, HSDL2 protein (4.6e <sup>-79</sup> )                          |                                                                                                  |
| C18G1.5   | <i>hil-4</i> | Histone H1              |                   | low level abnormal gonad and meiotic progression        | low level abnormal gonad and meiotic progression                      | Low Ste                                                     | hermaphrodite and male cytological defects                          | M, Histone H1t (1.9e <sup>-13</sup> )<br>H, Histone H1t (1.6e <sup>-12</sup> )                       | M, Histone H1t KO male infertile in combo with other genes                                       |
| C49C3.11  |              | lectin                  |                   | none detected                                           | none detected                                                         | Low Ste                                                     |                                                                     |                                                                                                      |                                                                                                  |
| F25E5.3   |              | serine protease         |                   | none detected                                           | low penetrance abnormal gonad development (shortened)                 | Low Ste                                                     | hermaphrodite sterility, hermaphrodite cytological defects          |                                                                                                      |                                                                                                  |
| K08C9.2   |              | Novel                   |                   | abnormal gonad structure and low level meiotic problems | none detected                                                         | Low Ste                                                     | hermaphrodite sterility, male cytological defects                   |                                                                                                      |                                                                                                  |
| W02B12.3  | <i>rsp-1</i> | splicing factor like    |                   | none detected                                           | none detected                                                         | Male Ste in combo with other <i>rsp</i> genes <sup>31</sup> |                                                                     | M, Sfrs3 (3.7e <sup>-18</sup> ), Rbm3 (1.7e <sup>-12</sup> )<br>H, RBMY1 (4.1e <sup>-13</sup> )      | M, Sfrs3 KO Embryonic lethal<br>H, microdeletions including RBMY correlate with male infertility |
| Y38H8A.3  |              | serine/threonine kinase |                   | none detected                                           | none detected                                                         | Low Ste                                                     | hermaphrodite sterility                                             | M, Tau-tubulin kinase (1.5e <sup>-56</sup> )<br>H, TTBK2 protein (8.9e <sup>-58</sup> )              |                                                                                                  |
| Y45F3A.1  |              | Novel                   |                   | none detected                                           | none detected                                                         | Low Ste                                                     |                                                                     |                                                                                                      |                                                                                                  |

Degrees of sterility are defined in Supplemental Methods. Symbols (\*, †, §, #, ψ) denote highly identical genes whose products may be depleted simultaneously by RNAi. Mammalian fertility link references are listed in Supplemental Table 8. RNAi resistant = protein product detected by immunolocalization in animals subjected to RNAi of corresponding gene. Emo=Endomitotic Reduplication. M = Mouse homologs, H = Human homologs, KO = mouse knock-out.

Supplemental Table 8 **Abundant *C. elegans* spermatogenesis-enriched chromatin proteins homologous to mammalian fertility factors**

| <i>C. elegans</i> |               |                                | Mammalian                                                                                                                       |                                                                                                                                                                               | References                                                                                                                                                                                                                                                |
|-------------------|---------------|--------------------------------|---------------------------------------------------------------------------------------------------------------------------------|-------------------------------------------------------------------------------------------------------------------------------------------------------------------------------|-----------------------------------------------------------------------------------------------------------------------------------------------------------------------------------------------------------------------------------------------------------|
| Gene ID           | Gene Name     | Descriptor                     | Known Homolog                                                                                                                   | Fertility Link                                                                                                                                                                |                                                                                                                                                                                                                                                           |
| W09C3.6*          | <i>gsp-3</i>  | glc7/PP1 phosphatase           | M, Ppp1cc (1e <sup>-102</sup> )<br>H, PPP1C (1e <sup>-95</sup> )                                                                | M, Ppp1cc KO male infertile                                                                                                                                                   | M, Ppp1cc: Varmuza, S. et al. Dev. Biol. 205, 98-110 (1999).                                                                                                                                                                                              |
| T03F1.5*          | <i>gsp-4</i>  | glc7/PP1 phosphatase           | M, Ppp1cc (1e <sup>-102</sup> )<br>H, PPP1C (1e <sup>-95</sup> )                                                                | M, Ppp1cc KO male infertile                                                                                                                                                   | M, Ppp1cc: Varmuza, S. et al. Dev. Biol. 205, 98-110 (1999).                                                                                                                                                                                              |
| ZK1251.1          | <i>htas-1</i> | histone H2A variant            | M, H2AX (2e <sup>-21</sup> ),<br>macroH2A(3e <sup>-27</sup> )<br>H, H2AX (3e <sup>-21</sup> ),<br>macroH2A (3e <sup>-27</sup> ) | M, H2AX KO male infertile                                                                                                                                                     | M, H2AX; Celeste, A. et al. Science 296, 922-7 (2002).                                                                                                                                                                                                    |
| C04G2.8§          | <i>spch-1</i> | SNBP-like                      | M, Histone H1T2 (2.3e <sup>-14</sup> )<br>H, SON DNA-binding protein (1.3e <sup>-19</sup> )                                     | M, Histone H1T2 KO male infertile                                                                                                                                             | M, Histone H1T2: Martianov, I. et al. Proc. Natl. Acad. Sci. U S A 102, 2808-13 (2005). Tanaka, H. et al. Mol. Cell. Biol. 25, 7107-19 (2005).                                                                                                            |
| C10G11.9§         | <i>spch-2</i> | SNBP-like                      | M, Histone H1T2 (2.3e <sup>-14</sup> )<br>H, SON DNA-binding protein (1.3e <sup>-19</sup> )                                     | M, Histone H1T2 KO male infertile                                                                                                                                             | M, Histone H1T2: Martianov, I. et al. Proc. Natl. Acad. Sci. U S A 102, 2808-13 (2005). Tanaka, H. et al. Mol. Cell. Biol. 25, 7107-19 (2005).                                                                                                            |
| T27A3.4§          | <i>spch-3</i> | SNBP-like                      | M, Histone H1T2 (2.3e <sup>-14</sup> )<br>H, SON DNA-binding protein (6.5e <sup>-20</sup> )                                     | M, Histone H1T2 KO male infertile                                                                                                                                             | M, Histone H1T2: Martianov, I. et al. Proc. Natl. Acad. Sci. U S A 102, 2808-13 (2005). Tanaka, H. et al. Mol. Cell. Biol. 25, 7107-19 (2005).                                                                                                            |
| C55B7.1           | <i>glh-2</i>  | RNA helicase                   | M, Ddx4 (VASA) (1e <sup>-105</sup> )<br>H, DBY (1e <sup>-92</sup> ), DDX4 (1e <sup>-105</sup> )                                 | M, Ddx4 KO male infertile<br>H, DBY is frequently deleted in infertile patients                                                                                               | M, Ddx4: Tanaka, S.S. et al. Genes Dev. 14, 841-53 (2000). Foresta, C., Ferlin, A. & Moro, E.<br>H, DBY: Foresta, C., Ferlin, A. & Moro, E. Hum Mol Genet 9, 1161-9 (2000).                                                                               |
| F55F8.2           |               | RNA helicase                   | M, Ddx4 (VASA) (3e <sup>-33</sup> )<br>H, DBY (2e <sup>-29</sup> ), DDX4 (4e <sup>-33</sup> )                                   | M, Ddx4 KO male infertile<br>H, DBY is frequently deleted in infertile patients                                                                                               | M, Ddx4: Tanaka, S.S. et al. Genes Dev. 14, 841-53 (2000). Foresta, C., Ferlin, A. & Moro, E.<br>H, DBY: Foresta, C., Ferlin, A. & Moro, E. Hum Mol Genet 9, 1161-9 (2000).                                                                               |
| B0511.6           |               | RNA helicase                   | M, Ddx4 (VASA) (1e <sup>-105</sup> )<br>H, DBY (1e <sup>-92</sup> )                                                             | M, Ddx4 KO male infertile<br>H, DBY is frequently deleted in infertile patients                                                                                               | M, Ddx4: Tanaka, S.S. et al. Genes Dev. 14, 841-53 (2000). Foresta, C., Ferlin, A. & Moro, E.<br>H, DBY: Foresta, C., Ferlin, A. & Moro, E. Hum Mol Genet 9, 1161-9 (2000).                                                                               |
| F42G9.1           |               | protein phosphatase            | M, Ppm1 (2.5e <sup>-09</sup> )<br>H, PPM1G (1e <sup>-55</sup> )                                                                 | M, Ppm1 KO male infertile                                                                                                                                                     | M, Ppm1: Choi, J. et al. Mol. Cell Biol. 22, 1094-105 (2002).                                                                                                                                                                                             |
| F56A6.1#          |               | piwi/PAZ domain                | M, MILI (1.2e <sup>-11</sup> )<br>H, PIWIL2 (1.6e <sup>-11</sup> ),<br>PIWIL1 (1e <sup>-08</sup> )                              | M, MILI KO male infertile                                                                                                                                                     | M, MILI: Kuramochi-Miyagawa, S. et al. Development 131, 839-49 (2004).                                                                                                                                                                                    |
| C18E3.7#          | <i>ppw-1</i>  | piwi/PAZ domain                | M, MILI (7.4e <sup>-12</sup> )<br>H, PIWIL2 (7.4e <sup>-12</sup> ),<br>PIWIL1 (9e <sup>-08</sup> )                              | M, MILI KO male infertile                                                                                                                                                     | M, MILI: Kuramochi-Miyagawa, S. et al. Development 131, 839-49 (2004).                                                                                                                                                                                    |
| B0414.3           | <i>hil-5</i>  | histone H1                     | M, Histone H1t (8.8e <sup>-16</sup> )<br>H, Histone H1t (1.4e <sup>-13</sup> )                                                  | M, Histone H1t KO male infertile in combo with other genes                                                                                                                    | M, Histone H1t: Nayernia, K. et al. Mol. Reprod. Dev. 70, 406-16 (2005).                                                                                                                                                                                  |
| C18G1.5           | <i>hil-4</i>  | Histone H1                     | M, Histone H1t (1.9e <sup>-13</sup> )<br>H, Histone H1t (1.6e <sup>-12</sup> )                                                  | M, Histone H1t KO male infertile in combo with other genes                                                                                                                    | M, Histone H1t: Nayernia, K. et al. Mol. Reprod. Dev. 70, 406-16 (2005).                                                                                                                                                                                  |
| C33H5.12          | <i>rsp-6</i>  | SR Splicing Regulation Protein | M, Sfrs3 (9.9e-33), Rbm3 (1.7e <sup>-12</sup> )<br>H, RBMY1 (2.9e <sup>-12</sup> ),<br>CSTF2T42 (8.7e <sup>-09</sup> ),         | M, Sfrs3 KO Embryonic lethal<br>H, Microdeletions including RBMY correlate with male infertility; CSTF2T associated with male infertility, homologs expressed in male meiosis | M, Sfrs3: Jumaa, H., Wei, G. & Nielsen, P.J. Curr. Biol. 9, 899-902 (1999)<br>H, RBMY: Mahadevaiah, S.K. et al. Hum. Mol. Genet. 7, 715-27 (1998). CSTF2T: Dass, B., McDaniel, L., Schultz, R.A., Attaya, E. & MacDonald, C.C. Genomics 80, 509-14 (2002) |

| <i>C. elegans</i> |              |                                   | Mammalian                                                                                                                                             |                                                                                                           | References                                                                                                                                                                                                              |
|-------------------|--------------|-----------------------------------|-------------------------------------------------------------------------------------------------------------------------------------------------------|-----------------------------------------------------------------------------------------------------------|-------------------------------------------------------------------------------------------------------------------------------------------------------------------------------------------------------------------------|
| Gene ID           | Gene Name    | Descriptor                        | Known Homolog                                                                                                                                         | Fertility Link                                                                                            |                                                                                                                                                                                                                         |
| W02B12.3          | <i>rsp-1</i> | splicing factor like              | M, Sfrs3 (3.7e <sup>-19</sup> ), Rbm3 (1.7e <sup>-12</sup> )<br>H, RBMY1 (4.1e <sup>-13</sup> )                                                       | M, Sfrs3 KO Embryonic lethal<br>H, microdeletions including RBMY correlate with male infertility          | M, Sfrs3: Jumaa, H., Wei, G. & Nielsen, P.J. Curr. Biol. 9, 899-902 (1999)<br>H, RBMY: Mahadevaiah, S.K. et al. Hum. Mol. Genet. 7, 715-27 (1998).                                                                      |
| Y54F10BM.2        |              | Translation initiation factor IF2 | M, Translation initiation factor 5B (1e <sup>-105</sup> )<br>H, Translation initiation factor 5B (2.4e <sup>-169</sup> ), NASP (4.7e <sup>-09</sup> ) | H, NASP is a histone H1 binding protein found in sperm cells                                              | H, NASP: Lee, Y.H. & O'Rand, M.G. Anat. Rec. 236, 442-8 (1993).                                                                                                                                                         |
| M01E5.5           | <i>top-1</i> | Topoisomerase I                   | M, TOP-1 (3e <sup>-154</sup> )<br>H, TOP-1 (1e <sup>-156</sup> )                                                                                      | M, TOP-1 KO Embryonic lethal<br>H, Decrease of topo I activity in testes of infertile men with varicocele | M, TOP-1: Morham, S.G., Kluckman, K.D., Voulomanos, N. & Smithies, O. Mol Cell Biol 16, 6804-9 (1996).<br>H, TOP-1: Fujisawa, M., Yoshida, S., Matsumoto, O., Kojima, K. & Kamidono, S. Arch. Androl. 21, 45-50 (1988). |
| C39E9.6           |              | SCP-like extracellular protein    | M, CRISP2 (1e <sup>-08</sup> )<br>H, CRISP2 (1e <sup>-08</sup> )                                                                                      | H, CRISP2 is testes specific gene, candidate male infertility gene                                        | H, CRISP2: Olesen, C. et al. Mol. Hum. Reprod. 7, 11-20 (2001).                                                                                                                                                         |
| F36H12.8ψ         |              | serine/threonine kinase           | M, Vrk2 (8e <sup>-15</sup> ); Tau-Tubulin Kinase (2.5e <sup>-56</sup> )<br>H, TTBK2 (3e <sup>-57</sup> )                                              | M, Vrk2 KO correlates with germ cell deficiency                                                           | M, Vrk2: Lu, B. & Bishop, C.E. Biol. Reprod. 69, 161-8 (2003)                                                                                                                                                           |
| R13H9.5ψ          |              | serine/threonine kinase           | M, Vrk2 (8e <sup>-15</sup> ); Tau-Tubulin Kinase (2.5e <sup>-56</sup> )<br>H, TTBK2 (3e <sup>-57</sup> )                                              | M, Vrk2 KO correlates with germ cell deficiency                                                           | M, Vrk2: Lu, B. & Bishop, C.E. Biol. Reprod. 69, 161-8 (2003)                                                                                                                                                           |

Symbols (\*, †, §, #, ψ) denote highly homologous genes. Mammalian homologs with E values ≤ 10<sup>-09</sup> were found using *C. elegans* protein sequences in BLAST searches of the GenBank database and/or annotations in WormBase (www.wormbase.org Release 155) and Worm Protein Database (BIOBASE). C, *C. elegans*; M, Mouse; H, Human; KO, Mouse Knock-Out.

Supplemental Table 9 Abundant spermatogenesis-enriched chromatin factors with mammalian homologs not yet linked to fertility

| Predicted Gene | <i>C. elegans</i> locus | Descriptor                                                       | <i>C. elegans</i> RNAi phenotype | Mouse Homolog (E value)                                                                    | Mouse Knock out phenotype                               | Human Homolog (E value)                                                                                            | References                                                                                                                           |
|----------------|-------------------------|------------------------------------------------------------------|----------------------------------|--------------------------------------------------------------------------------------------|---------------------------------------------------------|--------------------------------------------------------------------------------------------------------------------|--------------------------------------------------------------------------------------------------------------------------------------|
| K01G5.5        |                         | RNA processing, centromere/microtubule binding protein, dyskerin | Stp Lva Gro                      | Dyskerin (2.1e <sup>-154</sup> )                                                           | Embryonic Lethal                                        | Dyskerin (5.2e <sup>-160</sup> )                                                                                   | M, Dyskerin: He, J. et al. Oncogene 21, 7740-4 (2002).                                                                               |
| ZC116.3        |                         | bone morphogenetic protein 1 like CUB domains; EGF like domain   | None detected                    | Intrinsic factor-B12 receptor precursor (1e <sup>-223</sup> ); Notch2 (4e <sup>-50</sup> ) | Embryonic Lethal                                        | Intrinsic factor-B12 receptor (1e <sup>-218</sup> ), CUB and sushi multiple domains protein (1.5e <sup>-53</sup> ) | M, Notch: Hamada, Y. et al. Development 126, 3415-24 (1999).                                                                         |
| ZK328.2        | <i>eft-1</i>            | elongation factor 2; U5 snRNP-specific protein                   | Ste Emb Sck                      | U5 small nuclear ribonucleoprotein component (0), Sfrs3 (4e <sup>-13</sup> )               | Sfrs3 (splicing factors) is embryonic lethal            | U5 small nuclear ribonucleoprotein component (0), Elongation factor 2 (3.2e <sup>-150</sup> )                      | M, Sfrs3: Jumaa, H., Wei, G. & Nielsen, P. J. Curr. Biol. 9, 899-902 (1999).                                                         |
| F44G3.2        |                         | arginine kinase                                                  | None detected                    | Creatine kinase (3.5e <sup>-61</sup> )                                                     | Tissue Specific Defects                                 | Creatine kinase (3.5e <sup>-61</sup> )                                                                             | M, Creatine kinase: Nahrendorf, M. et al. Cardiovasc. Res. 65, 419-27 (2005).                                                        |
| Y51A2D.8       |                         | Cysteine proteases (2 domains) CTSL2 expressed in testes         | None detected                    | Cathepsin (2e <sup>-30</sup> ), Ctsk (8e <sup>-28</sup> )                                  | Tissue Specific Defects (bone, other)                   | Cathepsin L precursor (2.7e <sup>-33</sup> )                                                                       | M, Ctsk: Brachvogel, B. et al. Mol. Cell Biol. 23, 2907-13 (2003).                                                                   |
| B0365.3        | <i>eat-6</i>            | eat-6 Na(+)/K(+) ATPase alpha subunit status                     | Emb                              | Na+/K+-transporting ATPase $\alpha$ -4 chain (0)                                           | Tissue Specific Defects (brain, neonate)                | Na+/K+-transporting ATPase $\alpha$ -4 chain (0)                                                                   | M, ATPase: Moseley, A. E. et al. J. Biol. Chem. 278, 5317-24 (2003)                                                                  |
| T08G11.1       |                         | nucleotide binding protein vps-13 like                           | None detected                    | CHAC (0), D330038K10Rik protein (3.6e <sup>-168</sup> )                                    | Tissue Specific Defects (erythrocytes)                  | Vacuolar protein sorting 13 (0)                                                                                    | M, CHAC, Tomemori, Y. et al. J. Neurochem. 92, 759-66 (2005)                                                                         |
| D1007.6        | <i>rps-10</i>           | 40S ribosomal protein S10                                        | Ste Emb Unc Lva                  | 40S ribosomal protein S10 (4.8e <sup>-33</sup> ), Plec1 (1e <sup>-25</sup> )               | Tissue Specific Defects (heart, muscle, skin)           | 40S ribosomal protein S10 (1.6e <sup>-32</sup> )                                                                   | M, Plec1: Andra, K. et al. Genes Dev. 11, 3143-56 (1997)                                                                             |
| T13A10.11      | <i>tag-32</i>           | S-adenosylmethionine synthetase                                  | High Ste                         | Mat1a (1.3e <sup>-130</sup> )                                                              | Tissue Specific Defects (liver)                         | ENSP00000303147 (3.9e <sup>-131</sup> )                                                                            | M, Mat1a: Lu, S. C. et al. Proc. Natl. Acad. Sci. U S A 98, 5560-5 (2001); Martinez-Chantar, M. L. et al. Faseb J 16, 1292-4 (2002). |
| ZC155.1        | <i>nex-1</i>            | Annexin family member                                            | None detected                    | Annexin (4.2e <sup>-61</sup> )                                                             | Tissue Specific Defects (varies for different Annexins) | Annexin (4.8e <sup>-62</sup> )                                                                                     | M, Annexin: Brachvogel, B. et al. Mol. Cell Biol. 23, 2907-13 (2003); Roviezzo, F. et al. J. Physiol. Pharmacol. 53, 541-53 (2002).  |
| Y48B6A.12      |                         | Malic oxidoreductase                                             | None detected                    | NADP-dependent malic enzyme (1.6e <sup>-168</sup> )                                        |                                                         | NADP-dependent malic enzyme, mitochondrial precursor (3.4e <sup>-168</sup> )                                       |                                                                                                                                      |
| K03H1.1        | <i>gln-2</i>            | Glutamine synthetase, catalytic domain                           | None detected                    | Glutamine synthetase (1.4e <sup>-114</sup> )                                               |                                                         | Glutamine synthetase (4.8e <sup>-114</sup> )                                                                       |                                                                                                                                      |
| T25C8.3        | <i>qrs-4</i>            | glutamine synthetase family                                      | None detected                    | GLUL (1e <sup>-89</sup> )                                                                  |                                                         | Glutamine synthetase (1e <sup>-89</sup> )                                                                          |                                                                                                                                      |
| F49C12.15      |                         | Novel                                                            | None detected                    | Msx2-interacting protein (6e <sup>-12</sup> ), Splicing factor (5.9e <sup>-11</sup> )      |                                                         | Hypothetical protein FLJ35170 (4.5e <sup>-11</sup> ), Splicing factor (7.9e <sup>-11</sup> )                       |                                                                                                                                      |
| B0207.5        |                         | Novel                                                            | None detected                    | KIAA0853 (4.4e <sup>-11</sup> ), ATRX (5e <sup>-10</sup> )                                 |                                                         | Transcriptional regulator ATRX (4.1e <sup>-13</sup> )                                                              |                                                                                                                                      |
| F23B12.7       |                         | CCAAT binding factor 1 protein like, txn factor                  | Stp Gro lva                      | CCAAT enhancer binding protein zeta (9.91e <sup>-114</sup> )                               |                                                         | CCAAT enhancer binding protein zeta (1e <sup>-115</sup> )                                                          |                                                                                                                                      |
| ZK945.3        |                         | Puf family RNA-binding protein                                   | Egl Lva                          | Pumilio-family RNA binding domains (4.7e <sup>-71</sup> )                                  |                                                         | OTTHUMP00000020987 (1.6e <sup>-72</sup> )                                                                          |                                                                                                                                      |
| F07A11.2       |                         | glucosamine-fructose-6-phosphate                                 | Emb Ste                          | glucosamine-fructose-6-phosphate (1.7e <sup>-225</sup> )                                   |                                                         | glucosamine-fructose-6-phosphate (4.6e <sup>-225</sup> )                                                           |                                                                                                                                      |

| Predicted Gene | <i>C. elegans</i> locus | Descriptor                                                        | <i>C. elegans</i> RNAi phenotype | Mouse Homolog (E value)                                                                           | Mouse Knock out phenotype | Human Homolog (E value)                                                     | References |
|----------------|-------------------------|-------------------------------------------------------------------|----------------------------------|---------------------------------------------------------------------------------------------------|---------------------------|-----------------------------------------------------------------------------|------------|
| T28F2.4        |                         | Mina like (myc regulator)                                         | None detected                    | brain cDNA (5.8E <sup>-70</sup> ); Myc induced nuclear antigen (5.6e <sup>-40</sup> )             |                           | Myc induced nuclear antigen (5.6e <sup>-40</sup> )                          |            |
| F36A4.7        | <i>ama-1</i>            | RNA polymerase II                                                 | Ste Emb Gro Sck                  | RNA pol II (0)                                                                                    |                           | RNA pol II (0)                                                              |            |
| C16A3.3        |                         | rRNA processing protein                                           | Lva Egl Emb Gon Gro Lva Lvl      | MKIAA0185 protein (6.1e <sup>-85</sup> ), Programmed cell death protein 11 (1.5e <sup>-83</sup> ) |                           | RRP5 protein homolog (1.8e <sup>-91</sup> )                                 |            |
| JC8.3          | <i>rpl-12</i>           | ribosomal protein                                                 | Ste Gro Sck Emb                  | 60S ribosomal protein L12 (9.5e <sup>-67</sup> )                                                  |                           | 60S ribosomal protein L12 (3.2e <sup>-66</sup> )                            |            |
| T07A9.9        | <i>phi-58</i>           | GTP-binding protein CRFG/NOG1 (ODN superfamily)                   | Stp Emb Gro Lva Unc              | Nucleolar GTP-binding protein (4.6e <sup>-146</sup> )                                             |                           | 76 kDa protein (1.2e <sup>-157</sup> )                                      |            |
| W07E6.1        |                         | tRNA and rRNA cytosine-C5-methylase (nucleolar protein NOL1/NOP2) | Stp Ste Sle Emb Gro Lva Lon      | Nucleolar protein 1 (2.6e <sup>-134</sup> )                                                       |                           | Proliferating-cell nucleolar antigen p120 (2.7e <sup>-135</sup> )           |            |
| E03H12.5       |                         | Novel                                                             | None detected                    | Nucleolin (6e <sup>-21</sup> )                                                                    |                           | Nucleolin (3.7e <sup>-24</sup> )                                            |            |
| Y38H8A.3       |                         | casein kinase                                                     | None detected                    | Tau-tubulin kinase (1.5e <sup>-56</sup> )                                                         |                           | TTBK2 protein (8.9e <sup>-58</sup> )                                        |            |
| F38A5.3        | <i>lec-11</i>           | lectin                                                            | None detected                    | Galectin-9 (2.1e <sup>-07</sup> )                                                                 |                           | 40 kDa protein (3.7e <sup>-10</sup> )                                       |            |
| C17G10.8       | <i>dhs-6</i>            | alcohol dehydrogenase                                             | None detected                    | Hydroxysteroid dehydrogenase like 2 (3.5e <sup>-107</sup> )                                       |                           | HSDL2 protein (4.6e <sup>-79</sup> )                                        |            |
| F54C8.1        |                         | 3-hydroxyacyl-CoA dehydrogenase                                   | None detected                    | Short chain 3-hydroxyacyl-CoA dehydrogenase (8e <sup>-76</sup> )                                  |                           | Short chain 3-hydroxyacyl-CoA dehydrogenase (1.7e <sup>-75</sup> )          |            |
| Y71H10A.1      |                         | Phosphofructokinase                                               | Emb                              | 6-phosphofructokinase (3.1e <sup>-236</sup> )                                                     |                           | 6-phosphofructokinase (3e <sup>-234</sup> )                                 |            |
| F36D3.4        |                         | msp domain                                                        | None detected                    | Splicing factor, arginine/serine-rich 4 (6.6e <sup>-08</sup> )                                    |                           | Hypothetical protein FLJ46115 (4.3e <sup>-10</sup> )                        |            |
| K04C2.2        |                         | Predicted MYB-binding protein                                     | Stp Gro Lvl Sck Pvl Pch          | myb binding protein (1.6e <sup>-12</sup> )                                                        |                           | myb binding protein (1.7e <sup>-08</sup> )                                  |            |
| C32E8.2        | <i>rpl-13</i>           | ribosomal protein                                                 | Emb Lva Ste Sck                  | Ribosomal protein L13 (2.5e <sup>-59</sup> )                                                      |                           | Ribosomal protein L13 (3.2E <sup>-59</sup> )                                |            |
| C18A3.3        |                         | rRNA processing EBP2                                              | Emb Lva                          | rRNA processing protein EBP2 (2.8e <sup>-36</sup> )                                               |                           | rRNA processing protein EBP2 (7.2e <sup>-45</sup> )                         |            |
| C43E11.9       |                         | RNA binding (interacts with MEX-1)                                | Gro Lva                          | 60S ribosome subunit biogenesis protein NIP7 homolog (2.2e <sup>-61</sup> )                       |                           | 60S ribosome subunit biogenesis protein NIP7 homolog (5.1e <sup>-62</sup> ) |            |
| E04A4.8        | <i>rpl-20</i>           | ribosomal protein                                                 | Ste Sck Emb Gro                  | 60S ribosomal protein L18a (4.4e <sup>-58</sup> )                                                 |                           | 60S ribosomal protein L18a (2.7e <sup>-58</sup> )                           |            |
| F25B4.5        |                         | RNA-processing protein, HAT helix                                 | None detected                    | PRP39 pre-mRNA processing factor homolog (1.8e <sup>-59</sup> )                                   |                           | Hypothetical protein (1.8e <sup>-59</sup> )                                 |            |
| K12H4.3        |                         | Brix domain                                                       | Stp Lva Emb Gro                  | Ribosome biogenesis protein Brix (1.4e <sup>-63</sup> )                                           |                           | Ribosome biogenesis protein Brix (1.2e <sup>-71</sup> )                     |            |
| R13A5.12       | <i>lpc-7</i>            | Pescadillo, N-terminal, BRCA C terminal                           | Stp Lva Emb Gro Lvl              | Pescadillo homolog 1 (3.1e <sup>-118</sup> )                                                      |                           | Pescadillo homolog 1 (3.7e <sup>-93</sup> )                                 |            |



| Predicted Gene | <i>C. elegans</i> locus | Descriptor                                  | <i>C. elegans</i> RNAi phenotype | Mouse Homolog (E value)                                                         | Mouse Knock out phenotype | Human Homolog (E value)                                                                               | References |
|----------------|-------------------------|---------------------------------------------|----------------------------------|---------------------------------------------------------------------------------|---------------------------|-------------------------------------------------------------------------------------------------------|------------|
| Y48A6B.3       |                         | Ribosomal protein                           | Gro                              | small nucleolar protein (3.6e <sup>-32</sup> )                                  |                           | Hypothetical protein FLJ20479 (2.8e <sup>-32</sup> )                                                  |            |
| Y48B6A.1       |                         | Ribosomal protein L7Ae                      | Sck Gro Pck Lva                  | Ribosome biogenesis protein BOP1 (3.1e <sup>-162</sup> )                        |                           | Ribosome biogenesis protein BOP1 (6.3e <sup>-162</sup> )                                              |            |
| Y54E10A.10     |                         | Brix domain                                 | Lva Ste                          | Brix domain containing protein 1 (1.3e <sup>-59</sup> )                         |                           | Brix domain containing protein 1 (3.2e <sup>-58</sup> )                                               |            |
| Y75B8A.7       |                         | Mpp10 protein homolog                       | Gro Lva lvi                      | MPHOSPH10 protein (3e <sup>-58</sup> )                                          |                           | U3 small nucleolar ribonucleoprotein protein MPP10 (3.8e <sup>-67</sup> )                             |            |
| ZK430.1        |                         | HEAT repeat                                 | Gro Pch Emb Lvl Prz              | cDNA similar to PROTEIN BAP28s (5.7e <sup>-36</sup> )                           |                           | Protein BAP28 (7.3e <sup>-91</sup> )                                                                  |            |
| ZK354.2        |                         | serine/threonine kinase                     | None detected                    | Tau-tubulin kinase (1.5e <sup>-28</sup> ), Vrk1 (3e <sup>-10</sup> )            |                           | TTBK2 protein (9e <sup>-27</sup> )                                                                    |            |
| C39H7.1        |                         | serine/threonine kinase                     | None detected                    | Tau-tubulin kinase (1.7e <sup>-57</sup> ), Casein kinase I (7e <sup>-27</sup> ) |                           | TTBK2 protein (3e <sup>-57</sup> ), Casein kinase I (7e <sup>-27</sup> )                              |            |
| C30F12.7       |                         | isocitrate dehydrogenase                    | None detected                    | Isocitrate dehydrogenase (1.6e <sup>-104</sup> )                                |                           | Isocitrate dehydrogenase (5.9e <sup>-105</sup> )                                                      |            |
| F26E4.9        | <i>cco-1</i>            | cytochrome C oxidase                        | Clr Emb Gro Age Ste Lpd Lva      | Cytochrome c oxidase (3.1e <sup>-13</sup> )                                     |                           | Cytochrome c oxidase (1.1e <sup>-06</sup> )                                                           |            |
| R02D3.1        |                         | Saccharopine dehydrogenase                  | Gro                              | Alpha-aminoadipic semialdehyde synthase (1e <sup>-236</sup> )                   |                           | Alpha-aminoadipic semialdehyde synthase (1.8e <sup>-239</sup> )                                       |            |
| T22H6.2        |                         | Glutamate 5-kinase                          | None detected                    | Pyrroline-5-carboxylate synthetase (1.2e <sup>-209</sup> )                      |                           | Pyrroline-5-carboxylate synthetase (1.6e <sup>-209</sup> )                                            |            |
| B0286.3        |                         | SAICAR synthetase                           | None detected                    | Phosphoribosylaminoimidazole carboxylase (1.9e <sup>-109</sup> )                |                           | Phosphoribosylaminoimidazole carboxylase (1.1e <sup>-115</sup> )                                      |            |
| C52E4.7        |                         | Phosphoglycerate/bisphosphoglycerate mutase | None detected                    | ES cells cDNA (1.3e <sup>-10</sup> )                                            |                           | UBASH3A (3.8e <sup>-10</sup> ), Cbl-interacting protein Sts-1 (5e <sup>-10</sup> )                    |            |
| F07A5.2        |                         | Novel                                       | None detected                    | MKIAA0324 protein (5.9e <sup>-10</sup> )                                        |                           | RNA binding protein (1e <sup>-9</sup> )                                                               |            |
| F46H5.7        |                         | Novel                                       | None detected                    | ENSP0000034440(6e <sup>-10</sup> )                                              |                           | RNA binding protein (6.7e <sup>-9</sup> )                                                             |            |
| T23B3.5        |                         | Novel                                       | None detected                    | Nucleolin (3.2e <sup>-20</sup> )                                                |                           | Cylicin-2 (8.9e <sup>-23</sup> ), nucleolin (1.9e <sup>-22</sup> )                                    |            |
| Y38E10A.17     |                         | Novel                                       | None detected                    | Keratin (1.8e <sup>-21</sup> )                                                  |                           | T rich interactive domain 1B (SWI1-like) isoform 1 (2e <sup>-15</sup> ), Keratin (2e <sup>-15</sup> ) |            |
| Y46E12BL.2     |                         | HEAT repeat, Carbohydrate kinase, PfkB      | None detected                    | KIAA0690 (7.1e <sup>-86</sup> )                                                 |                           | Expressed sequence AA408556 (2.7e <sup>-115</sup> )                                                   |            |

Mammalian homologs with E values  $\leq 10^{-09}$  were found using *C. elegans* protein sequences in BLAST searches of the GenBank database and/or annotations in WormBase ([www.wormbase.org](http://www.wormbase.org) Release 155) and Worm Protein Database (BIOBASE). M, Mouse.
